# Supplementary material for: Phenotypic and genomic comparison of Photorhabdus luminescens subsp. laumondii TT01 and a widely used rifampicin-resistant Photorhabdus luminescens laboratory strain
Source: PubMed Central journal article supplement (PMC6267812; doi:10.1186/s12864-018-5121-z), 2018-11-29
Supplement: 12864_2018_5121_MOESM1_ESM.pdf [file 12864_2018_5121_MOESM1_ESM.pdf]

**Phenotypic and genomic comparison of *Photorhabdus luminescens* subsp. *laumondii* TT01 and a widely used rifampicin-resistant *Photorhabdus luminescens* laboratory strain**

Additional file 1

Maria-Antonia Zamora-Lagos<sup>1\*</sup>, Simone Eckstein<sup>2\*</sup>, Angela Langer<sup>2</sup>, Athanasios Gazanis<sup>2</sup>, Friedhelm Pfeiffer<sup>1</sup>, Bianca Habermann<sup>1,3#</sup> and Ralf Heermann<sup>2#</sup>

<sup>1</sup>Computational Biology Group, Max-Planck-Institute of Biochemistry, Am Klopferspitz 18, 82152 Martinsried, Germany

<sup>2</sup>Ludwig-Maximilians-Universität München, Biozentrum, Bereich Mikrobiologie, Martinsried, Germany

<sup>3</sup> Aix Marseille Université, CNRS UMR 7288, Computational Biology Group, Developmental Biology Institute of Marseille (IBDM) UMR 7288, CNRS, Marseille 13009, France

\* equal contribution; # co-corresponding authors

**Corresponding authors addresses:**

Dr. Bianca Habermann

Aix Marseille Université, CNRS UMR 7288, Computational Biology Group, Developmental Biology Institute of Marseille (IBDM), Marseille 13009, France

Phone: +33-4-91269236

e-mail: [bianca.HABERMANN@univ-amu.fr](mailto:bianca.HABERMANN@univ-amu.fr)

PD Dr. Ralf Heermann

Biozentrum, Bereich Mikrobiologie, Ludwig-Maximilians-Universität München, Großhaderner Str. 2-4, 82152 Martinsried, Germany

Phone: +49-89-2180-74506

e-mail: [heermann@lmu.de](mailto:heermann@lmu.de)

## **Additional file 1**

### **Phage-related repeat PhRepA in *P. luminescens***

One prophage covers a repeat, which is a patchwork of highly conserved but also of highly diverse sequences among the analysed strains. We have named these sequences the phage-related repeat A (PhRepA) region, since some of them are in regions assigned to be prophages (Supplementary Table S7). The two large indels between the two versions of TT01 represent extra copies of this repeat, one in each genome (Figure 3a). In general, there are 10 copies present in each of the TT01 genomes. In strain DJC, there are 8 copies of which 4 correspond to those of TT01m/TT01 while the other 4 are specific for strain DJC. The copies of PhRepA in the analysed *P. luminescens* genomes TT01, TT01m and DJC are schematically drawn in Figure 3a and listed in Supplementary Table S7. As it can be seen, the PhRepA repeat has a tendency to form tandem duplications. Only two elements are singlets (copies A and C in both, TT01 and DJC). The other copies occur as tandem duplicates with 2 to 6 copies within each cluster (copies B, D, and E). In those clusters, the terminal copy is complete while the other copies are truncated. Many strain differences are due to heterogeneity in these clusters of tandem duplications. Cluster B has three tandem copies in the two versions of TT01. Cluster D has three tandem copies in the new version of TT01m while the central copy is lacking from the published TT01 genome. *P. luminescens* strain DJC contains only a remnant of clusters B and D. Cluster E contains 4 tandem copies in the published TT01 genome while the second copy is not present in the new TT01m genome. There are six tandem copies in strain DJC but only the first two correspond to those of strain TT01 (Figure 3a).

Theoretically, the observed additional copies of PhRepA could represent genome assembly errors rather than biological differences. However, we consider misassembly of the TT01m genome as unlikely. Though PhRepA elements have extremely high similarity over several kb, the PacBio long read technology was shown to efficiently cope with duplications of that size [1].

PhRepA consists of two subregions that we refer to as the "core region", which is complete in all copies and encodes 6 genes, and the "adhesion region", which is rather diverse between different copies of PhRepA and is affected by truncation. The overview of the "core" and "adhesion" regions present in the TT01/TT01m genomes is

displayed in Figure 3b, copies and organization of these regions in the DJC genome is shown in Figure 3c and details are listed in Supplementary Tables S7 and S8.

The core region codes for a central gene pair, one gene containing a DNA primase (IPR13264 and IPR034151) and the other an integrase/recombinase (IPR011010) domain. This gene pair is highly conserved among all copies of PhRepA, including a 14 bp overlap between the two genes. Such a long overlap is not uncommon for genes with a -2 bp shift. Adjacent to the integrase is a short gene coding for a DNA-binding protein with a Cro/C1-type HTH domain (IPR001387), which is also found in phage lambda repressor. Genes encoding proteins with such a domain are not well conserved among PhRepA copies but belong to 5 distinct subtypes (*plu0545*, *plu1127*, *plu3581*, *plu3715* and PTE\_00007). Located next to the gene encoding the DNA-binding protein is a gene coding for a protein with a SymE-like toxin domain (IPR014944), which also occurs in several distinct subtypes. On the other side of the primase gene are the two short, conserved proteins *plu1142-like* and *plu0542*, which both lack assigned domains. The *plu1142* homologs are located in a 550 bp region, in which various ORFs have been assigned in the published TT01 genome. These ORFs are, however, self-contradictory. We selected *plu1142* as the most likely protein-coding gene in this region, although the *plu1142* homolog adjacent to *plu0542* is a missing gene call and several other copies in both strains are disrupted by an in-frame stop codon. The other annotated ORFs would have even more pronounced annotation problems if assigned to all PhRepA copies. Therefore, we consider them to be spurious.

The adhesion region of complete PhRepA elements, which can either be singlets or terminal copies of clusters, codes for a long protein (2135-4582 amino acids) with adhesion-related domains. These include several copies of pectin lyase fold domains (IPR012334) and of hemagglutinin repeats (IPR025157). Between this gene and the core region is a rather variable set of 1 to 7 genes. Adjacent tandem-duplicated copies of the PhRepA repeat have tendency to share the same gene set and may contain an adhesion protein remnant as a truncated gene. The PhRepA remnants B3 and D3 in strain DJC lack the whole adjacent sequence element except for a partial copy of the adhesion protein gene. In cluster B3, the gene is truncated by an ISPlu9 transposon. In cluster D3, a gene fusion couples the N-terminal 2135 residues of the adhesion protein in-frame to the C-terminal 883 residues of the protein preceding the PhRepA cluster. The N-terminal part of the gene in cluster D3 is highly similar to the genes of copy A and of the DJC-specific copy E8. All genes encoded on the different copies are

schematically drawn in Figure 3b (TT01 and TT01m) and Figure 3c (DJC) and are listed in Supplementary Table S7. It should be noted that four of the five clusters (A,B,D,E) include a gene encoding a secretion pathway transporter (also referred to as haemolysin activator), whereby the corresponding gene is located directly adjacent to the gene encoding the adhesion protein. The secretion transporter pathway gene is not covered by our definition of PhRepA.

## **Text S2: Mobile genetic elements in the *P. luminescens***

### **TT01/TT01m and DJC genomes**

We performed a detailed transposon analysis of the *P. luminescens* DJC and both TT01 genomes. According to ISFinder, there are 22 distinct transposons present in *P. luminescens* [2], some of which have been submitted in the course of this study. Some of these have a high number of copies (up to ~20 complete copies). In addition, there are many disrupted transposons. Only few of those have intact termini, but all of those have a disrupted transposase gene, making them unsuitable for ISFinder. We also identified a few types of MITEs.

*Transposons identified in the three P. luminescens genomes.* Many insertions in the indels and approximate inserts represent mobile genetic elements. They commonly include a target site duplication (TSD). The relative frequency of individual transposon classes is shown in Supplementary Figure S2. Initially, we found that ISPlu1 and ISPlu4 seemed to lack a TSD. However, we identified extra bases at the insertion points and the extended elements are bounded by a TSD. Therefore, these elements are a few bases longer than annotated by ISFinder. The extended bases are not palindromic and thus were initially not recognized as part of the inverted terminal repeats.

The transposons with the highest mobility are related to IS630. These belong to the IS630/Tc1/mariner superfamily which is found in both, prokaryotes and eukaryotes [3-5]. Although this class of transposons has been preferentially analysed in plants, such elements have also been identified in nematodes. Upon *in vitro* transposition of a bacterial element it could be shown that a sequence-specific TA dinucleotide is used for integration and that the element generates a 2 bp target site duplication (another TA dinucleotide) [6]. Defining element boundaries exclusively by sequence conservation consequently leads to some ambiguity, because the targeting site/TSD

will be included as part of the element. We categorized IS630-type elements from *P. luminescens* as CCC-type (ISPlu3, ISPlu8, ISPlu19) and as AATAA-type (ISPlu10, ISPlu16), according to characteristic sequences at or very close to the beginning of the element (Supplementary Figure S2).

*MITEs identified in the three P. luminescens genomes.* MITEs are mobile genetic elements, which are too short to carry a transposase gene. However, they have inverted terminal repeats related to other transposons and thus are mobilized *in trans* by the corresponding transposase [7]. During our analysis, we identified 6 new MITE types and submitted these to ISFinder.

The most frequent repeat with 552 complete copies in the TT01 genome and a typical length of 123 bp is MITEPlu5. Of the 552 complete copies, 467 have a length of 123 bp and were used to compute a sequence logo (Figure 4a), and subsequently a consensus sequence. Given the obvious high sequence conservation, it is remarkable that only a few of these elements are truly identical to each other and that none of the copies matches exactly to the consensus sequence. If fragments, targeted elements, and those with internal deletions are summarized, they result in a total of 660 copies (strain TT01; 649 in DJC). 47 of these elements represent indels between the TT01m and the DJC genome. A related element has been described as an ERIC sequence [8]. This element has recently been added to the ISFinder database as MITEEc1, based on our submission. MITEPlu5 shows an extremely strong secondary structure when analysed by RNAfold [9] (Figure 4b) as also previously reported for MITEYpe1 [10]. We analysed this element in more detail (Figure 5). We detected sequence similarities between MITEPlu5 and a subset of the IS630-type transposons with marked conservation of a CCC trinucleotide close to the terminus. This makes it likely that MITEPlu5 is related to the CCC subtype of IS630-type transposons, which is represented by ISPlu3, ISPlu8 and ISPlu19. A similar situation exists for MITEPlu2, which is related to the AATAA subtype of IS630-type transposons represented by ISPlu10 and ISPlu16. Of all transposons/MITEs found inserted in one of the two genomes, 49% belong to the CCC subtype of IS630-type, making this the most active element for transposition.

We consider MITEPlu5 as non-coding. However, some of the copies lack stop codons in some frames. This has resulted in protein coding gene annotation by the PGAP pipeline. We have retained these ORFs but have assigned the protein name

"pseudocoding frame MITEPlu5" as a warning for annotation robots. We also encountered several cases in which MITEPlu5 is fused in-frame with upstream or downstream genes. We consider these genes disrupted and removed the protein sequence segment translated from MITEPlu5. In very few cases the MITEPlu5 is integrated into the original stop codon, as it targets TA dinucleotides. This led to a MITEPlu5-derived C-terminal extension. To avoid annotation problems caused by such extremely well conserved extensions, we truncated the ORFs at the junction between the genomic sequence and MITEPlu5.

Our observations suggest that MITEs and potentially other transposable elements can lead to mis-annotations by the PGAP pipeline. Short ORFs consisting largely of MITEPlu5 and only few bases from adjacent unique genome sequence (<100 bp) were mis-annotated to have specific protein names. The ORFs were annotated as "riboflavin synthase", "chorismate lyase", "addiction toxin module relE", "SprT family protein", "pirin family protein". We performed BLASTx comparisons against the UniProt and NCBI nr databases to validate that the genome-derived section does not support the mis-assigned protein name. In several cases, identical mis-annotations have been made for both genomes. To avoid mis-annotation in the future, we suggest that automated annotation robots should be optimized to deal with such situations.

## References

1. Pfeiffer F, Zamora-Lagos M-A, Blettinger M, Yeroslaviz A, Dahl A, Gruber S, et al. The complete and fully assembled genome sequence of *Aeromonas salmonicida* subsp. *pectinolytica* and its comparative analysis with other *Aeromonas* species: investigation of the mobilome in environmental and pathogenic strains. *BMC Genomics*. 2018;19:20.
2. Siguier P, Varani A, Perochon J, Chandler M. Exploring bacterial insertion sequences with ISfinder: objectives, uses, and future developments. *Methods Mol. Biol.* Totowa, NJ: Humana Press; 2012;859:91–103.
3. Tellier M, Bouuaert CC, Chalmers R. Mariner and the ITm superfamily of transposons. *Microbiol Spectr*. 2015;3:MDNA3–0033–2014.
4. Coy MR, Tu Z. Gambol and Tc1 are two distinct families of DD34E transposons: analysis of the *Anopheles gambiae* genome expands the diversity of the IS630-Tc1-mariner superfamily. *Insect Mol. Biol.* Blackwell Science Ltd; 2005;14:537–46.
5. Studer N, Frey J, Vanden Bergh P. Clustering subspecies of *Aeromonas salmonicida* using IS630 typing. *BMC Microbiol*. 2013;13:36.
6. Feng X, Colloms SD. In vitro transposition of ISY100, a bacterial insertion sequence belonging to the Tc1/mariner family. *Mol. Microbiol.* Blackwell Publishing Ltd; 2007;65:1432–43.

7. Filée J, Siguier P, Chandler M. Insertion sequence diversity in archaea. *Microbiol. Mol. Biol. Rev.* 2007;71:121–57.
8. Hulton CS, Higgins CF, Sharp PM. ERIC sequences: a novel family of repetitive elements in the genomes of *Escherichia coli*, *Salmonella typhimurium* and other enterobacteria. *Mol. Microbiol.* 1991;5:825–34.
9. Gruber AR, Lorenz R, Bernhart SH, Neuböck R, Hofacker IL. The Vienna RNA websuite. *Nucleic Acids Res.* 2008;36:W70–4.
10. De Gregorio E, Silvestro G, Petrillo M, Carlomagno MS, Di Nocera PP. Enterobacterial repetitive intergenic consensus sequence repeats in *Yersinia*: genomic organization and functional properties. *J. Bacteriol.* 2005;187:7945–54.

**Supplementary Table S1: Differences between the newly sequenced *P. luminescens* genome TT01m and the originally published genome TT01.** A total of 30 differences was detected (nr). For each genome, the differing position/region and the sequence-specific bases (or their length) is provided. Alternatively, the sequence of a tandem repeat with its copy number in parenthesis is given. A deletion is indicated by a hyphen. In this case, the adjacent bases are specified, separated by a slash (/). The type of difference is named as "point" (point mutation), "shift" (one-base indels, eventually as part of a polynucleotide run), "diff" (for adjacent mutations and/or indel of a few bases), "indel" (all of which are longer than 1 kb and are related to the long repeat PhRepA), "inversion", or "copy-nr" (copy number differences for tandem repeats). Note that the 1<sup>st</sup> difference is an inversion (1a) having an internal "shift" difference (1b).

| <i>P. luminescens</i> TT01m |                 | <i>P. luminescens</i> TT01 |             |               |           |                                                                                                                                                                                                                                           |
|-----------------------------|-----------------|----------------------------|-------------|---------------|-----------|-------------------------------------------------------------------------------------------------------------------------------------------------------------------------------------------------------------------------------------------|
| nr                          | pos             | seq/length                 | pos         | seq/length    | type      | comment                                                                                                                                                                                                                                   |
| 1a                          | 26555-29975     | 3421 bp (fwd)              | 29976-26555 | 3422 bp (rev) | inversion | bounded by a 86 bp inverted repeat; N-termini of outer ORFs within repeat; =-31--> -32-> <--33-- <--34-= (plu0031-plu0034); on prophage R01                                                                                               |
| 1b                          | 28275-28276     | GG                         | 28256-28254 | GGG           | shift     | this one-base indel is in the intergenic region between <i>plu0033</i> and <i>plu0034</i> ; on prophage R01                                                                                                                               |
| 2                           | 43959           | T                          | 43960       | C             | point     | point mutation in <i>plu0049</i> leading to amino acid replacement G177D                                                                                                                                                                  |
| 3                           | 282721          | A                          | 282722      | C             | point     | point mutation in <i>plu0267</i> leading to amino acid replacement N134K                                                                                                                                                                  |
| 4                           | 544022          | G                          | 544023      | A             | point     | point mutation in <i>plu0497</i> leading to amino acid replacement K118E                                                                                                                                                                  |
| u5                          | 1324641-1324642 | AA                         | 1324642     | A             | shift     | gene disrupted by frameshift in TT01; the N-term part of the corresponding protein is annotated as <i>plu1145</i> , the C-term part of the corresponding protein as <i>plu1144</i> ; an undisrupted near-identical gene is <i>plu3697</i> |
| 6                           | 1697992         | T                          | 1697992     | A             | point     | point mutation in <i>plu1414</i> leading to amino acid replacement S191C                                                                                                                                                                  |
| 7                           | 1714304         | G                          | 1714304     | A             | point     | intergenic                                                                                                                                                                                                                                |



|    |                 |                                        |                 |                                    |           |                                                                                                                                                                                    |
|----|-----------------|----------------------------------------|-----------------|------------------------------------|-----------|------------------------------------------------------------------------------------------------------------------------------------------------------------------------------------|
| 8  | 1714443-1714444 | TT                                     | 1714443         | T                                  | shift     | Disrupts the multiply affected gene <i>sdhC</i> between codons 36 and 37; in TT01, <i>sdhC</i> ( <i>plu1426</i> ) is annotated starting with the TTG for Leu-43                    |
| 9  | 1714482         | G                                      | 1714481         | A                                  | point     | point mutation in the multiply affected gene <i>sdhC</i> ( <i>plu1426</i> ) leading to amino acid replacement G45E                                                                 |
| 10 | 2582950         | T                                      | 2582949-2582950 | TT                                 | shift     | gene disrupted by frameshift in TT01; the N-term part of the corresponding protein is annotated as <i>plu2195</i> , the C-term part of the corresponding protein as <i>plu2196</i> |
| 11 | 2871215         | G                                      | 2871215         | C                                  | point     | point mutation in <i>plu2443</i> leading to amino acid replacement W139S                                                                                                           |
| 12 | 3103155-3103156 | AA                                     | 3103155-3103157 | AAA                                | shift     | <i>plu2648</i> lacks the N-terminal region of the corresponding protein, start codon out of frame                                                                                  |
| 13 | 3272404-3272407 | CCCC                                   | 3272405-3272409 | CCCCC                              | shift     | <i>plu2762</i> contains an aberrant N-terminal region of the corresponding protein                                                                                                 |
| 14 | 3374998-3375301 | TTAGTTTA (38)                          | 3375000-3375311 | TTAGTTTA (39)                      | copy-nr   |                                                                                                                                                                                    |
| 15 | 3508347-3514141 | 5795 bp (fwd)                          | 3514151-3508357 | 5795 bp (rev)                      | inversion | bounded by a 35 bp inverted repeat; on prophage R14                                                                                                                                |
| 16 | 4207421-4207429 | TTTTACAGG (46)<br>TTAAAACATC<br>G (11) | 4207431-4207436 | TTTTACAGG (47)<br>TTAAAACATCG (10) | copy-nr   |                                                                                                                                                                                    |
| 17 | 4236070-4244938 | 8869 bp                                | 4236076/4236077 | -                                  | indel     | an insertion in TT01m (PhRepA_D) of which 1492 bp represent a copy of ISPlu9                                                                                                       |
| 18 | 4358242/4358243 | -                                      | 4349381-4359525 | 10145 bp                           | indel     | a deletion in TT01m (PhRepA_E) of which 1492 bp represent a copy of ISPlu9; prophage R17                                                                                           |
| 19 | 4778231-4778342 | TAGTTATTG<br>AAGTAAA (7)               | 4779514-4779641 | TAGTTATTG<br>AAGTAAA (8)           | copy-nr   | <i>plu4091</i> terminates within the first copy of the repeat                                                                                                                      |
| 20 | 4861732         | C                                      | 4863031         | A                                  | point     | within a copy of PhoLumMITEPlu5                                                                                                                                                    |
| 21 | 4863021         | C                                      | 4864320         | A                                  | point     | ISPlu20 (deviates from canonical ISPlu20 sequence only in TT01)                                                                                                                    |
| 22 | 5259405         | A                                      | 5260704         | T                                  | point     | intergenic                                                                                                                                                                         |
| 23 | 5259440         | C                                      | 5260739-5260740 | TA                                 | diff      | affects the C-terminal region of the corresponding protein of the multiply affected gene <i>plu4505</i> in TT01                                                                    |
| 24 | 5259451-5259452 | AA                                     | 5260751-5260753 | GAC                                | diff      | leads to an aberrant C-terminal region in the corresponding protein of the multiply affected gene <i>plu4505</i> in TT01                                                           |

|    |                 |                                |                 |                                |         |                                                                                                      |
|----|-----------------|--------------------------------|-----------------|--------------------------------|---------|------------------------------------------------------------------------------------------------------|
| 25 | 5259487-5259489 | AGC                            | 5260788-5260790 | TTT                            | diff    | point mutation in <i>plu4504</i> leading to amino acid replacement K62L                              |
| 26 | 5261212         | C                              | 5262513         | T                              | point   | silent mutation in <i>plu4506</i>                                                                    |
| 27 | 5350422-5350424 | CCC                            | 5351723-5351726 | CCCC                           | shift   | <i>plu4585</i> contains an aberrant region encoding the C-terminal part of the corresponding protein |
| 28 | 5472344         | C                              | 5473646         | G                              | point   | in 16S rRNA                                                                                          |
| 29 | 5529801-5530328 | TAAGCAAA (20)<br>TAAGTAAA (46) | 5531103-5531638 | TAAGCAAA (20)<br>TAAGTAAA (47) | copy-nr |                                                                                                      |
| 30 | 5560378         | A                              | 5561688         | G                              | point   | silent mutation in <i>plu4782</i>                                                                    |

**Supplementary Table S2: Genome comparison between *P. luminescens* strain DJC and TT01 (as represented by the newly sequenced genome TT01m).** The genome is split into matching segments (matchSEG) and divergent segments (divSEGs). Each matchSEG is identified by its serial number (nr). DivSEGs carry the same number as the subsequent matchSEG. They are categorized into four distinct types: (indel, approximate insert (approxI), replace, copynr) (see below for an explanation). matchSEGs and the type of divSEG are indicated in the "type" column. Between each pair of matchSEGs is a divSEG with few exceptions (matchSEGs 3-5, 147-149, and 214-216). In these cases, the central matchSEG is inverted between the two strains without any separating divSEG (inversions are mentioned in the comment column). For each strain, the genome position (pos) and the length (length) is given. For inverted matchSEGs, reverse orientation is indicated by /R for the TT01m genome. For matchSEGs, the percent sequence difference is given (%diff). The majority of matchSEGs show less than 1% sequence difference. For the matchSEGs with more than 1% sequence difference, which tend to be relatively short, more details are provided in the comment column (allowed terms are DissimGlobal, DissimLocal, DissimButShort) (see below for an explanation). For each matchSEG, the difference details are provided as a set of four integers (see below for an explanation). All divSEGs have explanatory information in the comment column. Explanation details: (a) terms for matchSEGs with more than 1% sequence difference: DissimButShort indicates a short segment (below 2 kb). Longer matchSEGs may have a cluster of divergence (DissimLocal) or may have a generally increased mutation rate (DissimGlobal); (b) the four numbers for the difference details are the alignment bases, the number of point mutations, the number of gap open characters, and the number of gap extension characters; (c) types of divSEGs are: (c1) indel: there are extra bases in one strain while the genome is contiguous in the other, allowing an exact positioning of the insert; (c2) approximate insert: an insert which cannot be exactly positioned; restriction to approximate positioning is due to a few unaligned bases (maximally 10) at the insertion site; (c3) replace: there are additional sequences in both strains and these are too unrelated to be considered a matchSEG; (c4) copynr: there are short tandem repeats (7-12 bp) with a differing number of copies between the strains; (d) explanations of divergent segments: (d1) in case of copynr, the tandem repeat is given and the number of copies in the two genomes (TT01m and DJC). Otherwise, the region is briefly described by a short term; (d2) mobile genetic elements are flagged by MGE:ISPlu, MGE:MITEPlu, or MGE:IRS plus the serial number of the element. ISPlu refers to

elements found in the IS section of ISFinder, MITEPlu to those in the MITE section, while IRS (insertion related sequence) is used for other elements. The extension "+TSD", used only for type indel, indicates that the element is bounded by a target site duplication; (d3) for CRISPRs, counts are provided for strain-specific spacers (tagged extra), for matching spacers (tagged shared) and for multiple occurrences of an identical spacer (tagged duplicated). The partial deletion of cas1 is indicated (cas1\_truncated as opposed to cas1\_complete); (d4) for indel, approximate insert, and replace, the sequences are categorized by terms "specific" (strain-specific, may be completely unrelated or may have up to ca 85% sequence identity), "SeqRelated" (sequences have more than 85% sequence identity but below 98% seq\_id), "InternallyRepeated" (a genome-internal duplication so that a highly related sequence is found elsewhere), "HighSimElsewhere" (a near-identical sequence which is found at an unrelated genome position in the other strain, precluding its classification as matchSEG) or "FewAdjacent" (which indicates a short extra region of less than 100 bp outside a mobile genetic element). A small number of divSEGs are tagged by a more extended wording, including a reference to an atypical sequence of 121 bp which is found exclusively in a subset of the 23S rRNAs of strain TT01. For long insertions or long replacement sequences, overlaps with prophage regions (see Supplementary Table S5) are indicated. Whenever appropriate, a relation to the long repeat PhRepA is indicated in the explanations.

|    |          | <i>P. luminescens</i> TT01m |        | <i>P. luminescens</i> DJC |        |       |                    |                                                      |
|----|----------|-----------------------------|--------|---------------------------|--------|-------|--------------------|------------------------------------------------------|
| nr | type     | pos                         | length | pos                       | length | %diff | difference details | comments                                             |
| 1  | matchSEG | 1-7476/F                    | 7476   | 1-7476/F                  | 7476   | 0.12  | 7476/9/0/0         | -                                                    |
| 2  | replace  | 7477-8092/F                 | 616    | 7477-8220/F               | 744    | -     | -                  | TT01m:InternallyRepeated ; DJC:specific+MGE:MITEPlu5 |
| 2  | matchSEG | 8093-23764/F                | 15672  | 8221-23893/F              | 15673  | 0.11  | 15673/17/1/0       | -                                                    |
| 3  | indel    | 23765-23889/F               | 125    | -                         | -      | -     | -                  | MGE:MITEPlu5+TSD                                     |
| 3  | matchSEG | 23890-26554/F               | 2665   | 23894-26558/F             | 2665   | 0.30  | 2665/8/0/0         | -                                                    |

|    |          |                 |        |                 |        |      |                 |                                                                                   |
|----|----------|-----------------|--------|-----------------|--------|------|-----------------|-----------------------------------------------------------------------------------|
| 4  | matchSEG | 26555-29975/R   | 3421   | 26559-29986/F   | 3428   | 6.19 | 3423/210/2/5    | DissimLocal+inverted (in TT01m inverted, in both, TT01 and DJC not)(prophage R01) |
| 5  | matchSEG | 29976-102020/F  | 72045  | 29987-102031/F  | 72045  | 0.19 | 72045/138/0/0   | -                                                                                 |
| 6  | replace  | 102021-102553/F | 533    | 102032-112272/F | 10241  | -    | -               | TT01m:specific+MGE:MITEPlu5 ; DJC:specific+MGE:multi (prophage R01)               |
| 6  | matchSEG | 102554-158090/F | 55537  | 112273-167804/F | 55532  | 0.23 | 55534/123/4/5   | -                                                                                 |
| 7  | indel    | -               | -      | 167805-167929/F | 125    | -    | -               | MGE:MITEPlu5+TSD                                                                  |
| 7  | matchSEG | 158091-294110/F | 136020 | 167930-303989/F | 136060 | 0.12 | 136021/161/6/44 | -                                                                                 |
| 8  | indel    | -               | -      | 303990-304136/F | 147    | -    | -               | specific                                                                          |
| 8  | matchSEG | 294111-341841/F | 47731  | 304137-351854/F | 47718  | 0.28 | 47719/131/2/13  | -                                                                                 |
| 9  | indel    | 341842-343615/F | 1774   | -               | -      | -    | -               | MGE:ISPlu4+TSD                                                                    |
| 9  | matchSEG | 343616-347423/F | 3808   | 351855-355662/F | 3808   | 0.32 | 3808/12/0/0     | -                                                                                 |
| 10 | indel    | 347424-348522/F | 1099   | -               | -      | -    | -               | MGE:ISPlu19+TSD                                                                   |
| 10 | matchSEG | 348523-361100/F | 12578  | 355663-368237/F | 12575  | 0.44 | 12576/54/1/2    | -                                                                                 |
| 11 | indel    | 361101-386643/F | 25543  | -               | -      | -    | -               | InternallyRepeated+MGE:multi (prophage R02)                                       |
| 11 | matchSEG | 386644-415430/F | 28787  | 368238-397024/F | 28787  | 0.01 | 28787/3/0/0     | -                                                                                 |
| 12 | indel    | 415431-416581/F | 1151   | -               | -      | -    | -               | MGE:ISPlu10+TSD                                                                   |
| 12 | matchSEG | 416582-430275/F | 13694  | 397025-410718/F | 13694  | 0.15 | 13694/20/0/0    | -                                                                                 |
| 13 | indel    | 430276-431271/F | 996    | -               | -      | -    | -               | MGE:ISPlu6+TSD                                                                    |
| 13 | matchSEG | 431272-501718/F | 70447  | 410719-481167/F | 70449  | 0.13 | 70449/91/2/0    | -                                                                                 |

|    |          |                 |       |                 |       |       |               |                                                                            |
|----|----------|-----------------|-------|-----------------|-------|-------|---------------|----------------------------------------------------------------------------|
| 14 | indel    | 501719-502869/F | 1151  | -               | -     | -     | -             | MGE:ISPlu10+TSD                                                            |
| 14 | matchSEG | 502870-503343/F | 474   | 481168-481641/F | 474   | 0.00  | 474/0/0/0     | -                                                                          |
| 15 | copynr   | 503344-503523/F | 180   | 481642-481731/F | 90    | -     | -             | CTGTTAAAG(TT01m:20/ DJC:10)                                                |
| 15 | matchSEG | 503524-572180/F | 68657 | 481732-550388/F | 68657 | 0.02  | 68657/17/0/0  | -                                                                          |
| 16 | indel    | -               | -     | 550389-551487/F | 1099  | -     | -             | MGE:ISPlu19+TSD                                                            |
| 16 | matchSEG | 572181-590415/F | 18235 | 551488-569749/F | 18262 | 0.53  | 18224/93/4/53 | -                                                                          |
| 17 | replace  | 590416-598115/F | 7700  | 569750-571766/F | 2017  | -     | -             | TT01m: specific+InternallyRepeated+SeqRelated ;<br>DJC:specific+SeqRelated |
| 17 | matchSEG | 598116-598561/F | 446   | 571767-572207/F | 441   | 4.30  | 442/18/1/4    | DissimButShort                                                             |
| 18 | indel    | -               | -     | 572208-573707/F | 1500  | -     | -             | MGE:ISPlu9+TSD                                                             |
| 18 | matchSEG | 598562-610041/F | 11480 | 573708-585187/F | 11480 | 1.65  | 11480/189/0/0 | DissimLocal(PhRepA)                                                        |
| 19 | indel    | -               | -     | 585188-587534/F | 2347  | -     | -             | MGE:ISPlu20+TSD                                                            |
| 19 | matchSEG | 610042-633621/F | 23580 | 587535-611066/F | 23532 | 0.37  | 23533/86/1/47 | -                                                                          |
| 20 | approxl  | 633622-633625/F | 4     | 611067-611193/F | 127   | -     | -             | TT01m:FewUnaligned ; DJC:MGE:MITEPlu5                                      |
| 20 | matchSEG | 633626-641736/F | 8111  | 611194-619304/F | 8111  | 0.49  | 8111/40/0/0   | -                                                                          |
| 21 | replace  | 641737-641861/F | 125   | 619305-619332/F | 28    | -     | -             | TT01m:MGE:MITEPlu5 ; DJC:specific                                          |
| 21 | matchSEG | 641862-642044/F | 183   | 619333-619515/F | 183   | 11.96 | 184/20/2/0    | DissimButShort                                                             |
| 22 | indel    | -               | -     | 619516-619640/F | 125   | -     | -             | MGE:MITEPlu5+TSD                                                           |
| 22 | matchSEG | 642045-642379/F | 335   | 619641-619975/F | 335   | 4.18  | 335/14/0/0    | DissimButShort                                                             |

|    |          |                 |       |                 |       |      |                |                                                                                                                                     |
|----|----------|-----------------|-------|-----------------|-------|------|----------------|-------------------------------------------------------------------------------------------------------------------------------------|
| 23 | indel    | -               | -     | 619976-621127/F | 1152  | -    | -              | MGE:ISPlu16+TSD                                                                                                                     |
| 23 | matchSEG | 642380-643274/F | 895   | 621128-622022/F | 895   | 7.71 | 895/69/0/0     | DissimButShort                                                                                                                      |
| 24 | replace  | 643275-643893/F | 619   | 622023-622085/F | 63    | -    | -              | TT01m:InternallyRepeated+MGE:MITEPlu5 ; DJC:remnant of MGE:MITEPlu5                                                                 |
| 24 | matchSEG | 643894-727267/F | 83374 | 622086-705477/F | 83392 | 0.32 | 83375/262/2/18 | -                                                                                                                                   |
| 25 | indel    | -               | -     | 705478-718227/F | 12750 | -    | -              | InternallyRepeated                                                                                                                  |
| 25 | matchSEG | 727268-804557/F | 77290 | 718228-795513/F | 77286 | 0.03 | 77287/25/1/3   | -                                                                                                                                   |
| 26 | replace  | 804558-804678/F | 121   | 795514-795524/F | 11    | -    | -              | TT01m:an atypical 121 bp insert in copies C and E of 23S rRNA ; DJC:contains the typical 11 bp region found in nearly all 23S rRNAs |
| 26 | matchSEG | 804679-808546/F | 3868  | 795525-799392/F | 3868  | 0.21 | 3868/8/0/0     | -                                                                                                                                   |
| 27 | indel    | -               | -     | 799393-802317/F | 2925  | -    | -              | MGE:ISPlu10+TSD (ISPlu10 targeted by MGE:ISPlu4)                                                                                    |
| 27 | matchSEG | 808547-827866/F | 19320 | 802318-821637/F | 19320 | 0.04 | 19320/7/0/0    | -                                                                                                                                   |
| 28 | replace  | 827867-829937/F | 2071  | 821638-823445/F | 1808  | -    | -              | TT01m:specific+SeqRelated+MGE:ISPlu19+MGE:MITEPlu5 ; DJC:specific+SeqRelated+MGE:MITEPlu5                                           |
| 28 | matchSEG | 829938-847286/F | 17349 | 823446-840798/F | 17353 | 0.14 | 17351/23/2/2   | -                                                                                                                                   |
| 29 | indel    | 847287-848437/F | 1151  | -               | -     | -    | -              | MGE:ISPlu10+TSD                                                                                                                     |
| 29 | matchSEG | 848438-927729/F | 79292 | 840799-920078/F | 79280 | 0.10 | 79252/72/7/75  | -                                                                                                                                   |
| 30 | indel    | -               | -     | 920079-920203/F | 125   | -    | -              | MGE:MITEPlu5+TSD                                                                                                                    |
| 30 | matchSEG | 927730-984397/F | 56668 | 920204-976959/F | 56756 | 0.25 | 56672/137/5/85 | -                                                                                                                                   |

|    |          |                   |       |                   |       |      |               |                                         |
|----|----------|-------------------|-------|-------------------|-------|------|---------------|-----------------------------------------|
| 31 | indel    | 984398-985483/F   | 1086  | -                 | -     | -    | -             | MGE:ISPlu1+TSD                          |
| 31 | matchSEG | 985484-991486/F   | 6003  | 976960-982962/F   | 6003  | 0.08 | 6003/5/0/0    | -                                       |
| 32 | replace  | 991487-992353/F   | 867   | 982963-983901/F   | 939   | -    | -             | TT01m:specific ; DJC:InternallyRepeated |
| 32 | matchSEG | 992354-994509/F   | 2156  | 983902-986068/F   | 2167  | 0.42 | 2158/7/2/9    | -                                       |
| 33 | indel    | -                 | -     | 986069-986171/F   | 103   | -    | -             | specific                                |
| 33 | matchSEG | 994510-994769/F   | 260   | 986172-986431/F   | 260   | 0.77 | 260/2/0/0     | -                                       |
| 34 | indel    | -                 | -     | 986432-987582/F   | 1151  | -    | -             | MGE:ISPlu10+TSD                         |
| 34 | matchSEG | 994770-994865/F   | 96    | 987583-987678/F   | 96    | 0.00 | 96/0/0/0      | -                                       |
| 35 | copynr   | 994866-995019/F   | 154   | 987679-987762/F   | 84    | -    | -             | TATAATC(TT01m:22/ DJC:12)               |
| 35 | matchSEG | 995020-1035902/F  | 40883 | 987763-1028645/F  | 40883 | 0.01 | 40883/4/0/0   | -                                       |
| 36 | indel    | -                 | -     | 1028646-1028770/F | 125   | -    | -             | MGE:MITEPlu5+TSD                        |
| 36 | matchSEG | 1035903-1057588/F | 21686 | 1028771-1050470/F | 21700 | 0.14 | 21687/30/1/13 | -                                       |
| 37 | indel    | 1057589-1057713/F | 125   | -                 | -     | -    | -             | MGE:MITEPlu5+TSD                        |
| 37 | matchSEG | 1057714-1063159/F | 5446  | 1050471-1055893/F | 5423  | 0.85 | 5424/45/1/22  | -                                       |
| 38 | indel    | 1063160-1063284/F | 125   | -                 | -     | -    | -             | MGE:MITEPlu5+TSD                        |
| 38 | matchSEG | 1063285-1065823/F | 2539  | 1055894-1058440/F | 2547  | 2.20 | 2540/55/1/7   | DissimLocal                             |



|    |          |                   |       |                   |       |      |               |                                                                                 |
|----|----------|-------------------|-------|-------------------|-------|------|---------------|---------------------------------------------------------------------------------|
| 39 | copynr   | 1065824-1065968/F | 145   | 1058441-1058617/F | 177   | -    | -             | CTGTAAAA(TT01m:18/ DJC:22)                                                      |
| 39 | matchSEG | 1065969-1069039/F | 3071  | 1058618-1061688/F | 3071  | 1.56 | 3071/48/0/0   | DissimLocal                                                                     |
| 40 | indel    | -                 | -     | 1061689-1063451/F | 1763  | -    | -             | MGE:IRS113                                                                      |
| 40 | matchSEG | 1069040-1069484/F | 445   | 1063452-1063896/F | 445   | 4.72 | 445/21/0/0    | DissimButShort                                                                  |
| 41 | indel    | 1069485-1072895/F | 3411  | -                 | -     | -    | -             | InternallyRepeated                                                              |
| 41 | matchSEG | 1072896-1079629/F | 6734  | 1063897-1070630/F | 6734  | 0.07 | 6734/5/0/0    | -                                                                               |
| 42 | indel    | -                 | -     | 1070631-1070755/F | 125   | -    | -             | MGE:MITEPlu5+TSD                                                                |
| 42 | matchSEG | 1079630-1151793/F | 72164 | 1070756-1142921/F | 72166 | 0.09 | 72166/66/2/0  | -                                                                               |
| 43 | indel    | -                 | -     | 1142922-1143046/F | 125   | -    | -             | MGE:MITEPlu5                                                                    |
| 43 | matchSEG | 1151794-1177029/F | 25236 | 1143047-1168308/F | 25262 | 0.18 | 25237/44/1/25 | -                                                                               |
| 44 | replace  | 1177030-1178363/F | 1334  | 1168309-1170646/F | 2338  | -    | -             | TT01m:specific+SeqRelated+MGE:MITEPlu5 ;<br>DJC:specific+SeqRelated+MGE:ISPlu16 |
| 44 | matchSEG | 1178364-1238448/F | 60085 | 1170647-1230731/F | 60085 | 0.03 | 60085/20/0/0  | -                                                                               |
| 45 | indel    | 1238449-1240795/F | 2347  | -                 | -     | -    | -             | MGE:ISPlu20+TSD                                                                 |

|    |          |                   |        |                   |        |      |                 |                                                      |
|----|----------|-------------------|--------|-------------------|--------|------|-----------------|------------------------------------------------------|
| 45 | matchSEG | 1240796-1249089/F | 8294   | 1230732-1239025/F | 8294   | 0.01 | 8294/1/0/0      | -                                                    |
| 46 | indel    | 1249090-1328832/F | 79743  | -                 | -      | -    | -               | specific+InternallyRepeated+MGE:multi (prophage R04) |
| 46 | matchSEG | 1328833-1459482/F | 130650 | 1239026-1369700/F | 130675 | 0.22 | 130642/288/4/45 | -                                                    |
| 47 | indel    | -                 | -      | 1369701-1369822/F | 122    | -    | -               | MGE:IRS112+TSD                                       |
| 47 | matchSEG | 1459483-1494375/F | 34893  | 1369823-1404756/F | 34934  | 0.55 | 34892/189/4/47  | -                                                    |
| 48 | indel    | -                 | -      | 1404757-1404881/F | 125    | -    | -               | MGE:MITEPlu5+TSD                                     |
| 48 | matchSEG | 1494376-1534135/F | 39760  | 1404882-1444641/F | 39760  | 0.09 | 39760/36/0/0    | -                                                    |
| 49 | indel    | -                 | -      | 1444642-1444766/F | 125    | -    | -               | MGE:MITEPlu5+TSD                                     |
| 49 | matchSEG | 1534136-1561668/F | 27533  | 1444767-1472299/F | 27533  | 0.07 | 27533/19/0/0    | -                                                    |
| 50 | indel    | 1561669-1574013/F | 12345  | -                 | -      | -    | -               | InternallyRepeated (prophage R05)                    |
| 50 | matchSEG | 1574014-1588775/F | 14762  | 1472300-1487069/F | 14770  | 0.01 | 14763/0/1/7     | (prophage R05)                                       |
| 51 | indel    | 1588776-1600599/F | 11824  | -                 | -      | -    | -               | InternallyRepeated (prophage R05)                    |
| 51 | matchSEG | 1600600-1625285/F | 24686  | 1487070-1511755/F | 24686  | 0.05 | 24686/13/0/0    | -                                                    |

|    |          |                   |       |                   |       |      |               |                                                 |
|----|----------|-------------------|-------|-------------------|-------|------|---------------|-------------------------------------------------|
| 52 | approxl  | 1625286-1626789/F | 1504  | 1511756-1511758/F | 3     | -    | -             | TT01m:FewUnaligned ; DJC:MGE:ISPlu9+TSD         |
| 52 | matchSEG | 1626790-1629188/F | 2399  | 1511759-1514157/F | 2399  | 1.58 | 2399/38/0/0   | DissimLocal(PhRepA) (prophage R05)              |
| 53 | indel    | -                 | -     | 1514158-1517742/F | 3585  | -    | -             | InternallyRepeated(PhRepA)                      |
| 53 | matchSEG | 1629189-1684260/F | 55072 | 1517743-1572884/F | 55142 | 0.14 | 55073/75/1/69 | -                                               |
| 54 | indel    | -                 | -     | 1572885-1572995/F | 111   | -    | -             | 111-mer tandem repeated in DJC but not in TT01m |
| 54 | matchSEG | 1684261-1697419/F | 13159 | 1572996-1586154/F | 13159 | 0.15 | 13159/20/0/0  | -                                               |
| 55 | approxl  | 1697420-1697429/F | 10    | 1586155-1586284/F | 130   | -    | -             | TT01m:FewUnaligned ; DJC:MGE:MITEPlu5           |
| 55 | matchSEG | 1697430-1698399/F | 970   | 1586285-1587256/F | 972   | 1.85 | 971/17/1/1    | DissimButShort                                  |
| 56 | indel    | -                 | -     | 1587257-1587439/F | 183   | -    | -             | MGE:MITEPlu5+TSD                                |
| 56 | matchSEG | 1698400-1700078/F | 1679  | 1587440-1589117/F | 1678  | 2.08 | 1679/34/1/0   | DissimLocal                                     |
| 57 | approxl  | 1700079-1700080/F | 2     | 1589118-1590205/F | 1088  | -    | -             | TT01m:FewUnaligned ; DJC:MGE:ISPlu1+FewAdjacent |
| 57 | matchSEG | 1700081-1708742/F | 8662  | 1590206-1598898/F | 8693  | 0.84 | 8664/71/2/29  | -                                               |
| 58 | indel    | 1708743-1709841/F | 1099  | -                 | -     | -    | -             | MGE:ISPlu19+TSD                                 |

|    |          |                   |       |                   |       |      |               |                                                                                               |
|----|----------|-------------------|-------|-------------------|-------|------|---------------|-----------------------------------------------------------------------------------------------|
| 58 | matchSEG | 1709842-1766768/F | 56927 | 1598899-1655823/F | 56925 | 0.11 | 56926/59/2/2  | -                                                                                             |
| 59 | indel    | 1766769-1766893/F | 125   | -                 | -     | -    | -             | MGE:MITEPlu5+TSD                                                                              |
| 59 | matchSEG | 1766894-1774954/F | 8061  | 1655824-1663884/F | 8061  | 0.26 | 8061/21/0/0   | -                                                                                             |
| 60 | replace  | 1774955-1776793/F | 1839  | 1663885-1665326/F | 1442  | -    | -             | TT01m:specific+MGE:MITEPlu5+MGE:IRS66 ; DJC:specific                                          |
| 60 | matchSEG | 1776794-1781918/F | 5125  | 1665327-1670451/F | 5125  | 0.23 | 5125/12/0/0   | -                                                                                             |
| 61 | indel    | 1781919-1782047/F | 129   | -                 | -     | -    | -             | MGE:MITEPlu5+FewAdjacent                                                                      |
| 61 | matchSEG | 1782048-1812837/F | 30790 | 1670452-1701271/F | 30820 | 0.21 | 30791/65/1/29 | -                                                                                             |
| 62 | replace  | 1812838-1815842/F | 3005  | 1701272-1702044/F | 773   | -    | -             | TT01m:specific+SeqRelated ; DJC:specific+SeqRelated                                           |
| 62 | matchSEG | 1815843-1821817/F | 5975  | 1702045-1708015/F | 5971  | 1.66 | 5974/96/3/1   | DissimLocal                                                                                   |
| 63 | replace  | 1821818-1823965/F | 2148  | 1708016-1708419/F | 404   | -    | -             | TT01m:specific+MGE:ISPlu14+MGE:MITEPlu5 ; DJC:SeqRelated                                      |
| 63 | matchSEG | 1823966-1919226/F | 95261 | 1708420-1803599/F | 95180 | 0.05 | 95181/47/1/80 | -                                                                                             |
| 64 | replace  | 1919227-1925020/F | 5794  | 1803600-1860888/F | 57289 | -    | -             | TT01m:specific+MGE:multi ; DJC:specific+InternallyRepeated(indel_077)+MGE:IRS1 (prophage R06) |

|    |          |                   |       |                   |       |      |                |                                                                  |
|----|----------|-------------------|-------|-------------------|-------|------|----------------|------------------------------------------------------------------|
| 64 | matchSEG | 1925021-1965328/F | 40308 | 1860889-1901183/F | 40295 | 0.19 | 40297/74/2/11  | -                                                                |
| 65 | indel    | 1965329-1966325/F | 997   | -                 | -     | -    | -              | MGE:ISPlu6+TSD                                                   |
| 65 | matchSEG | 1966326-2023521/F | 57196 | 1901184-1958391/F | 57208 | 0.10 | 57197/59/1/11  | -                                                                |
| 66 | indel    | 2023522-2024620/F | 1099  | -                 | -     | -    | -              | MGE:ISPlu19+TSD                                                  |
| 66 | matchSEG | 2024621-2065555/F | 40935 | 1958392-1999329/F | 40938 | 0.05 | 40931/17/2/13  | -                                                                |
| 67 | indel    | -                 | -     | 1999330-2000481/F | 1152  | -    | -              | MGE:ISPlu16+TSD                                                  |
| 67 | matchSEG | 2065556-2081255/F | 15700 | 2000482-2016174/F | 15693 | 0.31 | 15694/47/1/6   | -                                                                |
| 68 | approxI  | 2081256-2081265/F | 10    | 2016175-2016296/F | 122   | -    | -              | TT01m:FewUnaligned ; DJC:MGE:MITEPlu5                            |
| 68 | matchSEG | 2081266-2081788/F | 523   | 2016297-2016809/F | 513   | 1.56 | 514/7/1/9      | DissimButShort                                                   |
| 69 | indel    | 2081789-2083562/F | 1774  | -                 | -     | -    | -              | MGE:ISPlu4+TSD                                                   |
| 69 | matchSEG | 2083563-2086293/F | 2731  | 2016810-2019587/F | 2778  | 0.22 | 2733/4/2/45    | -                                                                |
| 70 | replace  | 2086294-2086643/F | 350   | 2019588-2019947/F | 360   | -    | -              | TT01m:specific+SeqRelated+MGE:MITEPlu5 ; DJC:specific+SeqRelated |
| 70 | matchSEG | 2086644-2101375/F | 14732 | 2019948-2034686/F | 14739 | 1.26 | 14708/181/4/59 | DissimLocal                                                      |

|    |          |                   |       |                   |       |      |              |                                                                                   |
|----|----------|-------------------|-------|-------------------|-------|------|--------------|-----------------------------------------------------------------------------------|
| 71 | indel    | 2101376-2102371/F | 996   | -                 | -     | -    | -            | MGE:ISPlu6+TSD                                                                    |
| 71 | matchSEG | 2102372-2119117/F | 16746 | 2034687-2051432/F | 16746 | 0.08 | 16746/13/0/0 | -                                                                                 |
| 72 | indel    | 2119118-2119252/F | 135   | -                 | -     | -    | -            | MGE:MITEPlu5+FewAdjacent                                                          |
| 72 | matchSEG | 2119253-2126977/F | 7725  | 2051433-2059186/F | 7754  | 0.69 | 7723/51/2/35 | -                                                                                 |
| 73 | indel    | -                 | -     | 2059187-2059306/F | 120   | -    | -            | CRISPRdiff(2extra)                                                                |
| 73 | matchSEG | 2126978-2130960/F | 3983  | 2059307-2063228/F | 3922  | 0.59 | 3924/21/2/59 | -                                                                                 |
| 74 | indel    | 2130961-2132059/F | 1099  | -                 | -     | -    | -            | MGE:ISPlu3+TSD                                                                    |
| 74 | matchSEG | 2132060-2132809/F | 750   | 2063229-2063978/F | 750   | 2.13 | 751/14/2/0   | DissimButShort                                                                    |
| 75 | indel    | -                 | -     | 2063979-2064566/F | 588   | -    | -            | MGE:ISPlu2                                                                        |
| 75 | matchSEG | 2132810-2133410/F | 601   | 2064567-2065167/F | 601   | 0.67 | 601/4/0/0    | -                                                                                 |
| 76 | replace  | 2133411-2133558/F | 148   | 2065168-2066732/F | 1565  | -    | -            | TT01m:CRISPRdiff(2extra)+cas1_truncated ;<br>DJC:CRISPRdiff(8extra)+cas1_complete |
| 76 | matchSEG | 2133559-2134732/F | 1174  | 2066733-2067897/F | 1165  | 4.37 | 1166/50/1/8  | DissimButShort                                                                    |
| 77 | indel    | -                 | -     | 2067898-2100511/F | 32614 | -    | -            | specific+InternallyRepeated(replace_064)+MGE:IRS1 (prophage R08)                  |

|    |          |                   |       |                   |       |      |               |                          |
|----|----------|-------------------|-------|-------------------|-------|------|---------------|--------------------------|
| 77 | matchSEG | 2134733-2142057/F | 7325  | 2100512-2107836/F | 7325  | 0.72 | 7325/53/0/0   | -                        |
| 78 | indel    | -                 | -     | 2107837-2108076/F | 240   | -    | -             | CRISPRdiff(4extra)       |
| 78 | matchSEG | 2142058-2142385/F | 328   | 2108077-2108404/F | 328   | 0.00 | 328/0/0/0     | -                        |
| 79 | indel    | 2142386-2142685/F | 300   | -                 | -     | -    | -             | CRISPRdiff(5extra)       |
| 79 | matchSEG | 2142686-2145305/F | 2620  | 2108405-2111027/F | 2623  | 4.04 | 2621/105/1/2  | DissimLocal              |
| 80 | indel    | -                 | -     | 2111028-2111163/F | 136   | -    | -             | MGE:MITEPlu5+FewAdjacent |
| 80 | matchSEG | 2145306-2157410/F | 12105 | 2111164-2123268/F | 12105 | 2.45 | 12105/296/0/0 | DissimGlobal             |
| 81 | indel    | 2157411-2157535/F | 125   | -                 | -     | -    | -             | MGE:MITEPlu5+TSD         |
| 81 | matchSEG | 2157536-2167317/F | 9782  | 2123269-2133057/F | 9789  | 0.21 | 9783/20/1/6   | -                        |
| 82 | indel    | 2167318-2168313/F | 996   | -                 | -     | -    | -             | MGE:ISPlu6+TSD           |
| 82 | matchSEG | 2168314-2176804/F | 8491  | 2133058-2141548/F | 8491  | 0.00 | 8491/0/0/0    | -                        |
| 83 | indel    | 2176805-2183354/F | 6550  | -                 | -     | -    | -             | specific                 |
| 83 | matchSEG | 2183355-2206517/F | 23163 | 2141549-2164711/F | 23163 | 0.02 | 23163/5/0/0   | -                        |

|    |          |                           |       |                       |       |      |                    |                                                                                  |
|----|----------|---------------------------|-------|-----------------------|-------|------|--------------------|----------------------------------------------------------------------------------|
| 84 | indel    | 2206518-<br>2206640/<br>F | 123   | -                     | -     | -    | -                  | MGE:MITEPlu5                                                                     |
| 84 | matchSEG | 2206641-<br>2207756/<br>F | 1116  | 2164712-<br>2165827/F | 1116  | 0.09 | 1116/1/0/0         | -                                                                                |
| 85 | replace  | 2207757-<br>2221565/<br>F | 13809 | 2165828-<br>2169455/F | 3628  | -    | -                  | TT01m:specific+SeqRelated+MGE:multi ;<br>DJC:specific+SeqRelated+MGE:multi       |
| 85 | matchSEG | 2221566-<br>2268059/<br>F | 46494 | 2169456-<br>2215944/F | 46489 | 0.15 | 46490/69/1/4       | -                                                                                |
| 86 | indel    | 2268060-<br>2271136/<br>F | 3077  | -                     | -     | -    | -                  | InternallyRepeated                                                               |
| 86 | matchSEG | 2271137-<br>2338602/<br>F | 67466 | 2215945-<br>2283386/F | 67442 | 0.01 | 67443/6/1/23       | -                                                                                |
| 87 | indel    | -                         | -     | 2283387-<br>2283974/F | 588   | -    | -                  | MGE:ISPlu2                                                                       |
| 87 | matchSEG | 2338603-<br>2373147/<br>F | 34545 | 2283975-<br>2318445/F | 34471 | 0.14 | 34459/44/4/10<br>2 | -                                                                                |
| 88 | indel    | -                         | -     | 2318446-<br>2319033/F | 588   | -    | -                  | MGE:ISPlu2                                                                       |
| 88 | matchSEG | 2373148-<br>2392119/<br>F | 18972 | 2319034-<br>2338005/F | 18972 | 0.01 | 18972/1/0/0        | -                                                                                |
| 89 | replace  | 2392120-<br>2392179/<br>F | 60    | 2338006-<br>2338366/F | 361   | -    | -                  | TT01m:CRISPRdiff(1shared) ; DJC:CRISPRdiff(5extra,1shared)                       |
| 89 | matchSEG | 2392180-<br>2395499/<br>F | 3320  | 2338367-<br>2341686/F | 3320  | 0.00 | 3320/0/0/0         | -                                                                                |
| 90 | replace  | 2395500-<br>2395799/<br>F | 300   | 2341687-<br>2341806/F | 120   | -    | -                  | TT01m:CRISPRdiff(2extra,2shared,1duplicated) ;<br>DJC:CRISPRdiff(2extra,2shared) |



|    |          |                   |      |                   |       |      |              |                                                            |
|----|----------|-------------------|------|-------------------|-------|------|--------------|------------------------------------------------------------|
| 90 | matchSEG | 2395800-2396028/F | 229  | 2341807-2342035/F | 229   | 0.44 | 229/1/0/0    | -                                                          |
| 91 | indel    | -                 | -    | 2342036-2376474/F | 34439 | -    | -            | specific+InternallyRepeated (prophage R10)                 |
| 91 | matchSEG | 2396029-2400961/F | 4933 | 2376475-2381407/F | 4933  | 0.12 | 4933/6/0/0   | -                                                          |
| 92 | indel    | 2400962-2401086/F | 125  | -                 | -     | -    | -            | MGE:MITEPlu5+TSD                                           |
| 92 | matchSEG | 2401087-2405369/F | 4283 | 2381408-2385652/F | 4245  | 0.64 | 4247/25/2/36 | -                                                          |
| 93 | replace  | 2405370-2406745/F | 1376 | 2385653-2387110/F | 1458  | -    | -            | TT01m:specific+SeqRelated ; DJC:specific+SeqRelated        |
| 93 | matchSEG | 2406746-2409581/F | 2836 | 2387111-2389946/F | 2836  | 1.23 | 2836/35/0/0  | DissimLocal                                                |
| 94 | replace  | 2409582-2409724/F | 143  | 2389947-2390866/F | 920   | -    | -            | TT01m:MGE:MITEPlu5+FewAdjacent ; DJC:specific+MGE:MITEPlu5 |
| 94 | matchSEG | 2409725-2418046/F | 8322 | 2390867-2399188/F | 8322  | 0.14 | 8322/12/0/0  | -                                                          |
| 95 | indel    | 2418047-2419145/F | 1099 | -                 | -     | -    | -            | MGE:ISPlu3+TSD                                             |
| 95 | matchSEG | 2419146-2427929/F | 8784 | 2399189-2407963/F | 8775  | 0.13 | 8776/10/1/8  | -                                                          |
| 96 | indel    | -                 | -    | 2407964-2408088/F | 125   | -    | -            | MGE:MITEPlu5+TSD                                           |
| 96 | matchSEG | 2427930-2433968/F | 6039 | 2408089-2414110/F | 6022  | 1.13 | 6023/67/1/16 | DissimLocal                                                |

|     |          |                           |       |                       |       |       |              |                                                      |
|-----|----------|---------------------------|-------|-----------------------|-------|-------|--------------|------------------------------------------------------|
| 97  | indel    | -                         | -     | 2414111-<br>2414782/F | 672   | -     | -            | InternallyRepeated                                   |
| 97  | matchSEG | 2433969-<br>2475431/<br>F | 41463 | 2414783-<br>2456241/F | 41459 | 0.17  | 41460/68/1/3 | -                                                    |
| 98  | replace  | 2475432-<br>2475703/<br>F | 272   | 2456242-<br>2457815/F | 1574  | -     | -            | TT01m:CRISPRdiff(5extra) ; DJC:CRISPRdiff(27extra)   |
| 98  | matchSEG | 2475704-<br>2476256/<br>F | 553   | 2457816-<br>2458394/F | 579   | 11.03 | 553/59/2/28  | DissimButShort                                       |
| 99  | replace  | 2476257-<br>2476519/<br>F | 263   | 2458395-<br>2458493/F | 99    | -     | -            | TT01m:specific+MGE:MITEPlu5 ; DJC:InternallyRepeated |
| 99  | matchSEG | 2476520-<br>2484138/<br>F | 7619  | 2458494-<br>2466131/F | 7638  | 0.25  | 7620/17/2/19 | -                                                    |
| 100 | indel    | 2484139-<br>2484263/<br>F | 125   | -                     | -     | -     | -            | MGE:MITEPlu5+TSD                                     |
| 100 | matchSEG | 2484264-<br>2528318/<br>F | 44055 | 2466132-<br>2510187/F | 44056 | 0.06  | 44056/26/1/0 | -                                                    |
| 101 | indel    | 2528319-<br>2528443/<br>F | 125   | -                     | -     | -     | -            | MGE:MITEPlu5                                         |
| 101 | matchSEG | 2528444-<br>2537638/<br>F | 9195  | 2510188-<br>2519382/F | 9195  | 0.24  | 9195/22/0/0  | -                                                    |
| 102 | approxl  | 2537639-<br>2537639/<br>F | 1     | 2519383-<br>2520461/F | 1079  | -     | -            | TT01m:OneUnaligned ; DJC:specific                    |
| 102 | matchSEG | 2537640-<br>2576718/<br>F | 39079 | 2520462-<br>2559550/F | 39089 | 0.10  | 39082/35/4/8 | -                                                    |
| 103 | indel    | 2576719-<br>2576899/<br>F | 181   | -                     | -     | -     | -            | specific                                             |

|     |          |                           |      |                       |      |      |              |                                              |
|-----|----------|---------------------------|------|-----------------------|------|------|--------------|----------------------------------------------|
| 103 | matchSEG | 2576900-<br>2577127/<br>F | 228  | 2559551-<br>2559778/F | 228  | 0.88 | 228/2/0/0    | -                                            |
| 104 | indel    | 2577128-<br>2581898/<br>F | 4771 | -                     | -    | -    | -            | specific                                     |
| 104 | matchSEG | 2581899-<br>2582817/<br>F | 919  | 2559779-<br>2560697/F | 919  | 4.02 | 920/35/2/0   | DissimButShort                               |
| 105 | indel    | 2582818-<br>2586153/<br>F | 3336 | -                     | -    | -    | -            | specific                                     |
| 105 | matchSEG | 2586154-<br>2586539/<br>F | 386  | 2560698-<br>2561083/F | 386  | 0.52 | 386/2/0/0    | -                                            |
| 106 | indel    | 2586540-<br>2589438/<br>F | 2899 | -                     | -    | -    | -            | specific+MGE:IRS112                          |
| 106 | matchSEG | 2589439-<br>2597529/<br>F | 8091 | 2561084-<br>2569174/F | 8091 | 3.09 | 8091/250/0/0 | DissimGlobal                                 |
| 107 | replace  | 2597530-<br>2598953/<br>F | 1424 | 2569175-<br>2569232/F | 58   | -    | -            | TT01m:InternallyRepeated ; DJC:specific      |
| 107 | matchSEG | 2598954-<br>2600653/<br>F | 1700 | 2569233-<br>2570932/F | 1700 | 4.53 | 1700/77/0/0  | DissimButShort                               |
| 108 | replace  | 2600654-<br>2604306/<br>F | 3653 | 2570933-<br>2573366/F | 2434 | -    | -            | TT01m:specific ; DJC:specific                |
| 108 | matchSEG | 2604307-<br>2604413/<br>F | 107  | 2573367-<br>2573473/F | 107  | 1.87 | 107/2/0/0    | DissimButShort                               |
| 109 | replace  | 2604414-<br>2604534/<br>F | 121  | 2573474-<br>2573515/F | 42   | -    | -            | TT01m:MGE:MITEPlu5 ; DJC: InternallyRepeated |

|     |          |                           |       |                       |       |      |               |                                                                        |
|-----|----------|---------------------------|-------|-----------------------|-------|------|---------------|------------------------------------------------------------------------|
| 109 | matchSEG | 2604535-<br>2604961/<br>F | 427   | 2573516-<br>2573884/F | 369   | 8.60 | 372/29/3/55   | DissimButShort                                                         |
| 110 | indel    | 2604962-<br>2605086/<br>F | 125   | -                     | -     | -    | -             | MGE:MITEPlu5+TSD                                                       |
| 110 | matchSEG | 2605087-<br>2614481/<br>F | 9395  | 2573885-<br>2583279/F | 9395  | 1.03 | 9395/97/0/0   | DissimLocal                                                            |
| 111 | replace  | 2614482-<br>2614510/<br>F | 29    | 2583280-<br>2583587/F | 308   | -    | -             | TT01m:specific ; DJC:specific                                          |
| 111 | matchSEG | 2614511-<br>2615185/<br>F | 675   | 2583588-<br>2584367/F | 780   | 2.97 | 674/16/4/111  | DissimButShort                                                         |
| 112 | indel    | -                         | -     | 2584368-<br>2585068/F | 701   | -    | -             | specific+MGE:MITEPlu5                                                  |
| 112 | matchSEG | 2615186-<br>2620126/<br>F | 4941  | 2585069-<br>2590009/F | 4941  | 0.12 | 4941/6/0/0    | -                                                                      |
| 113 | approxl  | 2620127-<br>2620128/<br>F | 2     | 2590010-<br>2590147/F | 138   | -    | -             | TT01m:FewUnaligned ; DJC:MGE:MITEPlu5+FewAdjacent                      |
| 113 | matchSEG | 2620129-<br>2621190/<br>F | 1062  | 2590148-<br>2591209/F | 1062  | 0.47 | 1062/5/0/0    | -                                                                      |
| 114 | replace  | 2621191-<br>2621351/<br>F | 161   | 2591210-<br>2591278/F | 69    | -    | -             | TT01m:specific ; DJC:specific                                          |
| 114 | matchSEG | 2621352-<br>2646906/<br>F | 25555 | 2591279-<br>2616833/F | 25555 | 0.07 | 25555/18/0/0  | -                                                                      |
| 115 | replace  | 2646907-<br>2649865/<br>F | 2959  | 2616834-<br>2619783/F | 2950  | -    | -             | TT01m:specific+SeqRelated+MGE:ISPlu11+TSD ;<br>DJC:specific+SeqRelated |
| 115 | matchSEG | 2649866-<br>2663034/<br>F | 13169 | 2619784-<br>2632938/F | 13155 | 0.55 | 13152/69/3/23 | -                                                                      |

|     |          |                           |       |                       |       |      |                     |                                                                |
|-----|----------|---------------------------|-------|-----------------------|-------|------|---------------------|----------------------------------------------------------------|
| 116 | replace  | 2663035-<br>2664518/<br>F | 1484  | 2632939-<br>2632968/F | 30    | -    | -                   | TT01m:specific+MGE:MITEPlu5 ; DJC:specific                     |
| 116 | matchSEG | 2664519-<br>2677661/<br>F | 13143 | 2632969-<br>2646110/F | 13142 | 0.04 | 13143/4/1/0         | -                                                              |
| 117 | indel    | 2677662-<br>2678747/<br>F | 1086  | -                     | -     | -    | -                   | MGE:ISPlu1+TSD                                                 |
| 117 | matchSEG | 2678748-<br>2710860/<br>F | 32113 | 2646111-<br>2678187/F | 32077 | 0.26 | 32079/81/2/34       | -                                                              |
| 118 | indel    | 2710861-<br>2711959/<br>F | 1099  | -                     | -     | -    | -                   | MGE:ISPlu3+TSD                                                 |
| 118 | matchSEG | 2711960-<br>2786856/<br>F | 74897 | 2678188-<br>2753064/F | 74877 | 0.20 | 74878/139/10/<br>28 | -                                                              |
| 119 | replace  | 2786857-<br>2787652/<br>F | 796   | 2753065-<br>2753148/F | 84    | -    | -                   | TT01m:specific ; DJC:specific                                  |
| 119 | matchSEG | 2787653-<br>2834238/<br>F | 46586 | 2753149-<br>2799715/F | 46567 | 0.03 | 46568/13/1/18       | -                                                              |
| 120 | indel    | 2834239-<br>2835389/<br>F | 1151  | -                     | -     | -    | -                   | MGE:ISPlu10+TSD                                                |
| 120 | matchSEG | 2835390-<br>2883434/<br>F | 48045 | 2799716-<br>2847788/F | 48073 | 0.51 | 48018/242/5/8<br>7  | -                                                              |
| 121 | indel    | -                         | -     | 2847789-<br>2848376/F | 588   | -    | -                   | MGE:ISPlu2                                                     |
| 121 | matchSEG | 2883435-<br>2908250/<br>F | 24816 | 2848377-<br>2873192/F | 24816 | 0.01 | 24816/3/0/0         | -                                                              |
| 122 | approxl  | 2908251-<br>2918654/<br>F | 10404 | 2873193-<br>2873196/F | 4     | -    | -                   | TT01m:specific+InternallyRepeated+MGE:multi ; DJC:FewUnaligned |

|     |          |                   |       |                   |       |      |                 |                                                                                        |
|-----|----------|-------------------|-------|-------------------|-------|------|-----------------|----------------------------------------------------------------------------------------|
| 122 | matchSEG | 2918655-2981457/F | 62803 | 2873197-2935980/F | 62784 | 0.26 | 62771/152/10/55 | -                                                                                      |
| 123 | indel    | -                 | -     | 2935981-2936105/F | 125   | -    | -               | MGE:MITEPlu5+TSD                                                                       |
| 123 | matchSEG | 2981458-3007796/F | 26339 | 2936106-2962434/F | 26329 | 0.06 | 26330/15/1/9    | -                                                                                      |
| 124 | indel    | -                 | -     | 2962435-2962559/F | 125   | -    | -               | MGE:MITEPlu5+TSD                                                                       |
| 124 | matchSEG | 3007797-3011590/F | 3794  | 2962560-2966349/F | 3790  | 0.32 | 3791/11/1/3     | -                                                                                      |
| 125 | indel    | 3011591-3011693/F | 103   | -                 | -     | -    | -               | MGE: MITEPlu2+TSD                                                                      |
| 125 | matchSEG | 3011694-3011792/F | 99    | 2966350-2966448/F | 99    | 1.01 | 99/1/0/0        | DissimButShort                                                                         |
| 126 | indel    | 3011793-3011917/F | 125   | -                 | -     | -    | -               | MGE:MITEPlu5+TSD                                                                       |
| 126 | matchSEG | 3011918-3015578/F | 3661  | 2966449-2970109/F | 3661  | 0.68 | 3661/25/0/0     | -                                                                                      |
| 127 | replace  | 3015579-3016374/F | 796   | 2970110-2972199/F | 2090  | -    | -               | TT01m:InternallyRepeated+SeqRelated ;<br>DJC:InternallyRepeated+SeqRelated+MGE:ISPlu10 |
| 127 | matchSEG | 3016375-3021310/F | 4936  | 2972200-2977134/F | 4935  | 0.61 | 4936/29/1/0     | -                                                                                      |
| 128 | indel    | -                 | -     | 2977135-2977259/F | 125   | -    | -               | MGE:MITEPlu5+TSD                                                                       |
| 128 | matchSEG | 3021311-3035442/F | 14132 | 2977260-2991391/F | 14132 | 0.33 | 14132/46/0/0    | -                                                                                      |
| 129 | indel    | -                 | -     | 2991392-2991515/F | 124   | -    | -               | MGE:MITEPlu5                                                                           |

|     |          |                   |        |                   |        |      |                 |                                            |
|-----|----------|-------------------|--------|-------------------|--------|------|-----------------|--------------------------------------------|
| 129 | matchSEG | 3035443-3096501/F | 61059  | 2991516-3052575/F | 61060  | 0.30 | 61061/183/3/0   | -                                          |
| 130 | indel    | -                 | -      | 3052576-3053498/F | 923    | -    | -               | MGE:ISPlu7+TSD                             |
| 130 | matchSEG | 3096502-3103995/F | 7494   | 3053499-3061008/F | 7510   | 4.42 | 7496/329/2/14   | DissimGlobal                               |
| 131 | replace  | 3103996-3104659/F | 664    | 3061009-3061093/F | 85     | -    | -               | TT01m:specific+MGE:MITEPlu5 ; DJC:specific |
| 131 | matchSEG | 3104660-3105848/F | 1189   | 3061094-3062279/F | 1186   | 6.09 | 1183/68/4/13    | DissimButShort                             |
| 132 | indel    | -                 | -      | 3062280-3063430/F | 1151   | -    | -               | MGE:ISPlu10+TSD                            |
| 132 | matchSEG | 3105849-3106370/F | 522    | 3063431-3063978/F | 548    | 7.06 | 524/33/4/26     | DissimButShort                             |
| 133 | approxl  | 3106371-3106497/F | 127    | 3063979-3063980/F | 2      | -    | -               | TT01m:MGE:MITEPlu5 ; DJC:FewUnaligned      |
| 133 | matchSEG | 3106498-3107025/F | 528    | 3063981-3064409/F | 429    | 8.56 | 432/33/4/97     | DissimButShort                             |
| 134 | indel    | -                 | -      | 3064410-3064997/F | 588    | -    | -               | MGE:ISPlu2                                 |
| 134 | matchSEG | 3107026-3209689/F | 102664 | 3064998-3167722/F | 102725 | 0.72 | 102670/727/9/58 | -                                          |
| 135 | indel    | -                 | -      | 3167723-3167847/F | 125    | -    | -               | MGE:MITEPlu5+TSD                           |
| 135 | matchSEG | 3209690-3254327/F | 44638  | 3167848-3212485/F | 44638  | 0.11 | 44638/50/0/0    | -                                          |
| 136 | indel    | 3254328-3255426/F | 1099   | -                 | -      | -    | -               | MGE:ISPlu19+TSD                            |

|     |          |                   |       |                   |       |      |               |                            |
|-----|----------|-------------------|-------|-------------------|-------|------|---------------|----------------------------|
| 136 | matchSEG | 3255427-3285184/F | 29758 | 3212486-3242243/F | 29758 | 0.09 | 29758/26/0/0  | -                          |
| 137 | copynr   | 3285185-3285429/F | 245   | 3242244-3242299/F | 56    | -    | -             | TTACAGA(TT01m:36/ DJC:16)  |
| 137 | matchSEG | 3285430-3327919/F | 42490 | 3242300-3284773/F | 42474 | 0.01 | 42460/1/3/47  | -                          |
| 138 | indel    | -                 | -     | 3284774-3285872/F | 1099  | -    | -             | MGE:ISPlu3+TSD             |
| 138 | matchSEG | 3327920-3374997/F | 47078 | 3285873-3332950/F | 47078 | 0.01 | 47078/3/0/0   | -                          |
| 139 | copynr   | 3374998-3375301/F | 304   | 3332951-3333094/F | 144   | -    | -             | TTAGTTTA(TT01m:38/ DJC:18) |
| 139 | matchSEG | 3375302-3392450/F | 17149 | 3333095-3350243/F | 17149 | 0.07 | 17149/12/0/0  | -                          |
| 140 | indel    | -                 | -     | 3350244-3350389/F | 146   | -    | -             | MGE:MITEPlu5+FewAdjacent   |
| 140 | matchSEG | 3392451-3409412/F | 16962 | 3350390-3367392/F | 17003 | 0.24 | 16963/40/1/40 | -                          |
| 141 | indel    | 3409413-3456242/F | 46830 | -                 | -     | -    | -             | specific(prophage R14)     |
| 141 | matchSEG | 3456243-3458735/F | 2493  | 3367393-3369945/F | 2553  | 0.60 | 2494/14/1/59  | -                          |
| 142 | indel    | 3458736-3459834/F | 1099  | -                 | -     | -    | -             | MGE:ISPlu3+TSD             |
| 142 | matchSEG | 3459835-3460194/F | 360   | 3369946-3370304/F | 359   | 4.17 | 360/14/1/0    | DissimButShort             |



|     |          |                   |       |                   |       |      |                |                                                            |
|-----|----------|-------------------|-------|-------------------|-------|------|----------------|------------------------------------------------------------|
| 143 | replace  | 3460195-3460321/F | 127   | 3370305-3370584/F | 280   | -    | -              | TT01m:specific ; DJC:specific                              |
| 143 | matchSEG | 3460322-3463572/F | 3251  | 3370585-3373835/F | 3251  | 0.40 | 3251/13/0/0    | -                                                          |
| 144 | replace  | 3463573-3465146/F | 1574  | 3373836-3373911/F | 76    | -    | -              | TT01m:specific ; DJC:specific                              |
| 144 | matchSEG | 3465147-3468379/F | 3233  | 3373912-3377144/F | 3233  | 1.21 | 3233/39/0/0    | DissimLocal                                                |
| 145 | replace  | 3468380-3468748/F | 369   | 3377145-3378556/F | 1412  | -    | -              | TT01m:specific+MGE:MITEPlu5 ; DJC:specific+MGE:MITEPlu5    |
| 145 | matchSEG | 3468749-3470269/F | 1521  | 3378557-3380077/F | 1521  | 0.66 | 1521/10/0/0    | -                                                          |
| 146 | replace  | 3470270-3470872/F | 603   | 3380078-3381245/F | 1168  | -    | -              | TT01m:specific+MGE:MITEPlu5 ; DJC:specific+MGE:MITEPlu5    |
| 146 | matchSEG | 3470873-3508332/F | 37460 | 3381246-3418688/F | 37443 | 0.57 | 37445/211/3/16 | -                                                          |
| 147 | replace  | 3508333-3514107/F | 5775  | 3418689-3421693/F | 3005  | -    | -              | TT01m:specific(prophage R14) ; DJC:specific (prophage R14) |
| 147 | matchSEG | 3514108-3514935/F | 828   | 3421694-3422521/F | 828   | 3.86 | 828/32/0/0     | DissimButShort(prophage)                                   |
| 148 | matchSEG | 3514936-3522867/R | 7932  | 3422522-3430453/F | 7932  | 0.23 | 7936/10/8/0    | inverted between TT01m and DJC (prophage R14)              |
| 149 | matchSEG | 3522868-3536790/F | 13923 | 3430454-3444375/F | 13922 | 1.60 | 13924/220/3/0  | DissimLocal(prophage R14)                                  |

|     |          |                   |       |                   |       |      |                |                                       |
|-----|----------|-------------------|-------|-------------------|-------|------|----------------|---------------------------------------|
| 150 | indel    | 3536791-3536915/F | 125   | -                 | -     | -    | -              | MGE:MITEPlu5+TSD                      |
| 150 | matchSEG | 3536916-3563637/F | 26722 | 3444376-3471105/F | 26730 | 0.21 | 26713/55/2/28  | -                                     |
| 151 | indel    | -                 | -     | 3471106-3472879/F | 1774  | -    | -              | MGE:ISPlu4+TSD                        |
| 151 | matchSEG | 3563638-3617331/F | 53694 | 3472880-3526573/F | 53694 | 0.38 | 53694/205/0/0  | -                                     |
| 152 | indel    | 3617332-3618482/F | 1151  | -                 | -     | -    | -              | MGE:ISPlu10+TSD                       |
| 152 | matchSEG | 3618483-3663762/F | 45280 | 3526574-3571849/F | 45276 | 0.23 | 45272/103/2/14 | -                                     |
| 153 | indel    | 3663763-3663887/F | 125   | -                 | -     | -    | -              | MGE:MITEPlu5+TSD                      |
| 153 | matchSEG | 3663888-3745593/F | 81706 | 3571850-3653542/F | 81693 | 0.16 | 81696/131/3/10 | -                                     |
| 154 | indel    | -                 | -     | 3653543-3653667/F | 125   | -    | -              | MGE:MITEPlu5+TSD                      |
| 154 | matchSEG | 3745594-3769917/F | 24324 | 3653668-3677982/F | 24315 | 0.58 | 24306/138/3/30 | -                                     |
| 155 | approxl  | 3769918-3770049/F | 132   | 3677983-3677989/F | 7     | -    | -              | TT01m:MGE:MITEPlu5 ; DJC:FewUnaligned |
| 155 | matchSEG | 3770050-3777796/F | 7747  | 3677990-3685739/F | 7750  | 0.67 | 7748/51/1/2    | -                                     |
| 156 | indel    | 3777797-3778793/F | 997   | -                 | -     | -    | -              | MGE:ISPlu6+TSD                        |

|     |          |                   |       |                   |       |      |               |                                                    |
|-----|----------|-------------------|-------|-------------------|-------|------|---------------|----------------------------------------------------|
| 156 | matchSEG | 3778794-3835798/F | 57005 | 3685740-3742738/F | 56999 | 0.49 | 57000/279/1/5 | -                                                  |
| 157 | replace  | 3835799-3840551/F | 4753  | 3742739-3747501/F | 4763  | -    | -             | TT01m:InternallyRepeated ; DJC:InternallyRepeated  |
| 157 | matchSEG | 3840552-3843354/F | 2803  | 3747502-3750304/F | 2803  | 0.89 | 2803/25/0/0   | -                                                  |
| 158 | approxl  | 3843355-3843357/F | 3     | 3750305-3750410/F | 106   | -    | -             | TT01m:FewUnaligned ; DJC:MGE: MITEPlu2+FewAdjacent |
| 158 | matchSEG | 3843358-3857816/F | 14459 | 3750411-3764869/F | 14459 | 0.46 | 14459/67/0/0  | -                                                  |
| 159 | indel    | 3857817-3860163/F | 2347  | -                 | -     | -    | -             | MGE:ISPlu20+TSD                                    |
| 159 | matchSEG | 3860164-3886545/F | 26382 | 3764870-3791251/F | 26382 | 0.00 | 26382/0/0/0   | -                                                  |
| 160 | indel    | 3886546-3887696/F | 1151  | -                 | -     | -    | -             | MGE:ISPlu10+TSD                                    |
| 160 | matchSEG | 3887697-3914434/F | 26738 | 3791252-3817989/F | 26738 | 0.00 | 26738/0/0/0   | -                                                  |
| 161 | indel    | -                 | -     | 3817990-3819088/F | 1099  | -    | -             | MGE:ISPlu3+TSD                                     |
| 161 | matchSEG | 3914435-3923547/F | 9113  | 3819089-3828201/F | 9113  | 0.20 | 9113/18/0/0   | -                                                  |
| 162 | indel    | 3923548-3924543/F | 996   | -                 | -     | -    | -             | MGE:ISPlu6+TSD                                     |
| 162 | matchSEG | 3924544-3941300/F | 16757 | 3828202-3844961/F | 16760 | 0.22 | 16758/36/1/2  | -                                                  |

|     |          |                   |       |                   |       |      |              |                                               |
|-----|----------|-------------------|-------|-------------------|-------|------|--------------|-----------------------------------------------|
| 163 | indel    | 3941301-3942223/F | 923   | -                 | -     | -    | -            | MGE:ISPlu7+TSD                                |
| 163 | matchSEG | 3942224-3948594/F | 6371  | 3844962-3851319/F | 6358  | 0.71 | 6360/43/2/11 | -                                             |
| 164 | indel    | -                 | -     | 3851320-3852313/F | 994   | -    | -            | MGE:ISPlu11+TSD                               |
| 164 | matchSEG | 3948595-3960593/F | 11999 | 3852314-3864312/F | 11999 | 0.02 | 11999/2/0/0  | -                                             |
| 165 | indel    | -                 | -     | 3864313-3865398/F | 1086  | -    | -            | MGE:ISPlu1+TSD                                |
| 165 | matchSEG | 3960594-3965592/F | 4999  | 3865399-3870395/F | 4997  | 1.02 | 4999/49/2/0  | DissimLocal                                   |
| 166 | indel    | 3965593-3965717/F | 125   | -                 | -     | -    | -            | MGE:MITEPlu5+TSD                              |
| 166 | matchSEG | 3965718-3981210/F | 15493 | 3870396-3885889/F | 15494 | 0.16 | 15494/24/1/0 | -                                             |
| 167 | indel    | 3981211-3982309/F | 1099  | -                 | -     | -    | -            | MGE:ISPlu19+TSD                               |
| 167 | matchSEG | 3982310-3984852/F | 2543  | 3885890-3888432/F | 2543  | 0.04 | 2543/1/0/0   | -                                             |
| 168 | indel    | 3984853-3986003/F | 1151  | -                 | -     | -    | -            | MGE:ISPlu10+TSD                               |
| 168 | matchSEG | 3986004-4006407/F | 20404 | 3888433-3908836/F | 20404 | 0.03 | 20404/7/0/0  | -                                             |
| 169 | indel    | 4006408-4085197/F | 78790 | -                 | -     | -    | -            | specific(prophage R16)+MGE:ISPlu7+MGE:ISPlu19 |

|     |          |                   |        |                   |        |      |                   |                                                           |
|-----|----------|-------------------|--------|-------------------|--------|------|-------------------|-----------------------------------------------------------|
| 169 | matchSEG | 4085198-4205846/F | 120649 | 3908837-4029444/F | 120608 | 0.23 | 120566/260/13/138 | -                                                         |
| 170 | indel    | 4205847-4206945/F | 1099   | -                 | -      | -    | -                 | MGE:ISPlu19+TSD                                           |
| 170 | matchSEG | 4206946-4207003/F | 58     | 4029445-4029502/F | 58     | 0.00 | 58/0/0/0          | -                                                         |
| 171 | copynr   | 4207004-4207549/F | 546    | 4029503-4030123/F | 621    | -    | -                 | GTTTTACAG(TT01m:46/ DJC:49)+GTTAAACTATC(TT01m:11/ DJC:15) |
| 171 | matchSEG | 4207550-4218332/F | 10783  | 4030124-4040906/F | 10783  | 0.00 | 10783/0/0/0       | -                                                         |
| 172 | indel    | 4218333-4244937/F | 26605  | -                 | -      | -    | -                 | InternallyRepeated(PhRepA)+MGE:ISPlu9                     |
| 172 | matchSEG | 4244938-4251874/F | 6937   | 4040907-4047843/F | 6937   | 1.99 | 6937/138/0/0      | DissimLocal(PhRepA)                                       |
| 173 | indel    | 4251875-4252224/F | 350    | -                 | -      | -    | -                 | specific+MGE:MITEPlu5                                     |
| 173 | matchSEG | 4252225-4260991/F | 8767   | 4047844-4056612/F | 8769   | 1.15 | 8768/100/1/1      | DissimLocal                                               |
| 174 | indel    | -                 | -      | 4056613-4056737/F | 125    | -    | -                 | MGE:MITEPlu5                                              |
| 174 | matchSEG | 4260992-4265840/F | 4849   | 4056738-4061589/F | 4852   | 3.34 | 4821/153/8/67     | DissimGlobal                                              |
| 175 | approxl  | 4265841-4266016/F | 176    | 4061590-4061596/F | 7      | -    | -                 | TT01m:specific+MGE:MITEPlu5 ; DJC:FewUnaligned            |
| 175 | matchSEG | 4266017-4355785/F | 89769  | 4061597-4151386/F | 89790  | 0.13 | 89770/111/2/21    | -                                                         |

|     |          |                   |       |                   |       |      |              |                                                                      |
|-----|----------|-------------------|-------|-------------------|-------|------|--------------|----------------------------------------------------------------------|
| 176 | indel    | -                 | -     | 4151387-4153733/F | 2347  | -    | -            | MGE:ISPlu20+TSD                                                      |
| 176 | matchSEG | 4355786-4357367/F | 1582  | 4153734-4155315/F | 1582  | 0.00 | 1582/0/0/0   | -                                                                    |
| 177 | indel    | -                 | -     | 4155316-4156591/F | 1276  | -    | -            | InternallyRepeated(PhRepA) (prophage R17)                            |
| 177 | matchSEG | 4357368-4358242/F | 875   | 4156592-4157458/F | 867   | 6.32 | 870/52/3/5   | DissimButShort(PhRepA)                                               |
| 178 | indel    | -                 | -     | 4157459-4188522/F | 31064 | -    | -            | InternallyRepeated(PhRepA) (prophage R17)                            |
| 178 | matchSEG | 4358243-4362674/F | 4432  | 4188523-4192954/F | 4432  | 0.45 | 4432/20/0/0  | -                                                                    |
| 179 | replace  | 4362675-4373635/F | 10961 | 4192955-4195357/F | 2403  | -    | -            | TT01m:InternallyRepeated(PhRepA) ;<br>DJC:InternallyRepeated(PhRepA) |
| 179 | matchSEG | 4373636-4377315/F | 3680  | 4195358-4199037/F | 3680  | 0.41 | 3680/15/0/0  | -                                                                    |
| 180 | replace  | 4377316-4379785/F | 2470  | 4199038-4201087/F | 2050  | -    | -            | TT01m:InternallyRepeated(PhRepA) ;<br>DJC:InternallyRepeated(PhRepA) |
| 180 | matchSEG | 4379786-4386331/F | 6546  | 4201088-4207634/F | 6547  | 2.76 | 6547/180/1/0 | DissimGlobal(PhRepA)                                                 |
| 181 | indel    | 4386332-4387430/F | 1099  | -                 | -     | -    | -            | MGE:ISPlu19+TSD                                                      |
| 181 | matchSEG | 4387431-4394212/F | 6782  | 4207635-4214416/F | 6782  | 0.01 | 6782/1/0/0   | -                                                                    |
| 182 | indel    | 4394213-4395311/F | 1099  | -                 | -     | -    | -            | MGE:ISPlu19+TSD                                                      |

|     |          |                   |        |                   |        |      |                 |                |
|-----|----------|-------------------|--------|-------------------|--------|------|-----------------|----------------|
| 182 | matchSEG | 4395312-4399578/F | 4267   | 4214417-4218683/F | 4267   | 0.40 | 4267/17/0/0     | -              |
| 183 | indel    | 4399579-4401704/F | 2126   | -                 | -      | -    | -               | specific       |
| 183 | matchSEG | 4401705-4402937/F | 1233   | 4218684-4219916/F | 1233   | 0.49 | 1233/6/0/0      | -              |
| 184 | indel    | -                 | -      | 4219917-4221002/F | 1086   | -    | -               | MGE:ISPlu1+TSD |
| 184 | matchSEG | 4402938-4449955/F | 47018  | 4221003-4268009/F | 47007  | 0.05 | 47008/23/1/10   | -              |
| 185 | indel    | 4449956-4450181/F | 226    | -                 | -      | -    | -               | specific       |
| 185 | matchSEG | 4450182-4489799/F | 39618  | 4268010-4307612/F | 39603  | 0.07 | 39604/25/1/14   | -              |
| 186 | indel    | -                 | -      | 4307613-4308608/F | 996    | -    | -               | MGE:ISPlu6+TSD |
| 186 | matchSEG | 4489800-4493024/F | 3225   | 4308609-4311833/F | 3225   | 1.36 | 3225/44/0/0     | DissimLocal    |
| 187 | indel    | 4493025-4493125/F | 101    | -                 | -      | -    | -               | MGE:MITEPlu5   |
| 187 | matchSEG | 4493126-4527061/F | 33936  | 4311834-4345782/F | 33949  | 0.12 | 33938/37/3/12   | -              |
| 188 | indel    | -                 | -      | 4345783-4347556/F | 1774   | -    | -               | MGE:ISPlu4+TSD |
| 188 | matchSEG | 4527062-4644133/F | 117072 | 4347557-4464578/F | 117022 | 0.14 | 117020/160/6/60 | -              |

|     |          |                   |       |                   |       |      |               |                 |
|-----|----------|-------------------|-------|-------------------|-------|------|---------------|-----------------|
| 189 | indel    | 4644134-4645232/F | 1099  | -                 | -     | -    | -             | MGE:ISPlu3+TSD  |
| 189 | matchSEG | 4645233-4650992/F | 5760  | 4464579-4470338/F | 5760  | 0.17 | 5760/10/0/0   | -               |
| 190 | indel    | -                 | -     | 4470339-4472685/F | 2347  | -    | -             | MGE:ISPlu20+TSD |
| 190 | matchSEG | 4650993-4707665/F | 56673 | 4472686-4529361/F | 56676 | 0.17 | 56674/94/4/5  | -               |
| 191 | indel    | 4707666-4709269/F | 1604  | -                 | -     | -    | -             | MGE:ISPlu14+TSD |
| 191 | matchSEG | 4709270-4767693/F | 58424 | 4529362-4587784/F | 58423 | 0.10 | 58424/60/1/0  | -               |
| 192 | indel    | 4767694-4769467/F | 1774  | -                 | -     | -    | -             | MGE:ISPlu4+TSD  |
| 192 | matchSEG | 4769468-4815443/F | 45976 | 4587785-4633710/F | 45926 | 0.06 | 45928/24/2/48 | -               |
| 193 | indel    | 4815444-4816440/F | 997   | -                 | -     | -    | -             | MGE:ISPlu6+TSD  |
| 193 | matchSEG | 4816441-4862212/F | 45772 | 4633711-4679510/F | 45800 | 0.01 | 45773/2/1/27  | -               |
| 194 | indel    | 4862213-4864559/F | 2347  | -                 | -     | -    | -             | MGE:ISPlu20+TSD |
| 194 | matchSEG | 4864560-4919862/F | 55303 | 4679511-4734812/F | 55302 | 0.04 | 55303/22/1/0  | -               |
| 195 | indel    | 4919863-4921363/F | 1501  | -                 | -     | -    | -             | MGE:ISPlu9+TSD  |



|     |          |                   |       |                   |       |      |                    |                                                          |
|-----|----------|-------------------|-------|-------------------|-------|------|--------------------|----------------------------------------------------------|
| 195 | matchSEG | 4921364-4938114/F | 16751 | 4734813-4751572/F | 16760 | 1.01 | 16752/168/1/8      | DissimLocal                                              |
| 196 | indel    | -                 | -     | 4751573-4760045/F | 8473  | -    | -                  | InternallyRepeated                                       |
| 196 | matchSEG | 4938115-4958917/F | 20803 | 4760046-4780848/F | 20803 | 0.42 | 20803/88/0/0       | -                                                        |
| 197 | indel    | -                 | -     | 4780849-4781934/F | 1086  | -    | -                  | MGE:ISPlu1+TSD                                           |
| 197 | matchSEG | 4958918-4960398/F | 1481  | 4781935-4783415/F | 1481  | 0.20 | 1481/3/0/0         | -                                                        |
| 198 | replace  | 4960399-4962789/F | 2391  | 4783416-4783532/F | 117   | -    | -                  | TT01m:InternallyRepeated+MGE:MITEPlu2 ; DJC:MGE:MITEPlu5 |
| 198 | matchSEG | 4962790-4996051/F | 33262 | 4783533-4816795/F | 33263 | 0.33 | 33253/107/2/2<br>1 | -                                                        |
| 199 | indel    | -                 | -     | 4816796-4816920/F | 125   | -    | -                  | MGE:MITEPlu5+TSD                                         |
| 199 | matchSEG | 4996052-5000336/F | 4285  | 4816921-4821205/F | 4285  | 0.09 | 4285/4/0/0         | -                                                        |
| 200 | indel    | 5000337-5001331/F | 995   | -                 | -     | -    | -                  | MGE:ISPlu11+TSD                                          |
| 200 | matchSEG | 5001332-5013171/F | 11840 | 4821206-4833044/F | 11839 | 0.58 | 11840/68/1/0       | -                                                        |
| 201 | indel    | 5013172-5013295/F | 124   | -                 | -     | -    | -                  | MGE:MITEPlu5                                             |
| 201 | matchSEG | 5013296-5038846/F | 25551 | 4833045-4858596/F | 25552 | 0.37 | 25552/94/1/0       | -                                                        |

|     |          |                   |       |                   |       |      |              |                                                                                |
|-----|----------|-------------------|-------|-------------------|-------|------|--------------|--------------------------------------------------------------------------------|
| 202 | indel    | 5038847-5039842/F | 996   | -                 | -     | -    | -            | MGE:ISPlu6+TSD                                                                 |
| 202 | matchSEG | 5039843-5043876/F | 4034  | 4858597-4862661/F | 4065  | 1.89 | 4031/73/3/40 | DissimLocal                                                                    |
| 203 | replace  | 5043877-5045202/F | 1326  | 4862662-4866066/F | 3405  | -    | -            | TT01m:specific+SeqRelated ;<br>DJC:specific+SeqRelated+MGE:ISPlu19+MGE:ISPlu7  |
| 203 | matchSEG | 5045203-5049836/F | 4634  | 4866067-4870700/F | 4634  | 0.41 | 4634/19/0/0  | -                                                                              |
| 204 | replace  | 5049837-5059155/F | 9319  | 4870701-4878173/F | 7473  | -    | -            | TT01m:specific+SeqRelated+MGE:MITEPlu5 ;<br>DJC:specific+SeqRelated+MGE:ISPlu2 |
| 204 | matchSEG | 5059156-5065926/F | 6771  | 4878174-4884945/F | 6772  | 0.09 | 6772/5/1/0   | -                                                                              |
| 205 | indel    | 5065927-5066922/F | 996   | -                 | -     | -    | -            | MGE:ISPlu6+TSD                                                                 |
| 205 | matchSEG | 5066923-5118865/F | 51943 | 4884946-4936898/F | 51953 | 0.03 | 51945/11/2/8 | -                                                                              |
| 206 | approxl  | 5118866-5118868/F | 3     | 4936899-4937026/F | 128   | -    | -            | TT01m:FewUnaligned ; DJC:MGE:MITEPlu5+FewAdjacent                              |
| 206 | matchSEG | 5118869-5130720/F | 11852 | 4937027-4948893/F | 11867 | 0.04 | 11853/4/1/14 | -                                                                              |
| 207 | indel    | -                 | -     | 4948894-4949018/F | 125   | -    | -            | specific                                                                       |
| 207 | matchSEG | 5130721-5140707/F | 9987  | 4949019-4959003/F | 9985  | 0.31 | 9986/30/1/1  | -                                                                              |

|     |          |                   |       |                   |       |      |                |                                                                                                                                     |
|-----|----------|-------------------|-------|-------------------|-------|------|----------------|-------------------------------------------------------------------------------------------------------------------------------------|
| 208 | replace  | 5140708-5140828/F | 121   | 4959004-4959014/F | 11    | -    | -              | TT01m:an atypical 121 bp insert in copies C and E of 23S rRNA ; DJC:contains the typical 11 bp region found in nearly all 23S rRNAs |
| 208 | matchSEG | 5140829-5153997/F | 13169 | 4959015-4972186/F | 13172 | 0.71 | 13172/90/4/1   | -                                                                                                                                   |
| 209 | indel    | -                 | -     | 4972187-4972311/F | 125   | -    | -              | MGE:MITEPlu5+TSD                                                                                                                    |
| 209 | matchSEG | 5153998-5247304/F | 93307 | 4972312-5065630/F | 93319 | 0.15 | 93297/134/2/34 | -                                                                                                                                   |
| 210 | indel    | -                 | -     | 5065631-5065751/F | 121   | -    | -              | MGE:IRS112+TSD                                                                                                                      |
| 210 | matchSEG | 5247305-5248110/F | 806   | 5065752-5066557/F | 806   | 0.37 | 806/3/0/0      | -                                                                                                                                   |
| 211 | indel    | 5248111-5249610/F | 1500  | -                 | -     | -    | -              | MGE:ISPlu9+TSD                                                                                                                      |
| 211 | matchSEG | 5249611-5270951/F | 21341 | 5066558-5087897/F | 21340 | 0.05 | 21341/10/1/0   | -                                                                                                                                   |
| 212 | replace  | 5270952-5271120/F | 169   | 5087898-5088540/F | 643   | -    | -              | TT01m:specific ; DJC:specific                                                                                                       |
| 212 | matchSEG | 5271121-5275254/F | 4134  | 5088541-5092674/F | 4134  | 0.12 | 4134/5/0/0     | -                                                                                                                                   |
| 213 | indel    | 5275255-5276177/F | 923   | -                 | -     | -    | -              | MGE:ISPlu7+TSD                                                                                                                      |
| 213 | matchSEG | 5276178-5322300/F | 46123 | 5092675-5138797/F | 46123 | 0.00 | 46123/2/0/0    | -                                                                                                                                   |
| 214 | indel    | 5322301-5323399/F | 1099  | -                 | -     | -    | -              | MGE:ISPlu9+TSD                                                                                                                      |

|     |          |                   |        |                   |        |      |                |                                                                                                             |
|-----|----------|-------------------|--------|-------------------|--------|------|----------------|-------------------------------------------------------------------------------------------------------------|
| 214 | matchSEG | 5323400-5333733/F | 10334  | 5138798-5149131/F | 10334  | 0.01 | 10334/1/0/0    | -                                                                                                           |
| 215 | matchSEG | 5333734-5334723/R | 990    | 5149132-5150121/F | 990    | 0.00 | 990/0/0/0      | inverted between TT01m and DJC                                                                              |
| 216 | matchSEG | 5334724-5334801/F | 78     | 5150122-5150199/F | 78     | 0.00 | 78/0/0/0       | -                                                                                                           |
| 217 | indel    | -                 | -      | 5150200-5152546/F | 2347   | -    | -              | MGE:ISPlu20+TSD                                                                                             |
| 217 | matchSEG | 5334802-5393324/F | 58523  | 5152547-5211078/F | 58532  | 0.24 | 58520/140/3/18 | -                                                                                                           |
| 218 | indel    | 5393325-5393507/F | 183    | -                 | -      | -    | -              | MGE:MITEPlu5+TSD                                                                                            |
| 218 | matchSEG | 5393508-5416451/F | 22944  | 5211079-5234049/F | 22971  | 0.22 | 22945/48/3/28  | -                                                                                                           |
| 219 | indel    | 5416452-5418225/F | 1774   | -                 | -      | -    | -              | MGE:ISPlu4+TSD                                                                                              |
| 219 | matchSEG | 5418226-5529800/F | 111575 | 5234050-5345614/F | 111565 | 0.07 | 111568/74/4/8  | -                                                                                                           |
| 220 | replace  | 5529801-5531603/F | 1803   | 5345615-5346906/F | 1292   | -    | -              | TT01m:TAAGCAA(20),TAAGTAA(46),MGE:ISPlu19,TAAGTAA(22);<br>DJC:TAAGCAA(7),TAAGTAA(14),MGE:ISPlu6,TAAGTAA(16) |
| 220 | matchSEG | 5531604-5559149/F | 27546  | 5346907-5374457/F | 27551  | 0.06 | 27548/14/3/4   | -                                                                                                           |
| 221 | indel    | -                 | -      | 5374458-5375114/F | 657    | -    | -              | InternallyRepeated                                                                                          |

|     |          |                   |       |                   |       |      |                |                                                               |
|-----|----------|-------------------|-------|-------------------|-------|------|----------------|---------------------------------------------------------------|
| 221 | matchSEG | 5559150-5559200/F | 51    | 5375115-5375165/F | 51    | 0.00 | 51/0/0/0       | -                                                             |
| 222 | indel    | -                 | -     | 5375166-5375320/F | 155   | -    | -              | InternallyRepeated                                            |
| 222 | matchSEG | 5559201-5565234/F | 6034  | 5375321-5381365/F | 6045  | 0.65 | 6036/37/2/9    | -                                                             |
| 223 | indel    | -                 | -     | 5381366-5416822/F | 35457 | -    | -              | specific (prophageR21)                                        |
| 223 | matchSEG | 5565235-5614692/F | 49458 | 5416823-5466192/F | 49370 | 0.36 | 49373/175/5/87 | -                                                             |
| 224 | indel    | 5614693-5615280/F | 588   | -                 | -     | -    | -              | MGE:ISPlu2                                                    |
| 224 | matchSEG | 5615281-5662045/F | 46765 | 5466193-5512937/F | 46745 | 0.43 | 46730/196/3/53 | -                                                             |
| 225 | replace  | 5662046-5667475/F | 5430  | 5512938-5516337/F | 3400  | -    | -              | TT01m:specific+SeqRelated+MGE:multi ; DJC:specific+SeqRelated |
| 225 | matchSEG | 5667476-5687677/F | 20202 | 5516338-5536539/F | 20202 | 0.52 | 20202/105/0/0  | -                                                             |

**Supplementary Table S3a: Mapping of gene codes between the TT01, TT01m and DJC genomes.** This table, which was generated in order to increase readability of this legend is a sample table of Supplementary table S3b.; Supplementary Table S3b, which is provided as separate file, reports the complete code mapping for protein-coding genes from the *P. luminescens* TT01 genome (*plu* codes) to the TT01m genome (PluTT01m) codes (5110 rows). For informative purposes, the codes from the TT01m genome are also mapped to those from the strain DJC genome. Placeholders (-; dash) indicate that a mapping gene is not annotated in the corresponding genome. It should be noted that missing gene calls, identified during this mapping project, have been post-predicted for the TT01m and DJC

genomes. For the TT01m genome, placeholders are only used when an ORF from the TT01 genome could not be mapped for the reason indicated (see below). Genes from the DJC genome without mapping to the TT01m genome are not listed. Supplementary Table S3a is sorted according to the information flow of this legend to support readability. Supplementary table S3b is sorted along the TT01m genome (indicated by increasing serial numbers) with intercalation of unmapped TT01 ORFs at their genome position. It should be noted that TT01m codes ending with 0 or 5 refer to genes originally annotated by the PGAP pipeline, all other TT01m genes have been post-predicted upon manual curation. The first 13 lines are regular genes with a 1:1:1 mapping between the TT01m, TT01 and DJC genomes. A placeholder in the comment field indicates that there is full annotation consistency between TT01m and TT01; accordingly, the protein sequences are identical. The following special cases were encountered: (a) a gene exists only in the TT01m and TT01 genome but not in the DJC genome; (b) a start codon assignment discrepancy may be encountered between the TT01m and TT01 genomes (comment term: StartDiscrep); (c) the inability to map a TT01m gene to a TT01 gene may be due to a missing gene call (comment term: missingGeneCall); (d) a disrupted gene, which has been called in the TT01m genome may not have been called in the TT01 genome (comment term: pseudoNotCalled); (e,f) automatic gene mapping depends on the positional correlation of the stop codon, which is ensured only for regular genes. Disrupted genes that do not extend up to the stop codon depend on manual mapping; (e) the gene may be disrupted but is stated to be a regular gene in the TT01 genome (comment term: isPseudo); (f) the gene may be regular but is invalidly annotated as disrupted in the TT01 genome (comment term: noPseudo); (g) some gene calls by the PGAP pipeline are ORFs which are considered not to code for a protein (spurious ORF). This is indicated only if the corresponding ORF has not been called for the TT01 genome (comment term: spurious); (h) a special case are "pseudocoding frames", which are gene calls traversing or covering the short (123 bp) mobile genetic element MITEPlu5, but with only short extensions into the regular genome (comment term: pseudoCoding); (i) if a pseudocoding frame has been called for both, the TT01m and TT01 genomes, the start codon assignment may be discrepant (comment term: StartDiscrep\_pseudocoding) (j,k,l) all gene calls in the TT01 genome which cannot be mapped to the TT01m genome have been evaluated and genes were post-predicted for the TT01m genome. Exceptions are (j) TT01 ORFs which are rated to be spurious (comment term: spurious); (k) short remnants of disrupted genes, typically with a homology region of less than 50 codons

(comment term: pseudoSkipped); (l) pseudocoding frames annotated only in the TT01 genome; (m) in some cases, a single TT01m gene maps to more than one TT01 gene, indicated by multiple TT01 codes (comment term: multiTT01). Typical cases are disrupted genes where the N-terminal partial coding region is called as one gene and a C-terminal partial coding region is called as an independent gene which an internal ATG codon mis-assigned to be a start codon. It should be noted that the underlying genome sequence is identical between the TT01m and TT01 genomes for the cases marked by this flag; (n) in some cases, a single TT01m gene is mapped to more than one DJC gene; in such cases, the DJC gene has been disrupted and has been targeted by a mobile genetic element; (o) similarly, if the TT01m gene has been targeted by a mobile genetic element, a single DJC gene maps to more than one TT01m gene. Because this table is based on TT01m genes, this situation is indicated by adding "(part)" after the DJC code; (p,q) gene disruption may generate chimeric genes; (p) these are listed only if discrepantly annotated in the TT01m and TT01 genomes (comment term: chimericPseudo); (q) this complication may be combined with mapping of a single TT01m gene to multiple TT01 genes (comment term: multiTT01+chimericPseudo); (r,s,t,u,v,w,x) while all the above refer to genes encoded on regions of sequence identity between the TT01m and TT01 genomes, the genome differences (see Supplementary Table S1) lead to gene differences; (r) some genes were not automatically mapped because they are encoded on an inverted genome region (comment term: onInversion); (s) genes encoded on an insertion in TT01m cannot be mapped (comment term: TT01m\_insertion); (t) likewise, genes encoded on an insertion in TT01 cannot be mapped (comment term: TT01\_insertion); (u) some genes carry a point mutation (comment term: e.g. *plu0049*(G177D)); (v) in case of a frameshift, a single TT01m gene may map to more than one TT01 gene, indicated by multiple TT01 codes (comment term: e.g. splitORFs(*plu1144+plu1145*)); (w) a frameshift may lead to an aberrant terminal sequence (comment term: e.g. aberrantN(*plu2762*)); (x) genes may be affected by more than one genome difference (comment term: e.g. severalDiffs(*plu1426*)); (y,z) the genome inversions between TT01m and TT01 may affect protein coding genes traversing the junction; (y) in one scenario, automatic mapping failed but manual mapping shows that the encoded proteins are identical, probably due to the sequence duplication outside the inversion (comment term: [seqid;traverseJunction]); (z) in one case, the inversion resulted in gene truncation (comment term: traversesInversionJunction+truncatedAtN(PluTT01m\_15460)); (Aa) an inserted sequence may affect a gene encoded across the

integration point (comment term: divergentN\_byTT01m\_insertion); (Ab) one disrupted gene could not be automatically mapped because a CTG codon had been mis-assigned to be a start codon (translated as Met) in the TT01 genome (comment term: *plu4790*(CTGcodon\_notStart)). This sample tables lists all of the exceptions and all combinations thereof. The complete Supplementary table S3b is provided in two formats: as a space-separated list (\*.txt) and in Excel format (\*.xlsx).

| TT01m code     | TT01 code      | DJC code     | comment         |
|----------------|----------------|--------------|-----------------|
| PluTT01m_00005 | <i>plu0001</i> | PluDJC_00005 | -               |
| PluTT01m_00010 | <i>plu0002</i> | PluDJC_00010 | -               |
| PluTT01m_00015 | <i>plu0003</i> | PluDJC_00015 | -               |
| PluTT01m_00020 | <i>plu0004</i> | PluDJC_00020 | -               |
| PluTT01m_00025 | <i>plu0005</i> | PluDJC_00025 | -               |
| PluTT01m_00035 | <i>plu0006</i> | PluDJC_00040 | -               |
| PluTT01m_00045 | <i>plu0008</i> | PluDJC_00050 | -               |
| PluTT01m_00050 | <i>plu0009</i> | PluDJC_00055 | -               |
| PluTT01m_00055 | <i>plu0010</i> | PluDJC_00060 | -               |
| PluTT01m_00060 | <i>plu0011</i> | PluDJC_00065 | -               |
| PluTT01m_00070 | <i>plu0013</i> | PluDJC_00075 | -               |
| PluTT01m_00075 | <i>plu0014</i> | PluDJC_00080 | -               |
| PluTT01m_00080 | <i>plu0015</i> | PluDJC_00085 | -               |
| PluTT01m_01630 | <i>plu0319</i> | -            | -               |
| PluTT01m_00040 | <i>plu0007</i> | PluDJC_00045 | StartDiscrep    |
| PluTT01m_01740 | <i>plu0340</i> | -            | StartDiscrep    |
| PluTT01m_00100 | -              | PluDJC_00105 | missingGeneCall |
| PluTT01m_00030 | -              | -            | missingGeneCall |
| PluTT01m_00027 | -              | PluDJC_00027 | pseudoNotCalled |
| PluTT01m_03705 | -              | -            | pseudoNotCalled |
| PluTT01m_00665 | <i>plu0128</i> | PluDJC_00720 | isPseudo        |



|                |                                |                           |                           |
|----------------|--------------------------------|---------------------------|---------------------------|
| PluTT01m_01725 | <i>plu0337</i>                 | -                         | isPseudo                  |
| PluTT01m_00310 | <i>plu0062</i>                 | PluDJC_00315              | noPseudo                  |
| PluTT01m_01390 | -                              | PluDJC_01440              | spurious                  |
| PluTT01m_01425 | -                              | -                         | spurious                  |
| PluTT01m_00835 | -                              | PluDJC_00890              | pseudoCoding              |
| PluTT01m_11435 | -                              | -                         | pseudoCoding              |
| PluTT01m_06915 | <i>plu1346</i>                 | PluDJC_06495              | StartDiscrep_pseudocoding |
| -              | <i>plu0016</i>                 | -                         | spurious                  |
| -              | <i>plu0083</i>                 | -                         | pseudoSkipped             |
| -              | <i>plu0725</i>                 | -                         | pseudoCoding              |
| PluTT01m_00355 | <i>plu0066+plu0067</i>         | PluDJC_00360              | multiTT01                 |
| PluTT01m_05515 | <i>plu1076+plu1077</i>         | -                         | multiTT01                 |
| PluTT01m_00785 | <i>plu0153</i>                 | PluDJC_00840+PluDJC_00845 | -                         |
| PluTT01m_00600 | <i>plu0116</i>                 | PluDJC_00650+PluDJC_00655 | StartDiscrep              |
| PluTT01m_02765 | -                              | PluDJC_02672+PluDJC_02677 | missingGeneCall           |
| PluTT01m_12025 | <i>plu2334</i>                 | PluDJC_12365+PluDJC_12370 | noPseudo                  |
| PluTT01m_15170 | <i>plu2953</i>                 | PluDJC_15080(part)        | StartDiscrep              |
| PluTT01m_04385 | <i>plu0853</i>                 | PluDJC_04355(part)        | isPseudo                  |
| PluTT01m_16775 | -                              | PluDJC_16650(part)        | pseudoNotCalled           |
| PluTT01m_05615 | <i>plu1101</i>                 | -                         | chimericPseudo            |
| PluTT01m_05620 | <i>plu1102+plu1101(N-term)</i> | -                         | multiTT01+chimericPseudo  |
| PluTT01m_00165 | <i>plu0032</i>                 | PluDJC_00165              | onInversion               |
| PluTT01m_15470 | <i>plu3011</i>                 | -                         | onInversion               |
| PluTT01m_00155 | <i>plu0034</i>                 | PluDJC_00175              | onInversion+StartDiscrep  |
| PluTT01m_15465 | <i>plu3012</i>                 | -                         | onInversion+StartDiscrep  |
| PluTT01m_18435 | -                              | -                         | TT01m_insertion           |
| -              | <i>plu3696</i>                 | -                         | TT01_insertion            |
| PluTT01m_00245 | <i>plu0049</i>                 | PluDJC_00250              | <i>plu0049(G177D)</i>     |
| PluTT01m_01370 | <i>plu0267</i>                 | PluDJC_01420              | <i>plu0267(N134K)</i>     |

|                |                        |              |                                                         |
|----------------|------------------------|--------------|---------------------------------------------------------|
| PluTT01m_02545 | <i>plu0497</i>         | PluDJC_02460 | <i>plu0497</i> (K118E)                                  |
| PluTT01m_07300 | <i>plu1414</i>         | PluDJC_06915 | StartDiscrep+ <i>plu1414</i> (S191C)                    |
| PluTT01m_12570 | <i>plu2443</i>         | PluDJC_12895 | <i>plu2443</i> (W139S)                                  |
| PluTT01m_21290 | <i>plu4163</i>         | -            | <i>plu4163</i> (H253Q)                                  |
| PluTT01m_05840 | <i>plu1144+plu1145</i> | -            | splitORFs( <i>plu1144+plu1145</i> )                     |
| PluTT01m_11330 | <i>plu2195+plu2196</i> | -            | splitORFs( <i>plu2195+plu2196</i> )                     |
| PluTT01m_14175 | <i>plu2762</i>         | PluDJC_14485 | aberrantN( <i>plu2762</i> )                             |
| PluTT01m_23445 | <i>plu4585</i>         | PluDJC_22725 | aberrantC( <i>plu4585</i> )                             |
| PluTT01m_07370 | <i>plu1426</i>         | PluDJC_06985 | severalDiffs( <i>plu1426</i> )                          |
| PluTT01m_23020 | <i>plu4505</i>         | PluDJC_22300 | severalDiffs( <i>plu4505</i> )                          |
| PluTT01m_18475 | <i>plu3594</i>         | PluDJC_17655 | [seqid;traverseJunction]                                |
| PluTT01m_15460 | <i>plu3013</i>         | -            | traversesInversionJunction+truncatedAtN(PluTT01m_15460) |
| PluTT01m_18430 | <i>plu3593</i>         | -            | divergentN_byTT01m_insertion                            |
| PluTT01m_24585 | <i>plu4790</i>         | PluDJC_23855 | <i>plu4790</i> (CTGcodon_notStart)                      |

**Supplementary Table S4: Strain-specific protein-coding genes.** In the 1<sup>st</sup> part, genes specific for *P. luminescens* strain DJC are listed, in the 2<sup>nd</sup> part those for strain TT01m. Proteins are sorted by protein name, except that those annotated as "hypothetical protein" have been moved to the end of the list. If assigned, gene names are given in parenthesis, preceding the protein name. For convenience, the codes of the corresponding ORFs and therefore the respective proteins in the published TT01 genome (Plu numbers) are provided for TT01m-specific protein-coding genes/proteins. No such mapping is possible for DJC-specific protein-coding genes (indicated by a dash).

| <b>strain-specific proteins in <i>P. luminescens</i> DJC</b> |                        |                                                       |
|--------------------------------------------------------------|------------------------|-------------------------------------------------------|
| <b>code</b>                                                  | <b>TT01 equivalent</b> | <b>protein name/specificity</b>                       |
| PluDJC_08165                                                 | -                      | DDE endonuclease                                      |
| PluDJC_09225                                                 | -                      | DDE endonuclease                                      |
| PluDJC_10625                                                 | -                      | DNA adenine methylase                                 |
| PluDJC_24075                                                 | -                      | DNA adenine methylase                                 |
| PluDJC_08030                                                 | -                      | DNA circulation protein                               |
| PluDJC_09385                                                 | -                      | DNA circulation protein                               |
| PluDJC_10620                                                 | -                      | DNA cytosine methyltransferase                        |
| PluDJC_07945                                                 | -                      | DNA primase                                           |
| PluDJC_08160                                                 | -                      | DNA transposition protein                             |
| PluDJC_09230                                                 | -                      | DNA transposition protein                             |
| PluDJC_08170                                                 | -                      | DNA-binding protein                                   |
| PluDJC_09220                                                 | -                      | DNA-binding protein                                   |
| PluDJC_10590                                                 | -                      | DNA-binding protein                                   |
| PluDJC_09430                                                 | -                      | DNA-invertase                                         |
| PluDJC_21410                                                 | -                      | DUF1837 domain-containing protein                     |
| PluDJC_08055                                                 | -                      | DUF2635 domain-containing protein                     |
| PluDJC_09360                                                 | -                      | DUF2635 domain-containing protein                     |
| PluDJC_08085                                                 | -                      | DUF2730 domain-containing protein                     |
| PluDJC_09300                                                 | -                      | DUF2730 domain-containing protein                     |
| PluDJC_24085                                                 | -                      | DUF2732 domain-containing protein                     |
| PluDJC_08145                                                 | -                      | DUF3164 domain-containing protein                     |
| PluDJC_09245                                                 | -                      | DUF3164 domain-containing protein                     |
| PluDJC_08220                                                 | -                      | HNH endonuclease                                      |
| PluDJC_07955                                                 | -                      | XRE family transcriptional regulator                  |
| PluDJC_10580                                                 | -                      | XRE family transcriptional regulator                  |
| PluDJC_24105                                                 | -                      | XRE family transcriptional regulator                  |
| PluDJC_03685                                                 | -                      | (higA) addiction module antidote protein, HigA family |
| PluDJC_07950                                                 | -                      | antitermination protein                               |
| PluDJC_06610                                                 | -                      | colicin immunity protein                              |
| PluDJC_11810                                                 | -                      | growth inhibitor PemK                                 |
| PluDJC_07940                                                 | -                      | helicase                                              |
| PluDJC_21420                                                 | -                      | helicase                                              |

|              |   |                                                          |
|--------------|---|----------------------------------------------------------|
| PluDJC_10565 | - | integrase                                                |
| PluDJC_23915 | - | late control protein D                                   |
| PluDJC_11755 | - | methionine repressor-like protein                        |
| PluDJC_10670 | - | oxidoreductase                                           |
| PluDJC_24035 | - | oxidoreductase                                           |
| PluDJC_08110 | - | peptidoglycan-binding protein                            |
| PluDJC_09280 | - | peptidoglycan-binding protein                            |
| PluDJC_10635 | - | replication endonuclease                                 |
| PluDJC_21380 | - | restriction endonuclease subunit S                       |
| PluDJC_07925 | - | transcriptional regulator                                |
| PluDJC_08115 | - | transcriptional regulator                                |
| PluDJC_09275 | - | transcriptional regulator                                |
| PluDJC_15135 | - | transcriptional regulator                                |
| PluDJC_23910 | - | transcriptional regulator                                |
| PluDJC_11985 | - | type II toxin-antitoxin system Phd/YefM family antitoxin |
| PluDJC_11990 | - | type II toxin-antitoxin system RelE/ParE family toxin    |
| PluDJC_10660 | - | type II toxin-antitoxin system YafO family toxin         |
| PluDJC_11485 | - | type VI secretion system tube protein Hcp                |
| PluDJC_08090 | - | zinc finger domain protein                               |
| PluDJC_00035 | - | hypothetical protein                                     |
| PluDJC_00550 | - | hypothetical protein                                     |
| PluDJC_00555 | - | hypothetical protein                                     |
| PluDJC_00560 | - | hypothetical protein                                     |
| PluDJC_00570 | - | hypothetical protein                                     |
| PluDJC_00580 | - | hypothetical protein                                     |
| PluDJC_00585 | - | hypothetical protein                                     |
| PluDJC_02660 | - | hypothetical protein                                     |
| PluDJC_03695 | - | hypothetical protein                                     |
| PluDJC_05100 | - | hypothetical protein                                     |
| PluDJC_07325 | - | hypothetical protein                                     |
| PluDJC_07920 | - | hypothetical protein                                     |
| PluDJC_07935 | - | hypothetical protein                                     |
| PluDJC_07960 | - | hypothetical protein                                     |
| PluDJC_07965 | - | hypothetical protein                                     |
| PluDJC_07970 | - | hypothetical protein                                     |
| PluDJC_07975 | - | hypothetical protein                                     |
| PluDJC_08000 | - | hypothetical protein                                     |
| PluDJC_08005 | - | hypothetical protein                                     |
| PluDJC_08010 | - | hypothetical protein                                     |
| PluDJC_08015 | - | hypothetical protein                                     |
| PluDJC_08035 | - | hypothetical protein                                     |
| PluDJC_08040 | - | hypothetical protein                                     |
| PluDJC_08065 | - | hypothetical protein                                     |
| PluDJC_08070 | - | hypothetical protein                                     |
| PluDJC_08095 | - | hypothetical protein                                     |
| PluDJC_08100 | - | hypothetical protein                                     |

|              |   |                      |
|--------------|---|----------------------|
| PluDJC_08105 | - | hypothetical protein |
| PluDJC_08120 | - | hypothetical protein |
| PluDJC_08125 | - | hypothetical protein |
| PluDJC_08130 | - | hypothetical protein |
| PluDJC_08135 | - | hypothetical protein |
| PluDJC_08140 | - | hypothetical protein |
| PluDJC_08150 | - | hypothetical protein |
| PluDJC_08155 | - | hypothetical protein |
| PluDJC_08175 | - | hypothetical protein |
| PluDJC_08200 | - | hypothetical protein |
| PluDJC_08205 | - | hypothetical protein |
| PluDJC_08210 | - | hypothetical protein |
| PluDJC_08215 | - | hypothetical protein |
| PluDJC_08225 | - | hypothetical protein |
| PluDJC_08265 | - | hypothetical protein |
| PluDJC_08270 | - | hypothetical protein |
| PluDJC_08285 | - | hypothetical protein |
| PluDJC_08310 | - | hypothetical protein |
| PluDJC_08330 | - | hypothetical protein |
| PluDJC_09215 | - | hypothetical protein |
| PluDJC_09235 | - | hypothetical protein |
| PluDJC_09240 | - | hypothetical protein |
| PluDJC_09250 | - | hypothetical protein |
| PluDJC_09255 | - | hypothetical protein |
| PluDJC_09260 | - | hypothetical protein |
| PluDJC_09265 | - | hypothetical protein |
| PluDJC_09270 | - | hypothetical protein |
| PluDJC_09285 | - | hypothetical protein |
| PluDJC_09295 | - | hypothetical protein |
| PluDJC_09310 | - | hypothetical protein |
| PluDJC_09315 | - | hypothetical protein |
| PluDJC_09320 | - | hypothetical protein |
| PluDJC_09345 | - | hypothetical protein |
| PluDJC_09350 | - | hypothetical protein |
| PluDJC_09355 | - | hypothetical protein |
| PluDJC_09375 | - | hypothetical protein |
| PluDJC_09380 | - | hypothetical protein |
| PluDJC_09400 | - | hypothetical protein |
| PluDJC_09405 | - | hypothetical protein |
| PluDJC_09410 | - | hypothetical protein |
| PluDJC_09415 | - | hypothetical protein |
| PluDJC_10570 | - | hypothetical protein |
| PluDJC_10575 | - | hypothetical protein |
| PluDJC_10585 | - | hypothetical protein |
| PluDJC_10595 | - | hypothetical protein |
| PluDJC_10600 | - | hypothetical protein |
| PluDJC_10605 | - | hypothetical protein |

|                                                                |                        |                                                              |
|----------------------------------------------------------------|------------------------|--------------------------------------------------------------|
| PluDJC_10610                                                   | -                      | hypothetical protein                                         |
| PluDJC_10615                                                   | -                      | hypothetical protein                                         |
| PluDJC_10630                                                   | -                      | hypothetical protein                                         |
| PluDJC_10640                                                   | -                      | hypothetical protein                                         |
| PluDJC_10645                                                   | -                      | hypothetical protein                                         |
| PluDJC_10650                                                   | -                      | hypothetical protein                                         |
| PluDJC_10655                                                   | -                      | hypothetical protein                                         |
| PluDJC_10755                                                   | -                      | hypothetical protein                                         |
| PluDJC_10790                                                   | -                      | hypothetical protein                                         |
| PluDJC_10795                                                   | -                      | hypothetical protein                                         |
| PluDJC_10800                                                   | -                      | hypothetical protein                                         |
| PluDJC_11765                                                   | -                      | hypothetical protein                                         |
| PluDJC_11820                                                   | -                      | hypothetical protein                                         |
| PluDJC_11980                                                   | -                      | hypothetical protein                                         |
| PluDJC_11995                                                   | -                      | hypothetical protein                                         |
| PluDJC_15130                                                   | -                      | hypothetical protein                                         |
| PluDJC_15370                                                   | -                      | hypothetical protein                                         |
| PluDJC_16590                                                   | -                      | hypothetical protein                                         |
| PluDJC_20855                                                   | -                      | hypothetical protein                                         |
| PluDJC_23875                                                   | -                      | hypothetical protein                                         |
| PluDJC_23880                                                   | -                      | hypothetical protein                                         |
| PluDJC_23885                                                   | -                      | hypothetical protein                                         |
| PluDJC_23995                                                   | -                      | hypothetical protein                                         |
| PluDJC_24045                                                   | -                      | hypothetical protein                                         |
| PluDJC_24055                                                   | -                      | hypothetical protein                                         |
| PluDJC_24060                                                   | -                      | hypothetical protein                                         |
| PluDJC_24080                                                   | -                      | hypothetical protein                                         |
| PluDJC_24090                                                   | -                      | hypothetical protein                                         |
| PluDJC_24095                                                   | -                      | hypothetical protein                                         |
| PluDJC_24100                                                   | -                      | hypothetical protein                                         |
| <b>strain-specific proteins in <i>P. luminescens</i> TT01m</b> |                        |                                                              |
| <b>code</b>                                                    | <b>TT01 equivalent</b> | <b>protein name/specificity</b>                              |
| PluTT01m_09610                                                 | Plu1869                | 3-isopropylmalate dehydratase large subunit                  |
| PluTT01m_12700                                                 | Plu2470                | ABC transporter permease                                     |
| PluTT01m_14980                                                 | Plu2917                | ATP-dependent helicase                                       |
| PluTT01m_09630                                                 | Plu1873                | ATP-grasp domain-containing protein                          |
| PluTT01m_09635                                                 | Plu1874                | ATP-grasp domain-containing protein                          |
| PluTT01m_11335                                                 | Plu2197                | ATP-grasp domain-containing protein                          |
| PluTT01m_04775                                                 | Plu0928                | AbrB/MazE/SpoVT family DNA-binding domain-containing protein |
| PluTT01m_14805                                                 | Plu2885                | Arc family DNA-binding protein                               |
| PluTT01m_01730                                                 | Plu0338                | DNA cytosine methyltransferase                               |
| PluTT01m_15115                                                 | Plu2942                | DNA methyltransferase                                        |
| PluTT01m_14975                                                 | Plu2916                | DNA primase                                                  |
| PluTT01m_17850                                                 | Plu3472                | DNA replication protein DnaC                                 |
| PluTT01m_17805                                                 | Plu3461                | DNA-binding protein                                          |
| PluTT01m_05510                                                 | Plu1075                | DUF1016 domain-containing protein                            |

|                |         |                                                                   |
|----------------|---------|-------------------------------------------------------------------|
| PluTT01m_15080 | Plu2937 | DUF1317 domain-containing protein                                 |
| PluTT01m_17675 | Plu3435 | DUF1320 domain-containing protein                                 |
| PluTT01m_17830 | Plu3468 | DUF1367 domain-containing protein                                 |
| PluTT01m_01800 | Plu0354 | DUF1795 domain-containing protein                                 |
| PluTT01m_14855 | Plu2896 | DUF2184 domain-containing protein                                 |
| PluTT01m_17495 | Plu3401 | DUF2184 domain-containing protein                                 |
| PluTT01m_17680 | Plu3436 | DUF2190 domain-containing protein                                 |
| PluTT01m_14865 | Plu2898 | DUF2213 domain-containing protein                                 |
| PluTT01m_17505 | Plu3403 | DUF2213 domain-containing protein                                 |
| PluTT01m_02730 | Plu0535 | DUF2247 domain-containing protein                                 |
| PluTT01m_07715 | Plu1482 | DUF2384 domain-containing protein                                 |
| PluTT01m_14950 | Plu2912 | DUF2591 domain-containing protein                                 |
| PluTT01m_14760 | Plu2875 | DUF2612 domain-containing protein                                 |
| PluTT01m_17405 | Plu3383 | DUF2612 domain-containing protein                                 |
| PluTT01m_17780 | Plu3456 | DUF3102 domain-containing protein                                 |
| PluTT01m_14825 | plu2890 | DUF3277 domain-containing protein                                 |
| PluTT01m_14830 | Plu2891 | DUF3383 domain-containing protein                                 |
| PluTT01m_17465 | Plu3395 | DUF3383 domain-containing protein                                 |
| PluTT01m_17715 | Plu3443 | DUF3486 domain-containing protein                                 |
| PluTT01m_22110 | Plu4326 | DUF3732 domain-containing protein                                 |
| PluTT01m_14850 | Plu2895 | DUF4054 domain-containing protein                                 |
| PluTT01m_17485 | Plu3399 | DUF4054 domain-containing protein                                 |
| PluTT01m_04435 | Plu0863 | DUF4065 domain-containing protein                                 |
| PluTT01m_16715 | Plu3245 | DUF4123 domain-containing protein                                 |
| PluTT01m_09460 | Plu1836 | DUF4297 domain-containing protein                                 |
| PluTT01m_17540 | Plu3411 | DUF4868 domain-containing protein                                 |
| PluTT01m_17705 | Plu3441 | DUF935 domain-containing protein                                  |
| PluTT01m_12725 | Plu2474 | GTP cyclohydrolase II RibA                                        |
| PluTT01m_17775 | Plu3455 | IcIR family transcriptional regulator                             |
| PluTT01m_09600 | Plu1886 | LLM class flavin-dependent oxidoreductase                         |
| PluTT01m_07880 | Plu1514 | MFS transporter                                                   |
| PluTT01m_09640 | Plu1875 | MFS transporter                                                   |
| PluTT01m_07885 | Plu1515 | MccB protein                                                      |
| PluTT01m_09625 | Plu1872 | N-acetyltransferase                                               |
| PluTT01m_13600 | Plu2650 | N-acetyltransferase                                               |
| PluTT01m_04780 | Plu0929 | PIN domain-containing protein                                     |
| PluTT01m_05630 | Plu1105 | PLP-dependent aminotransferase family protein                     |
| PluTT01m_01750 | Plu0342 | SMI1/KNR4 family protein                                          |
| PluTT01m_01775 | Plu0348 | SMI1/KNR4 family protein                                          |
| PluTT01m_05530 | Plu1080 | TIGR03745 family integrating conjugative element membrane protein |
| PluTT01m_05540 | none    | TIGR03746 family integrating conjugative element protein          |
| PluTT01m_05505 | Plu1074 | TIGR03747 family integrating conjugative element membrane protein |
| PluTT01m_05545 | Plu1082 | TIGR03749 family integrating conjugative element protein          |
| PluTT01m_05535 | Plu1081 | TIGR03750 family conjugal transfer protein                        |

|                |         |                                                          |
|----------------|---------|----------------------------------------------------------|
| PluTT01m_05555 | Plu1084 | TIGR03751 family conjugal transfer lipoprotein           |
| PluTT01m_05550 | Plu1083 | TIGR03752 family integrating conjugative element protein |
| PluTT01m_05570 | Plu1087 | TIGR03756 family integrating conjugative element protein |
| PluTT01m_05565 | Plu1086 | TIGR03757 family integrating conjugative element protein |
| PluTT01m_05525 | Plu1079 | TIGR03758 family integrating conjugative element protein |
| PluTT01m_12730 | Plu2475 | WD40 repeat domain-containing protein                    |
| PluTT01m_05600 | Plu1095 | XRE family transcriptional regulator                     |
| PluTT01m_15000 | Plu2921 | XRE family transcriptional regulator                     |
| PluTT01m_15005 | Plu2922 | XRE family transcriptional regulator                     |
| PluTT01m_17385 | Plu3379 | XRE family transcriptional regulator                     |
| PluTT01m_17575 | Plu3418 | XRE family transcriptional regulator                     |
| PluTT01m_17580 | Plu3419 | XRE family transcriptional regulator                     |
| PluTT01m_17765 | Plu3453 | XRE family transcriptional regulator                     |
| PluTT01m_11690 | Plu2266 | alpha/beta hydrolase                                     |
| PluTT01m_11350 | Plu2200 | amidase                                                  |
| PluTT01m_14940 | Plu2911 | antitermination protein                                  |
| PluTT01m_11425 | Plu2215 | class I SAM-dependent methyltransferase                  |
| PluTT01m_09445 | Plu1831 | conjugal transfer TraD family protein                    |
| PluTT01m_05585 | Plu1090 | conjugal transfer protein TraG                           |
| PluTT01m_05560 | Plu1085 | conjugal transfer ATPase                                 |
| PluTT01m_17905 | Plu3486 | excisionase                                              |
| PluTT01m_15075 | Plu2936 | exonuclease                                              |
| PluTT01m_15480 | Plu3010 | glycosyltransferase family 1 protein                     |
| PluTT01m_05625 | Plu1104 | glyoxalase                                               |
| PluTT01m_05660 | Plu1111 | (ItrA) group II intron reverse transcriptase/maturase    |
| PluTT01m_17855 | Plu3473 | helix-turn-helix domain-containing protein               |
| PluTT01m_17785 | Plu3457 | integrase                                                |
| PluTT01m_05575 | Plu1088 | integrating conjugative element protein                  |
| PluTT01m_05520 | Plu1078 | integrative conjugative element protein, RAQPRD family   |
| PluTT01m_17555 | Plu3414 | lysozyme                                                 |
| PluTT01m_17735 | Plu3447 | lytic transglycosylase domain-containing protein         |
| PluTT01m_05635 | Plu1106 | mandelate dehydrogenase                                  |
| PluTT01m_17425 | Plu3388 | oxidoreductase                                           |
| PluTT01m_14800 | Plu2883 | phage repressor protein                                  |
| PluTT01m_17760 | Plu3452 | prepilin peptidase                                       |
| PluTT01m_15145 | Plu2947 | recombinase                                              |
| PluTT01m_15070 | Plu2935 | recombinase RecT                                         |
| PluTT01m_17845 | Plu3471 | replicative DNA helicase                                 |
| PluTT01m_14970 | none    | restriction alleviation protein, Lar family              |
| PluTT01m_17745 | Plu3449 | restriction endonuclease subunit M                       |
| PluTT01m_12735 | Plu2476 | serine/threonine protein kinase                          |
| PluTT01m_17865 | Plu3475 | tRNA-(guanine-N1)-methyltransferase                      |
| PluTT01m_17450 | none    | transcription elongation factor GreA                     |
| PluTT01m_14985 | Plu2918 | transcriptional regulator                                |



|                |                 |                                                 |
|----------------|-----------------|-------------------------------------------------|
| PluTT01m_15030 | Plu2928         | transcriptional regulator                       |
| PluTT01m_17770 | Plu3454         | transcriptional regulator                       |
| PluTT01m_19140 | Plu3733         | transcriptional regulator                       |
| PluTT01m_17390 | Plu3380         | type I toxin-antitoxin system SymE family toxin |
| PluTT01m_01805 | Plu0355         | type VI secretion system tip protein VgrG       |
| PluTT01m_01735 | Plu0339         | very short patch repair endonuclease            |
| PluTT01m_00030 | none            | hypothetical protein                            |
| PluTT01m_01740 | Plu0340         | hypothetical protein                            |
| PluTT01m_01745 | Plu0341         | hypothetical protein                            |
| PluTT01m_01770 | Plu0347         | hypothetical protein                            |
| PluTT01m_01785 | Plu0351         | hypothetical protein                            |
| PluTT01m_01790 | Plu0352         | hypothetical protein                            |
| PluTT01m_02740 | Plu0538         | hypothetical protein                            |
| PluTT01m_02750 | Plu0540         | hypothetical protein                            |
| PluTT01m_02755 | Plu0541         | hypothetical protein                            |
| PluTT01m_05120 | Plu0994         | hypothetical protein                            |
| PluTT01m_05580 | Plu1089         | hypothetical protein                            |
| PluTT01m_05590 | Plu1091         | hypothetical protein                            |
| PluTT01m_05595 | Plu1092         | hypothetical protein                            |
| PluTT01m_05597 | Plu1093         | hypothetical protein                            |
| PluTT01m_05610 | Plu1097         | hypothetical protein                            |
| PluTT01m_05645 | Plu1108+Plu1109 | hypothetical protein                            |
| PluTT01m_05655 | none            | hypothetical protein                            |
| PluTT01m_05715 | Plu1122         | hypothetical protein                            |
| PluTT01m_05720 | Plu1123         | hypothetical protein                            |
| PluTT01m_07720 | Plu1483         | hypothetical protein                            |
| PluTT01m_09440 | Plu1830         | hypothetical protein                            |
| PluTT01m_09450 | Plu1833         | hypothetical protein                            |
| PluTT01m_09455 | Plu1834         | hypothetical protein                            |
| PluTT01m_09615 | Plu1870         | hypothetical protein                            |
| PluTT01m_09645 | Plu1876         | hypothetical protein                            |
| PluTT01m_11315 | Plu2192         | hypothetical protein                            |
| PluTT01m_11330 | Plu2195+plu2196 | hypothetical protein                            |
| PluTT01m_11420 | Plu2214         | hypothetical protein                            |
| PluTT01m_11430 | Plu2216         | hypothetical protein                            |
| PluTT01m_11635 | Plu2256         | hypothetical protein                            |
| PluTT01m_11640 | Plu2257         | hypothetical protein                            |
| PluTT01m_12205 | Plu2373         | hypothetical protein                            |
| PluTT01m_12690 | Plu2468         | hypothetical protein                            |
| PluTT01m_14765 | Plu2876         | hypothetical protein                            |
| PluTT01m_14770 | Plu2877         | hypothetical protein                            |
| PluTT01m_14780 | Plu2879         | hypothetical protein                            |
| PluTT01m_14785 | Plu2880         | hypothetical protein                            |
| PluTT01m_14790 | Plu2881         | hypothetical protein                            |
| PluTT01m_14802 | Plu2884         | hypothetical protein                            |
| PluTT01m_14810 | Plu2886         | hypothetical protein                            |
| PluTT01m_14815 | Plu2887         | hypothetical protein                            |

|                |         |                      |
|----------------|---------|----------------------|
| PluTT01m_14820 | Plu2889 | hypothetical protein |
| PluTT01m_14835 | Plu2892 | hypothetical protein |
| PluTT01m_14840 | Plu2893 | hypothetical protein |
| PluTT01m_14845 | Plu2894 | hypothetical protein |
| PluTT01m_14860 | Plu2897 | hypothetical protein |
| PluTT01m_14870 | Plu2899 | hypothetical protein |
| PluTT01m_14875 | Plu2900 | hypothetical protein |
| PluTT01m_14885 | Plu2902 | hypothetical protein |
| PluTT01m_14890 | Plu2903 | hypothetical protein |
| PluTT01m_14895 | none    | hypothetical protein |
| PluTT01m_14900 | Plu2904 | hypothetical protein |
| PluTT01m_14925 | Plu2909 | hypothetical protein |
| PluTT01m_14930 | none    | hypothetical protein |
| PluTT01m_14935 | Plu2910 | hypothetical protein |
| PluTT01m_14945 | none    | hypothetical protein |
| PluTT01m_14955 | Plu2913 | hypothetical protein |
| PluTT01m_14960 | Plu2914 | hypothetical protein |
| PluTT01m_14965 | none    | hypothetical protein |
| PluTT01m_14995 | Plu2920 | hypothetical protein |
| PluTT01m_15010 | Plu2923 | hypothetical protein |
| PluTT01m_15015 | Plu2924 | hypothetical protein |
| PluTT01m_15020 | Plu2926 | hypothetical protein |
| PluTT01m_15025 | Plu2927 | hypothetical protein |
| PluTT01m_15035 | Plu2929 | hypothetical protein |
| PluTT01m_15040 | Plu2930 | hypothetical protein |
| PluTT01m_15045 | Plu2931 | hypothetical protein |
| PluTT01m_15050 | Plu2932 | hypothetical protein |
| PluTT01m_15055 | Plu2933 | hypothetical protein |
| PluTT01m_15060 | none    | hypothetical protein |
| PluTT01m_15065 | Plu2934 | hypothetical protein |
| PluTT01m_15085 | Plu2938 | hypothetical protein |
| PluTT01m_15090 | Plu2939 | hypothetical protein |
| PluTT01m_15095 | Plu2940 | hypothetical protein |
| PluTT01m_15100 | none    | hypothetical protein |
| PluTT01m_15105 | Plu2941 | hypothetical protein |
| PluTT01m_15110 | none    | hypothetical protein |
| PluTT01m_15120 | Plu2943 | hypothetical protein |
| PluTT01m_15125 | Plu2944 | hypothetical protein |
| PluTT01m_15130 | none    | hypothetical protein |
| PluTT01m_15135 | Plu2945 | hypothetical protein |
| PluTT01m_15140 | Plu2946 | hypothetical protein |
| PluTT01m_15470 | Plu3011 | hypothetical protein |
| PluTT01m_15490 | Plu3008 | hypothetical protein |
| PluTT01m_17400 | Plu3382 | hypothetical protein |
| PluTT01m_17410 | Plu3384 | hypothetical protein |
| PluTT01m_17415 | Plu3385 | hypothetical protein |
| PluTT01m_17417 | Plu3386 | hypothetical protein |

|                |         |                      |
|----------------|---------|----------------------|
| PluTT01m_17420 | Plu3387 | hypothetical protein |
| PluTT01m_17430 | Plu3389 | hypothetical protein |
| PluTT01m_17435 | Plu3390 | hypothetical protein |
| PluTT01m_17440 | Plu3391 | hypothetical protein |
| PluTT01m_17445 | Plu3392 | hypothetical protein |
| PluTT01m_17455 | Plu3393 | hypothetical protein |
| PluTT01m_17460 | Plu3394 | hypothetical protein |
| PluTT01m_17470 | Plu3396 | hypothetical protein |
| PluTT01m_17475 | Plu3397 | hypothetical protein |
| PluTT01m_17480 | Plu3398 | hypothetical protein |
| PluTT01m_17490 | Plu3400 | hypothetical protein |
| PluTT01m_17500 | Plu3402 | hypothetical protein |
| PluTT01m_17515 | Plu3405 | hypothetical protein |
| PluTT01m_17525 | Plu3407 | hypothetical protein |
| PluTT01m_17530 | Plu3408 | hypothetical protein |
| PluTT01m_17545 | Plu3412 | hypothetical protein |
| PluTT01m_17565 | Plu3416 | hypothetical protein |
| PluTT01m_17625 | none    | hypothetical protein |
| PluTT01m_17630 | Plu3428 | hypothetical protein |
| PluTT01m_17650 | none    | hypothetical protein |
| PluTT01m_17665 | Plu3433 | hypothetical protein |
| PluTT01m_17670 | Plu3434 | hypothetical protein |
| PluTT01m_17685 | Plu3437 | hypothetical protein |
| PluTT01m_17710 | Plu3442 | hypothetical protein |
| PluTT01m_17720 | Plu3444 | hypothetical protein |
| PluTT01m_17725 | Plu3445 | hypothetical protein |
| PluTT01m_17730 | Plu3446 | hypothetical protein |
| PluTT01m_17740 | Plu3448 | hypothetical protein |
| PluTT01m_17750 | Plu3450 | hypothetical protein |
| PluTT01m_17755 | Plu3451 | hypothetical protein |
| PluTT01m_17790 | Plu3458 | hypothetical protein |
| PluTT01m_17795 | Plu3459 | hypothetical protein |
| PluTT01m_17815 | Plu3463 | hypothetical protein |
| PluTT01m_17835 | Plu3469 | hypothetical protein |
| PluTT01m_17860 | Plu3474 | hypothetical protein |
| PluTT01m_17870 | Plu3476 | hypothetical protein |
| PluTT01m_17875 | Plu3477 | hypothetical protein |
| PluTT01m_17880 | Plu3479 | hypothetical protein |
| PluTT01m_17890 | Plu3482 | hypothetical protein |
| PluTT01m_17895 | Plu3483 | hypothetical protein |
| PluTT01m_17900 | Plu3484 | hypothetical protein |
| PluTT01m_17902 | Plu3485 | hypothetical protein |
| PluTT01m_21670 | Plu4240 | hypothetical protein |
| PluTT01m_22095 | Plu4324 | hypothetical protein |
| PluTT01m_22115 | Plu4327 | hypothetical protein |
| PluTT01m_22120 | Plu4328 | hypothetical protein |
| PluTT01m_22130 | Plu4330 | hypothetical protein |

**Supplementary Table S5: Genes which are disrupted in only one *P. luminescens* strain.** In the 1<sup>st</sup> part, genes disrupted only in strain DJC are listed, in the 2<sup>nd</sup> part those disrupted only in strain TT01m. Proteins are sorted by code and thus along the genome. The disruption type is either targeted or pseudo. Type pseudo may have resulted from an in-frame stop codon, a frameshift, or gene truncation at one of its ends. Targeted means that the gene has suffered integration of a transposon or a MITE so that the coding region becomes non-contiguous. The fragments of the Cas3f protein, which has probably been targeted by a prophage (see Supplementary table S5), are shown in consecutive lines. In PGAP annotation, the fragments of a targeted gene are annotated as independent ORFs, each with its own code. For convenience, the codes of the corresponding ORFs in the published TT01 genome (*plu* numbers) are provided.

| genes with are disrupted only in <i>P. luminescens</i> strain DJC |                           |                 |          |                                                                      |
|-------------------------------------------------------------------|---------------------------|-----------------|----------|----------------------------------------------------------------------|
| regular gene                                                      | disrupted gene            | TT01 equivalent | type     | protein name/function                                                |
| PluTT01m_09245                                                    | PluDJC_09435              | <i>plu1791</i>  | pseudo   | (cas3f) type I-F CRISPR-associated helicase Cas3                     |
| PluTT01m_09245                                                    | PluDJC_09210              | <i>plu1791</i>  | pseudo   | (cas3f) type I-F CRISPR-associated helicase Cas3                     |
| PluTT01m_11310                                                    | PluDJC_11685              | <i>plu2191</i>  | pseudo   | (ectB) diaminobutyrate--2-oxoglutarate transaminase                  |
| PluTT01m_11700                                                    | PluDJC_12045              | <i>plu2268</i>  | pseudo   | DNA-binding protein                                                  |
| PluTT01m_11645                                                    | PluDJC_11997              | none            | pseudo   | DUF4184 domain-containing protein                                    |
| PluTT01m_17090                                                    | PluDJC_16945+PluDJC_16935 | <i>plu3324</i>  | targeted | MARTX multifunctional-autoprocessing repeats-in-toxin holotoxin RtxA |
| PluTT01m_02890                                                    | PluDJC_02820+PluDJC_02830 | <i>plu0567</i>  | targeted | MFS transporter                                                      |
| PluTT01m_11345                                                    | PluDJC_11703              | <i>plu2199</i>  | pseudo   | MFS transporter                                                      |
| PluTT01m_11320                                                    | PluDJC_11690              | <i>plu2193</i>  | pseudo   | TauD/TfdA family dioxygenase                                         |
| PluTT01m_04120                                                    | PluDJC_04090              | <i>plu0801</i>  | pseudo   | UPF0261 family protein                                               |
| PluTT01m_13885                                                    | PluDJC_14195+PluDJC_14200 | <i>plu2707</i>  | targeted | XRE family transcriptional regulator                                 |
| PluTT01m_04770                                                    | PluDJC_04770+PluDJC_04750 | <i>plu0927</i>  | targeted | MFS transporter                                                      |
| PluTT01m_19430                                                    | PluDJC_18720              | <i>plu3788</i>  | pseudo   | cysteine protease                                                    |
| PluTT01m_15520                                                    | PluDJC_15410              | <i>plu3018</i>  | pseudo   | glycosyltransferase family 2 protein                                 |
| PluTT01m_00785                                                    | PluDJC_00840+PluDJC_00845 | <i>plu0153</i>  | targeted | helicase                                                             |
| PluTT01m_19150                                                    | PluDJC_18430+PluDJC_18440 | <i>plu3735</i>  | targeted | helix-turn-helix transcriptional regulator                           |
| PluTT01m_12615                                                    | PluDJC_12940+PluDJC_12950 | <i>plu2453</i>  | targeted | hemagglutinin                                                        |
| PluTT01m_00600                                                    | PluDJC_00650+PluDJC_00655 | <i>plu0116</i>  | targeted | hypothetical protein                                                 |

|                                                                           |                               |                        |             |                                                                      |
|---------------------------------------------------------------------------|-------------------------------|------------------------|-------------|----------------------------------------------------------------------|
| PluTT01m_12025                                                            | PluDJC_12365+PluDJC_12370     | <i>plu2334</i>         | targeted    | hypothetical protein                                                 |
| PluTT01m_13610                                                            | PluDJC_13915+PluDJC_13905     | <i>plu2652</i>         | targeted    | hypothetical protein                                                 |
| PluTT01m_19765                                                            | PluDJC_19070+PluDJC_19060     | <i>plu3854</i>         | targeted    | hypothetical protein                                                 |
| PluTT01m_21825                                                            | PluDJC_21130+PluDJC_21120     | <i>plu4270</i>         | targeted    | nucleotidyl transferase AbiEii/AbiGii toxin family protein           |
| PluTT01m_22190                                                            | PluDJC_21485+PluDJC_21480     | <i>plu4344</i>         | targeted    | hypothetical protein                                                 |
| PluTT01m_07305                                                            | PluDJC_06920                  | <i>plu1415</i>         | pseudo      | hypothetical protein                                                 |
| PluTT01m_09465                                                            | PluDJC_09625                  | <i>plu1837</i>         | pseudo      | hypothetical protein                                                 |
| PluTT01m_15515                                                            | PluDJC_15415                  | <i>plu3017</i>         | pseudo      | hypothetical protein                                                 |
| PluTT01m_20440                                                            | PluDJC_19750                  | <i>plu3987</i>         | pseudo      | isopentenyl-diphosphate Delta-isomerase                              |
| PluTT01m_07670                                                            | PluDJC_07285                  | <i>plu1474</i>         | pseudo      | molybdenum-dependent transcriptional regulator                       |
| PluTT01m_11340                                                            | PluDJC_11700                  | <i>plu2198</i>         | pseudo      | phosphoribosylamine--glycine ligase                                  |
| PluTT01m_22075                                                            | PluDJC_21390                  | <i>plu4320</i>         | pseudo      | restriction endonuclease subunit S                                   |
| PluTT01m_22070                                                            | PluDJC_21365+PluDJC_21375     | <i>plu4319</i>         | targeted    | type I restriction-modification system subunit M                     |
| <b>genes with are disrupted only in <i>P. luminescens</i> strain TT01</b> |                               |                        |             |                                                                      |
| <b>regular gene</b>                                                       | <b>disrupted gene</b>         | <b>TT01 equivalent</b> | <b>type</b> | <b>protein name/function</b>                                         |
| PluDJC_07045                                                              | PluTT01m_07430                | <i>plu1438</i>         | pseudo      | (ilvE) branched-chain-amino-acid aminotransferase                    |
| PluDJC_20205                                                              | PluTT01m_20907+PluTT01m_20900 | <i>plu4083+plu4081</i> | targeted    | 3-hydroxy-3-methylglutaryl-CoA lyase                                 |
| PluDJC_21425                                                              | PluTT01m_22100                | none                   | pseudo      | AAA family ATPase                                                    |
| PluDJC_17095                                                              | PluTT01m_17245+PluTT01m_17235 | <i>plu3354+plu3352</i> | targeted    | ABC transporter ATP-binding protein                                  |
| PluDJC_11815                                                              | PluTT01m_11467                | none                   | pseudo      | DUF3018 domain-containing protein                                    |
| PluDJC_15080                                                              | PluTT01m_15180+PluTT01m_15170 | <i>plu2955+plu2953</i> | targeted    | DUF4431 domain-containing protein                                    |
| PluDJC_04355                                                              | PluTT01m_04395+PluTT01m_04385 | <i>plu0855+plu0853</i> | targeted    | HlyD family secretion protein                                        |
| PluDJC_09005                                                              | PluTT01m_09025+PluTT01m_09035 | <i>plu1745+plu1747</i> | targeted    | L,D-transpeptidase                                                   |
| PluDJC_06470                                                              | PluTT01m_06880+PluTT01m_06885 | <i>plu1339+plu1340</i> | targeted    | MARTX multifunctional-autoprocessing repeats-in-toxin holotoxin RtxA |
| PluDJC_16400                                                              | PluTT01m_16525+PluTT01m_16515 | <i>plu3209+plu3207</i> | targeted    | MARTX multifunctional-autoprocessing repeats-in-toxin holotoxin RtxA |
| PluDJC_11770                                                              | PluTT01m_11433                | none                   | pseudo      | RES domain-containing protein                                        |
| PluDJC_11530                                                              | PluTT01m_11155                | <i>plu2160</i>         | pseudo      | alpha/beta hydrolase                                                 |
| PluDJC_18410                                                              | PluTT01m_19120+PluTT01m_19110 | <i>plu3729+none</i>    | targeted    | helix-turn-helix transcriptional regulator                           |
| PluDJC_11480                                                              | PluTT01m_11112                | <i>plu2152</i>         | pseudo      | hypothetical protein                                                 |

|              |                               |                        |          |                                                  |
|--------------|-------------------------------|------------------------|----------|--------------------------------------------------|
| PluDJC_11490 | PluTT01m_11115                | none                   | pseudo   | hypothetical protein                             |
| PluDJC_11775 | PluTT01m_11437                | none                   | pseudo   | hypothetical protein                             |
| PluDJC_12115 | PluTT01m_11770                | <i>plu2281</i>         | pseudo   | hypothetical protein                             |
| PluDJC_12755 | PluTT01m_12415+PluTT01m_12425 | <i>plu2413+plu2415</i> | targeted | hypothetical protein                             |
| PluDJC_15835 | PluTT01m_15940                | none                   | pseudo   | hypothetical protein                             |
| PluDJC_17105 | PluTT01m_17265+PluTT01m_17255 | <i>plu3358+plu3356</i> | targeted | hypothetical protein                             |
| PluDJC_17250 | PluTT01m_17940                | <i>plu3493+plu3494</i> | pseudo   | hypothetical protein                             |
| PluDJC_20580 | PluTT01m_21285+PluTT01m_21302 | <i>plu4162+plu4166</i> | targeted | hypothetical protein                             |
| PluDJC_20785 | PluTT01m_21515+PluTT01m_21505 | <i>plu4209+plu4207</i> | targeted | hypothetical protein                             |
| PluDJC_22345 | PluTT01m_23065                | none                   | pseudo   | hypothetical protein                             |
| PluDJC_23045 | PluTT01m_23772+PluTT01m_23765 | none+ <i>plu4648</i>   | targeted | hypothetical protein                             |
| PluDJC_08520 | PluTT01m_08540+PluTT01m_08530 | <i>plu1647+plu1645</i> | targeted | photopexin B                                     |
| PluDJC_12360 | PluTT01m_12020                | <i>plu2331+plu2332</i> | pseudo   | plasmid stabilization protein ParE               |
| PluDJC_22365 | PluTT01m_23085+PluTT01m_23095 | <i>plu4517+plu4520</i> | targeted | sensor histidine kinase                          |
| PluDJC_09205 | PluTT01m_09240                | <i>plu1790</i>         | pseudo   | subtype I-F CRISPR-associated endonuclease Cas1  |
| PluDJC_21460 | PluTT01m_22160+PluTT01m_22170 | <i>plu4338+plu4340</i> | targeted | type 2 isopentenyl-diphosphate Delta-isomerase   |
| PluDJC_15065 | PluTT01m_15155                | <i>plu2949+plu2950</i> | pseudo   | type II toxin-antitoxin system HicA family toxin |
| PluDJC_16650 | PluTT01m_16795+PluTT01m_16775 | <i>plu3259</i> +none   | targeted | type VI secretion protein ImpK                   |

**Supplementary Table S6: Prophages as predicted by PhiSpy and Prophinder.** A total of 21 prophage regions have been identified (Region). Regions are non-overlapping except for the longest prediction in R16 which overlaps with prophages in R15. Method terms consist of a letter indicating the method, a serial number (by method), and a genome indicator. Alternatively, the term "targeting" is assigned (see below). DJC refers to strain DJC, TT01m to the newly sequenced version of strain TT01 and TT01 to the published version of TT01. The letter S indicates a PhiSpy prediction, the letter A a prediction with Prophinder from the ACLAME server. PhiSpy predictions of the newly sequenced genomes were computed with the initial, non-curated PGAP annotation. For the published strain TT01, the Prophinder prediction was retrieved from the ACLAME server rather than being recomputed. For each prediction, the position in the corresponding genome and the predicted prophage length are indicated. For prophages from strain DJC and from the published version of the TT01 genome, the corresponding positions of the TT01m genome were identified to permit positional comparisons (column "relocated to TT01m"). Prophages in DJC inserts do not have an equivalent on the TT01m genome (indicated by "none"). Coordinates in parenthesis indicate that the prophage terminus could not be located on the TT01m genome as it is not located on a matchSEG. The methods term "targeting" refers to a manual assignment of prophage boundaries, which is based on analysis of splitting (or targeting) of protein-coding genes. Relevant details are mentioned in the comment column, commonly referenced to supplementary tables S1 and S2, including the serial number of that table.

| Region | Method     | relocated to TT01m | assigned to TT01m | length | assigned to TT01 | length | assigned to DJC | length | comment                        |
|--------|------------|--------------------|-------------------|--------|------------------|--------|-----------------|--------|--------------------------------|
| R01    | S.01.TT01m | 11631-29965        | 11631-29965       | 18335  |                  |        |                 |        | TabS1#1 and TabS2#4: inversion |
|        | A.01.TT01m | 10251-28978        | 10251-28978       | 18728  |                  |        |                 |        |                                |
|        | S.01.TT01  | 1627-40946         |                   |        | 1627-40947       | 39321  |                 |        |                                |
|        | A.01.TT01  | 10251-30131        |                   |        | 10251-29999      | 19881  |                 |        |                                |
|        | S.01.DJC   | 11631-29792        |                   |        |                  |        | 11760-28906     | 17147  |                                |
|        | A.01.DJC   | 10251-29792        |                   |        |                  |        | 10380-30039     | 19660  |                                |
| R02    | S.02.TT01m | 354332-398796      | 354332-398796     | 44465  |                  |        |                 |        |                                |

|     |            |                   |                 |        |                 |        |                 |        |                                                                                                                                                                       |
|-----|------------|-------------------|-----------------|--------|-----------------|--------|-----------------|--------|-----------------------------------------------------------------------------------------------------------------------------------------------------------------------|
|     | S.02.TT01  | 345438-372676     |                 |        | 345439-372677   | 27239  |                 |        | TabS2#11: 25 kb insert in TT01m                                                                                                                                       |
| R03 | S.03.TT01  | 985469-1029860    |                 |        | 985470-1029861  | 44392  |                 |        |                                                                                                                                                                       |
| R04 | S.03.TT01m | 1131700-1236267   | 1131700-1236267 | 104568 |                 |        |                 |        | TabS2#46: 79 kb insert in TT01m                                                                                                                                       |
|     | S.04.TT01m | 1256241-1344812   | 1256241-1344812 | 88572  |                 |        |                 |        |                                                                                                                                                                       |
|     | S.04.TT01  | 1205149-1342771   |                 |        | 1205150-1342771 | 137622 |                 |        |                                                                                                                                                                       |
|     | S.02.DJC   | 1194937-1238177   |                 |        |                 |        | 1187220-1230460 | 43241  |                                                                                                                                                                       |
| R05 | S.05.TT01m | 1553214-1629188   | 1553214-1629188 | 75975  |                 |        |                 |        | TabS2#50+51: 11+12 kb inserts in TT01m                                                                                                                                |
|     | S.05.TT01  | 1552827-1642788   |                 |        | 1552827-1642788 | 89962  |                 |        |                                                                                                                                                                       |
| R06 | S.03.DJC   | (1925016)-1933095 |                 |        |                 |        | 1805394-1868951 | 63558  | TabS2#64: a 57 kb seq in DJC replaces a 5 kb seq in TT01m; within the 57 kb seq, 25 kb integrated into holin (PluTT01m_14920) at pos 79 (PluDJC_07980 + PluDJC_08180) |
|     | A.02.DJC   | none              |                 |        |                 |        | 1803738-1860591 | 56854  |                                                                                                                                                                       |
|     | targeting  | none              |                 |        |                 |        | 1811642-1837064 | 25423  |                                                                                                                                                                       |
| R07 | S.06.TT01m | 1983764-2058103   | 1983764-2058103 | 74340  |                 |        |                 |        |                                                                                                                                                                       |
|     | A.02.TT01  | 1899374-2067669   |                 |        | 1899373-2067668 | 168296 |                 |        |                                                                                                                                                                       |
|     | S.04.DJC   | 1983764-2058103   |                 |        |                 |        | 1918622-1991868 | 73247  |                                                                                                                                                                       |
| R08 | S.05.DJC   | 2060560-(2134738) |                 |        |                 |        | 1994325-2094935 | 100611 | TabS2#77: 32 kb insert in DJC; 32 kb integrated into Cas3f (PluTT01m_09245) at pos 348/350 (PluDJC_09210 + PluDJC_09435)                                              |
|     | A.03.DJC   | none              |                 |        |                 |        | 2068170-2100179 | 32010  |                                                                                                                                                                       |
|     | targeting  | -                 |                 |        |                 |        | 2067895-2100517 | 32623  |                                                                                                                                                                       |
| R09 | S.06.TT01  | 2182872-2197280   |                 |        | 2182871-2197279 | 14409  |                 |        |                                                                                                                                                                       |
| R10 | S.07.TT01m | 2361471-2406629   | 2361471-2406629 | 45159  |                 |        |                 |        | TabS2#91: 34 kb insert in DJC                                                                                                                                         |
|     | S.06.DJC   | 2338244-2406629   |                 |        |                 |        | 2283028-2386921 | 103894 |                                                                                                                                                                       |
|     | A.04.DJC   | 2372414-(2395527) |                 |        |                 |        | 2317712-2375670 | 57959  |                                                                                                                                                                       |
| R11 | S.07.TT01  | 2675668-2690815   |                 |        | 2675668-2690815 | 15148  |                 |        |                                                                                                                                                                       |
| R12 | S.08.TT01m | 2800483-2864064   | 2800483-2864064 | 63582  |                 |        |                 |        |                                                                                                                                                                       |
|     | S.07.DJC   | 2800483-2864064   |                 |        |                 |        | 2765960-2828418 | 62459  |                                                                                                                                                                       |
| R13 | S.09.TT01m | 2973221-2980853   | 2973221-2980853 | 7633   |                 |        |                 |        |                                                                                                                                                                       |
|     | S.08.TT01  | 2973651-2990529   |                 |        | 2973651-2990529 | 16879  |                 |        |                                                                                                                                                                       |



|           |                 |                     |                 |        |                 |                 |                 |       |                                                                                                                                           |
|-----------|-----------------|---------------------|-----------------|--------|-----------------|-----------------|-----------------|-------|-------------------------------------------------------------------------------------------------------------------------------------------|
|           | S.08.DJC        | 2973221-2980853     |                 |        |                 |                 | 2927782-2935387 | 7606  |                                                                                                                                           |
| R14       | S.10.TT01m      | 3409521-3483231     | 3409521-3483231 | 73711  |                 |                 |                 |       | TabS1#18: inversion;<br>TabS2#141: 46 kb insert in TT01m; TabS2#147: a 3 kb seq in DJC replaces a 5 kb seq in TT01m; TabS2#148: inversion |
|           | S.11.TT01m      | 3486008-3545456     | 3486008-3545456 | 59449  |                 |                 |                 |       |                                                                                                                                           |
|           | A.02.TT01m      | 3403657-3466572     | 3403657-3466572 | 62916  |                 |                 |                 |       |                                                                                                                                           |
|           | A.03.TT01m      | 3512862-3535872     | 3512862-3535872 | 23011  |                 |                 |                 |       |                                                                                                                                           |
|           | S.09.TT01       | 3410147-3482744     |                 |        | 3410157-3482754 | 72598           |                 |       |                                                                                                                                           |
|           | S.10.TT01       | 3508312-3545456     |                 |        | 3508362-3545466 | 37105           |                 |       |                                                                                                                                           |
|           | A.03.TT01       | 3403657-3456009     |                 |        | 3403667-3456019 | 52353           |                 |       |                                                                                                                                           |
|           | A.04.TT01       | 3459809-3468139     |                 |        | 3459819-3468149 | 8331            |                 |       |                                                                                                                                           |
|           | A.05.TT01       | 3508312-3537375     |                 |        | 3508362-3537385 | 29064           |                 |       |                                                                                                                                           |
|           | S.09.DJC        | 3457221-3555249     |                 |        |                 |                 | 3368371-3462728 | 94358 |                                                                                                                                           |
| A.05.DJC  | 3523645-3537375 |                     |                 |        |                 | 3431232-3444835 | 13604           |       |                                                                                                                                           |
| R15       | A.06.TT01       | 3955218-3963518     |                 |        | 3955228-3963528 | 8301            |                 |       |                                                                                                                                           |
|           | S.10.DJC        | 3941105-3963518     |                 |        |                 |                 | 3844766-3868321 | 23556 |                                                                                                                                           |
| R16       | S.12.TT01m      | 3954877-4099465     | 3954877-4099465 | 144589 |                 |                 |                 |       | TabS2#169: 78 kb insert in TT01m; 33 kb integrated into a probable restriction methylase at pos 179/180 (PluTT01m_17810 + PluTT01m_17570) |
|           | A.04.TT01m      | 4007641-4076272     | 4007641-4076272 | 68632  |                 |                 |                 |       |                                                                                                                                           |
|           | S.11.TT01       | 3993859-4097445     |                 |        | 3993869-4097455 | 103587          |                 |       |                                                                                                                                           |
|           | A.07.TT01       | 4007641-4076272     |                 |        | 4007651-4076282 | 68632           |                 |       |                                                                                                                                           |
|           | A.08.TT01       | 4086051-4092697     |                 |        | 4086061-4092707 | 6647            |                 |       |                                                                                                                                           |
| targeting | 4035291-4068784 |                     | 33494           | -      |                 |                 |                 |       |                                                                                                                                           |
| R17       | S.11.DJC        | 4350893-4360656     |                 |        |                 |                 | 4146494-4189653 | 43160 | TabS2#178: 31 kb insert in DJC                                                                                                            |
| R18       | A.09.TT01       | 4367130-4421804     |                 |        | 4368413-4423087 | 54675           |                 |       |                                                                                                                                           |
| R19       | S.12.TT01       | 4563989-4567477     |                 |        | 4565272-4568760 | 3489            |                 |       |                                                                                                                                           |
| R20       | S.13.TT01       | 4721243-4744725     |                 |        | 4722526-4746008 | 23483           |                 |       |                                                                                                                                           |
| R21       | S.12.DJC        | (5559201)-(5565234) |                 |        |                 |                 | 5375312-5416648 | 41337 | TabS2#223: 35 kb insert in DJC                                                                                                            |
|           | A.06.DJC        | none                |                 |        |                 |                 | 5384214-5405709 | 21496 |                                                                                                                                           |

**Supplementary Table S7: Copies of phage-related Repeat A (PhRepA) in the three *P. luminescens* strains.** All copies of PhRepA are listed for the three analyzed genomes. The absence of a copy is indicated by dashes. Comments refer to the published version of strain TT01 (TT01), the new version of strain TT01 (TT01m) or strain DJC (DJC). For a description of the remnants B3 and D3 in strain DJC see the main text. Targeting by transposons (ISPlu9 or ISPlu20) is indicated.

|    | <i>P. luminescens</i> TT01 |        | <i>P. luminescens</i> TT01m |        | <i>P. luminescens</i> DJC |        | comment                                                                                |
|----|----------------------------|--------|-----------------------------|--------|---------------------------|--------|----------------------------------------------------------------------------------------|
|    | position                   | length | position                    | length | position                  | length |                                                                                        |
| A  | 598129-618518              | 20390  | 598128-618517               | 20390  | 571779-596010             | 24232  | intergenic ISPlu20 and adhesion protein targeted by ISPlu20 (DJC)                      |
| B1 | 1304044-1313484            | 9441   | 1304043-1313483             | 9441   | -                         | -      |                                                                                        |
| B2 | 1313485-1321148            | 7664   | 1313484-1321147             | 7664   | -                         | -      |                                                                                        |
| B3 | 1321149-1336602            | 15454  | 1321148-1336602             | 15455  | 1239023-1246825           | -      | remnant in DJC                                                                         |
| C  | 1620317-1638691            | 18375  | 1620317-1638691             | 18375  | 1506787-1527245           | 20459  | primase targeted by ISPlu9 (TT01/ TT01m); ISPlu20 targets a hypothetical protein (DJC) |
| D1 | 4218342-4227209            | 8868   | 4218335-4227202             | 8868   | -                         | -      | intergenic ISPlu9 (TT01/ TT01m)                                                        |
| D2 | -                          | -      | 4227203-4236070             | 8868   | -                         | -      | intergenic ISPlu9 (TT01m)                                                              |
| D3 | 4227210-4242480            | 15271  | 4236071-4251342             | 15272  | 4040907-4047311           | 6405   | intergenic ISPlu9 (TT01/ TT01m); remnant in DJC                                        |
| E1 | 4341138-4348505            | 7368   | 4350000-4357367             | 7368   | 4145601-4156591           | 10991  |                                                                                        |
| E2 | 4348506-4357149            | 8644   | -                           | -      | 4156592-4165227           | 8636   |                                                                                        |
| E3 | 4357150-4366039            | 8890   | 4357368-4364756             | 7389   | -                         | -      | intergenic ISPlu9 (in TT01 but not in TT01m)                                           |
| E4 | 4366040-4383140            | 17101  | 4364757-4381857             | 17101  | -                         | -      | intergenic ISPlu9 (TT01/ TT01m)                                                        |
| E5 | -                          | -      | -                           | -      | 4165228-4172583           | 7356   |                                                                                        |
| E6 | -                          | -      | -                           | -      | 4172584-4179942           | 7359   |                                                                                        |
| E7 | -                          | -      | -                           | -      | 4179943-4187655           | 7713   |                                                                                        |
| E8 | -                          | -      | -                           | -      | 4187656-4203159           | 15504  |                                                                                        |

**Supplementary Table S8: Genes and intergenic regions on PhRepA in the element copies.** All genes and intergenic regions (as specified in the column "blocktype") occurring in copies of PhRepA are listed. These are the raw data from which Fig. 4b and 4c have been drawn. (a) for intergenic regions, there is commonly only one line for each strain which contains the distance between the adjacent genes in the corresponding column. Negative numbers indicate gene overlaps. The corresponding genes are commonly in the adjacent gene block but in few cases they are several blocks apart. The final intergenic block defines the distance to the start of the element. For some element copies, there is no upstream gene. In this case, the value represents the distance to the end of the element copy. In the few cases where a linetype 2 is used for an intergenic region, this specifies a transposon which has targetted this region. (b) For genes, the column "master\_gene" lists the code of a protein which represents this gene. The column "description" lists the key domains (from InterPro) if assigned. The "adhesion" protein is referenced as such and not through the assigned domains. If no domain is assigned, the code under "master\_gene" is repeated with the extension "-like". Genes are classified into a "subthread". At one end of the element are the "core" genes, on the other end of complete elements is the "adhesion" gene. There are five main threads (a: *plu0547*; b: *plu1129* plus *plu1130*; c: immunity\_8 (imm8); d: VENN set 1; e: VENN set 2). Due to considerable heterogeneity, subthread b is subdivided into b1-b5. This subthread shows hybrid element formation as evident by comparing elements from *P. luminescens* strains TT01 and DJC. Threads and subthreads are indicated in Fig.4b and 4c. For each gene, there are multiple lines. Linetype 1 always refers to the protein code (ordered locus tag) of the protein from the corresponding strain. The term "notAnno" indicates that the corresponding ORF is not annotated in the TT01 genome; for the TT01m and DJC, notAnno cannot be assigned as we have post-predicted these ORFs if necessary. Linetype 2 always lists the subtype of the gene as reflected by an ORF code. Linetype 3 always lists the length of the gene in bp. For the adhesion protein, linetype 4 lists the length in codons, unless the gene is truncated. Linetype 5 indicates protein characteristics ("ok": a complete, probably functional protein; "Cfrag": most of the N-terminal region is truncated away, which is typical for non-terminal clustered element copies; "Nfrag": missing C-terminus due to truncation; "disrupted": the gene is nearly full-length but a few terminal residues are missing; "split\_Plu20": the gene has been targeted by transposon ISPlu20; "DomainFused": the N-terminal region of the corresponding protein represents an adhesion factor that is fused to a C-terminal Plu1130-like domain. For other protein-coding genes, linetype 4 may indicate targetting by a transposon (ISPlu9, ISPlu20) or may point to gene disruption (Cfrag) of a secondary copy of a core gene.

| blocktype | strain | linetype | subthread | copies of PhRepA |    |                |                |                |    |    |                |    |    |    |                |    |    | description | master_gene |          |                |
|-----------|--------|----------|-----------|------------------|----|----------------|----------------|----------------|----|----|----------------|----|----|----|----------------|----|----|-------------|-------------|----------|----------------|
|           |        |          |           | A                | B1 | B2             | B3             | C              | D1 | D2 | D3             | E1 | E2 | E3 | E4             | E5 | E6 |             |             | E7       | E8             |
| gene      | TT01   | 1        | adhesion  | <i>plu0548</i>   | -  | <i>plu1140</i> | <i>plu1149</i> | <i>plu1367</i> | -  | -  | <i>plu3594</i> | -  | -  | -  | <i>plu3718</i> | -  | -  | -           | -           | adhesion | <i>plu0548</i> |
|           |        | 2        |           | <i>plu0548</i>   | -  | <i>plu1149</i> | <i>plu1149</i> | <i>plu1367</i> | -  | -  | <i>plu3594</i> | -  | -  | -  | <i>plu3718</i> | -  | -  | -           | -           |          |                |
|           |        | 3        |           | 13749            | -  | 1023           | 8814           | 8886           | -  | -  | 6408           | -  | -  | -  | 9084           | -  | -  | -           | -           |          |                |
|           |        | 4        |           | 4582             | -  | -              | 2937           | 2961           | -  | -  | 2135           | -  | -  | -  | 3027           | -  | -  | -           | -           |          |                |
|           |        | 5        |           | ok               | -  | Cfrag          | ok             | ok             | -  | -  | ok             | -  | -  | -  | DomainFused    | -  | -  | -           | -           |          |                |
|           | TT01m  | 1        |           | PluTT01m_02795   | -  | PluTT01m_05820 | PluTT01m_05865 | PluTT01m_07020 | -  | -  | PluTT01m_18475 | -  | -  | -  | PluTT01m_19050 | -  | -  | -           | -           |          |                |
|           |        | 2        |           | <i>plu0548</i>   | -  | -              | <i>plu1149</i> | <i>plu1367</i> | -  | -  | <i>plu3594</i> | -  | -  | -  | <i>plu3718</i> | -  | -  | -           | -           |          |                |
|           |        | 3        |           | 13749            | -  | 1038           | 8814           | 8886           | -  | -  | 6408           | -  | -  | -  | 9084           | -  | -  | -           | -           |          |                |
|           |        | 4        |           | 4582             | -  | -              | 2937           | 2961           | -  | -  | 2135           | -  | -  | -  | 3027           | -  | -  | -           | -           |          |                |

|            |           |   |                                       |   |       |                  |                  |   |   |                  |   |   |    |             |              |              |                |                |   |   |
|------------|-----------|---|---------------------------------------|---|-------|------------------|------------------|---|---|------------------|---|---|----|-------------|--------------|--------------|----------------|----------------|---|---|
|            |           | 5 | ok                                    | - | Cfrag | ok               | ok               | - | - | ok               | - | - |    | DomainFused | -            | -            | -              | -              |   |   |
|            | DJC       | 1 | PluDJC_02<br>725+<br>PluDJC_02<br>705 | - | -     | PluDJC_05<br>470 | PluDJC_066<br>30 | - | - | PluDJC_17<br>655 | - | - | -  | -           | -            | -            | PluDJC_18325   | PluDJC_18360   |   |   |
|            |           | 2 | <i>plu0548</i>                        | - | -     | -                | <i>plu1367</i>   | - | - | -                | - | - | -  | -           | -            | -            | <i>plu1149</i> | <i>plu1149</i> |   |   |
|            |           | 3 | 8475+5280                             | - | -     | 7803             | 8886             | - | - | 9057             | - | - | -  | -           | -            | -            | 642            | 8916           |   |   |
|            |           | 4 | 2825+1759                             | - | -     | -                | 2961             | - | - | 3018             | - | - | -  | -           | -            | -            | -              | 2971           |   |   |
|            |           | 5 | split_Plu20                           | - | -     | Nfrag            | ok               | - | - | gene fusion      | - | - | -  | -           | -            | -            | Nfrag          | ok             |   |   |
| intergenic | TT0<br>1  | 1 | 8                                     | - | 8     | 8                | -11              | - | - | 16               | - | - | 14 | 14          | -            | -            | -              | -              | - | - |
|            | TT0<br>1m | 1 | 8                                     | - | 8     | 8                | -11              | - | - | 16               | - | - | 14 | 14          | -            | -            | -              | -              | - | - |
|            | DJC       | 1 | -                                     | - | -     | -                | -11              | - | - | -                | - | - | -  | -           | 66           | 66           | 6              | 6              | - | - |
| gene       | TT0<br>1  | 1 | -                                     | - | -     | -                | -                | - | - | -                | - | - | -  | -           | -            | -            | -              | -              | - | - |
|            |           | 2 | -                                     | - | -     | -                | -                | - | - | -                | - | - | -  | -           | -            | -            | -              | -              | - | - |
|            |           | 3 | -                                     | - | -     | -                | -                | - | - | -                | - | - | -  | -           | -            | -            | -              | -              | - | - |
|            | TT0<br>1m | 1 | -                                     | - | -     | -                | -                | - | - | -                | - | - | -  | -           | -            | -            | -              | -              | - | - |
|            |           | 2 | -                                     | - | -     | -                | -                | - | - | -                | - | - | -  | -           | -            | -            | -              | -              | - | - |
|            |           | 3 | -                                     | - | -     | -                | -                | - | - | -                | - | - | -  | -           | -            | -            | -              | -              | - | - |
|            | DJC       | 1 | -                                     | - | -     | -                | -                | - | - | -                | - | - | -  | -           | -            | -            | PluDJC_18320   | PluDJC_18355   | - | - |
|            |           | 2 | -                                     | - | -     | -                | -                | - | - | -                | - | - | -  | -           | -            | -            | PAU_03360      | PAU_03360      | - | - |
|            |           | 3 | -                                     | - | -     | -                | -                | - | - | -                | - | - | -  | -           | -            | -            | 390            | 390            | - | - |
| gene       | TT0<br>1  | 1 | -                                     | - | -     | -                | -                | - | - | -                | - | - | -  | -           | -            | -            | -              | -              | - | - |
|            |           | 2 | -                                     | - | -     | -                | -                | - | - | -                | - | - | -  | -           | -            | -            | -              | -              | - | - |
|            |           | 3 | -                                     | - | -     | -                | -                | - | - | -                | - | - | -  | -           | -            | -            | -              | -              | - | - |
|            | TT0<br>1m | 1 | -                                     | - | -     | -                | -                | - | - | -                | - | - | -  | -           | -            | -            | -              | -              | - | - |
|            |           | 2 | -                                     | - | -     | -                | -                | - | - | -                | - | - | -  | -           | -            | -            | -              | -              | - | - |
|            |           | 3 | -                                     | - | -     | -                | -                | - | - | -                | - | - | -  | -           | -            | -            | -              | -              | - | - |
|            | DJC       | 1 | -                                     | - | -     | -                | -                | - | - | -                | - | - | -  | -           | PluDJC_18245 | PluDJC_18290 | -              | -              | - | - |
|            |           | 2 | -                                     | - | -     | -                | -                | - | - | -                | - | - | -  | -           | XSR1_930001  | XSR1_930001  | -              | -              | - | - |
|            |           | 3 | -                                     | - | -     | -                | -                | - | - | -                | - | - | -  | -           | 891          | 891          | -              | -              | - | - |
| intergenic | TT0<br>1  | 1 | -                                     | - | -     | -                | -                | - | - | -                | - | - | -  | -           | -            | -            | -              | -              | - | - |
|            | TT0<br>1m | 1 | -                                     | - | -     | -                | -                | - | - | -                | - | - | -  | -           | -            | -            | -              | -              | - | - |
|            | DJC       | 1 | -                                     | - | -     | -                | -                | - | - | -                | - | - | -  | -           | 12           | 12           | -              | -              | - | - |
| gene       | TT0<br>1  | 1 | -                                     | - | -     | -                | -                | - | - | -                | - | - | -  | -           | -            | -            | -              | -              | - | - |
|            |           | 2 | -                                     | - | -     | -                | -                | - | - | -                | - | - | -  | -           | -            | -            | -              | -              | - | - |
|            |           | 3 | -                                     | - | -     | -                | -                | - | - | -                | - | - | -  | -           | -            | -            | -              | -              | - | - |
|            | TT0<br>1m | 1 | -                                     | - | -     | -                | -                | - | - | -                | - | - | -  | -           | -            | -            | -              | -              | - | - |
|            |           | 2 | -                                     | - | -     | -                | -                | - | - | -                | - | - | -  | -           | -            | -            | -              | -              | - | - |
|            |           | 3 | -                                     | - | -     | -                | -                | - | - | -                | - | - | -  | -           | -            | -            | -              | -              | - | - |
|            | DJC       | 1 | -                                     | - | -     | -                | -                | - | - | -                | - | - | -  | -           | PluDJC_18235 | PluDJC_18280 | -              | -              | - | - |













|            |           |   |                |                |                |                |                |                |                |                |                |                |                |                |                |                |                |                |                      |                |   |
|------------|-----------|---|----------------|----------------|----------------|----------------|----------------|----------------|----------------|----------------|----------------|----------------|----------------|----------------|----------------|----------------|----------------|----------------|----------------------|----------------|---|
|            |           | 3 | -              | -              | -              | -              | 318            | -              | -              | -              | 318            | 318            | -              | -              | -              | -              | -              | -              |                      |                |   |
| gene       | TT0<br>1  | 1 | <i>plu0547</i> | -              | <i>plu1139</i> | <i>plu1148</i> | -              | -              | -              | -              | -              | -              | -              | -              | -              | -              | -              | -              | <i>plu0547</i> -like | <i>plu0547</i> |   |
|            |           | 2 | <i>plu0547</i> | -              | <i>plu0547</i> | <i>plu0547</i> | -              | -              | -              | -              | -              | -              | -              | -              | -              | -              | -              | -              |                      |                | - |
|            |           | 3 | 420            | -              | 420            | 420            | -              | -              | -              | -              | -              | -              | -              | -              | -              | -              | -              | -              |                      |                | - |
|            | TT0<br>1m | 1 | PluTT01m_02790 | -              | PluTT01m_05815 | PluTT01m_05855 | -              | -              | -              | -              | -              | -              | -              | -              | -              | -              | -              | -              |                      |                | - |
|            |           | 2 | <i>plu0547</i> | -              | <i>plu0547</i> | <i>plu0547</i> | -              | -              | -              | -              | -              | -              | -              | -              | -              | -              | -              | -              |                      |                | - |
|            |           | 3 | 420            | -              | 420            | 420            | -              | -              | -              | -              | -              | -              | -              | -              | -              | -              | -              | -              |                      |                | - |
|            | DJC       | 1 | PluDJC_02700   | -              | -              | -              | -              | -              | -              | -              | -              | -              | -              | -              | -              | -              | -              | -              |                      |                | - |
|            |           | 2 | <i>plu0547</i> | -              | -              | -              | -              | -              | -              | -              | -              | -              | -              | -              | -              | -              | -              | -              |                      |                | - |
|            |           | 3 | 420            | -              | -              | -              | -              | -              | -              | -              | -              | -              | -              | -              | -              | -              | -              | -              |                      |                | - |
| intergenic | TT0<br>1  | 1 | 45             | 44             | 45             | 45             | 44             | 42             | -              | 42             | 44             | 44             | 52             | 52             | -              | -              | -              | -              | -                    |                |   |
|            | TT0<br>1m | 1 | 45             | 44             | 45             | 45             | 44             | 42             | 42             | 44             | -              | 44             | 52             | 52             | -              | -              | -              | -              | -                    |                |   |
|            | DJC       | 1 | 45             | -              | -              | -              | 44             | -              | -              | 44             | 44             | -              | -              | 47             | 47             | 78             | 78             | -              | -                    |                |   |
| gene       | TT0<br>1  | 1 | <i>plu0546</i> | <i>plu1128</i> | <i>plu1138</i> | <i>plu1147</i> | <i>plu1364</i> | <i>plu3582</i> | -              | <i>plu3591</i> | <i>plu3691</i> | <i>plu3699</i> | <i>plu3707</i> | <i>plu3716</i> | -              | -              | -              | -              | Toxin_SymE           | <i>plu0546</i> |   |
|            |           | 2 | <i>plu0546</i> | <i>plu1128</i> | <i>plu0546</i> | <i>plu0546</i> | <i>plu1128</i> | <i>plu0546</i> | -              | <i>plu0546</i> | <i>plu1128</i> | <i>plu1128</i> | <i>plu3707</i> | <i>plu3707</i> | -              | -              | -              | -              |                      |                |   |
|            |           | 3 | 243            | 243            | 243            | 243            | 243            | 243            | -              | 243            | 243            | 243            | 228            | 228            | -              | -              | -              | -              |                      |                |   |
|            | TT0<br>1m | 1 | PluTT01m_02785 | PluTT01m_05745 | PluTT01m_05810 | PluTT01m_05850 | PluTT01m_07000 | PluTT01m_18380 | PluTT01m_18420 | PluTT01m_18460 | PluTT01m_18950 | -              | PluTT01m_18990 | PluTT01m_19040 | -              | -              | -              | -              |                      |                |   |
|            |           | 2 | <i>plu0546</i> | <i>plu1128</i> | <i>plu0546</i> | <i>plu0546</i> | <i>plu1128</i> | <i>plu0546</i> | <i>plu0546</i> | <i>plu0546</i> | <i>plu1128</i> | -              | <i>plu3707</i> | <i>plu3707</i> | -              | -              | -              | -              |                      |                |   |
|            |           | 3 | 243            | 243            | 243            | 243            | 243            | 243            | 243            | 243            | 243            | -              | 228            | 228            | -              | -              | -              | -              |                      |                |   |
|            | DJC       | 1 | PluDJC_02695   | -              | -              | -              | PluDJC_06570   | -              | -              | -              | PluDJC_18140   | PluDJC_18185   | -              | -              | PluDJC_18230   | PluDJC_18275   | PluDJC_18315   | PluDJC_18350   |                      |                |   |
|            |           | 2 | <i>plu0546</i> | -              | -              | -              | <i>plu1128</i> | -              | -              | -              | <i>plu1128</i> | <i>plu1128</i> | -              | -              | <i>plu0546</i> | <i>plu0546</i> | <i>plu1128</i> | <i>plu1128</i> |                      |                |   |
|            |           | 3 | 243            | -              | -              | -              | 243            | -              | -              | -              | 243            | 243            | -              | -              | 243            | 243            | 243            | 243            |                      |                |   |
| intergenic | TT0<br>1  | 1 | 98             | 92             | 98             | 98             | 92             | 102            | -              | 102            | 92             | 92             | 72             | 72             | -              | -              | -              | -              | -                    |                |   |
|            | TT0<br>1m | 1 | 98             | 92             | 98             | 98             | 92             | 102            | 102            | 102            | 92             | -              | 72             | 72             | -              | -              | -              | -              | -                    |                |   |
|            | DJC       | 1 | 98             | -              | -              | -              | 92             | -              | -              | -              | 16+84          | 92             | -              | -              | 98             | 98             | 74             | 74             | -                    |                |   |
|            |           | 2 | -              | -              | -              | -              | -              | -              | -              | -              | Plu20          | -              | -              | -              | -              | -              | -              | -              | -                    |                |   |
| gene       | TT0<br>1  | 1 | <i>plu0545</i> | <i>plu1127</i> | <i>plu1137</i> | <i>plu1146</i> | <i>plu1363</i> | <i>plu3581</i> | -              | <i>plu3590</i> | <i>plu3690</i> | <i>plu3698</i> | <i>plu3706</i> | <i>plu3715</i> | -              | -              | -              | -              | Cro/C1-type_HTH      | <i>plu0545</i> |   |
|            |           | 2 | <i>plu0545</i> | <i>plu1127</i> | <i>plu0545</i> | <i>plu0545</i> | <i>plu1127</i> | <i>plu3581</i> | -              | <i>plu3581</i> | <i>plu1127</i> | <i>plu1127</i> | <i>plu3706</i> | <i>plu3706</i> | -              | -              | -              | -              |                      |                |   |
|            |           | 3 | 336            | 339            | 336            | 336            | 339            | 387            | -              | 387            | 339            | 339            | 363            | 363            | -              | -              | -              | -              |                      |                |   |
|            | TT0<br>1m | 1 | PluTT01m_02780 | PluTT01m_05740 | PluTT01m_05805 | PluTT01m_05845 | PluTT01m_06995 | PluTT01m_18375 | PluTT01m_18415 | PluTT01m_18455 | PluTT01m_18945 | -              | PluTT01m_18985 | PluTT01m_19035 | -              | -              | -              | -              |                      |                |   |
|            |           | 2 | <i>plu0545</i> | <i>plu1127</i> | <i>plu0545</i> | <i>plu0545</i> | <i>plu1127</i> | <i>plu3581</i> | <i>plu3581</i> | <i>plu3581</i> | <i>plu1127</i> | -              | <i>plu3706</i> | <i>plu3706</i> | -              | -              | -              | -              |                      |                |   |
|            |           | 3 | 372            | 339            | 339            | 339            | 339            | 387            | 387            | 387            | 339            | -              | 363            | 363            | -              | -              | -              | -              |                      |                |   |
|            | DJC       | 1 | PluDJC_02690   | -              | -              | -              | PluDJC_06565   | -              | -              | -              | PluDJC_18120   | PluDJC_18180   | -              | -              | PluDJC_18225   | PluDJC_18270   | PluDJC_18310   | PluDJC_18345   |                      |                |   |
|            |           | 2 | <i>plu0545</i> | -              | -              | -              | <i>plu1127</i> | -              | -              | -              | <i>plu1127</i> | <i>plu1127</i> | -              | -              | <i>plu0545</i> | <i>plu0545</i> | PTE_00007      | PTE_00007      |                      |                |   |
|            |           | 3 | 372            | -              | -              | -              | 339            | -              | -              | -              | 339            | 339            | -              | -              | 339            | 339            | 399            | 399            |                      |                |   |
| int        | TT0<br>1  | 1 | 187            | 132            | 187            | 187            | 132            | 101            | -              | 101            | 132            | 132            | 132            | 132            | -              | -              | -              | -              | -                    |                |   |

|      |            |     |      |                               |                |                |                |                |                                   |                |                |                |                |                |                |                |                |                |                |                |                      |                |   |   |  |
|------|------------|-----|------|-------------------------------|----------------|----------------|----------------|----------------|-----------------------------------|----------------|----------------|----------------|----------------|----------------|----------------|----------------|----------------|----------------|----------------|----------------|----------------------|----------------|---|---|--|
|      | TT0        | 1m  | 1    | 187                           | 132            | 187            | 187            | 132            | 101                               | 101            | 101            | 132            | -              | 132            | 132            | -              | -              | -              | -              | -              |                      |                |   |   |  |
|      | DJC        |     | 1    | 187                           | -              | -              | -              | 132            | -                                 | -              | -              | 132            | 132            | -              | -              | 187            | 187            | 99             | 99             | -              | -                    |                |   |   |  |
| gene | TT0        | 1   | 1    | <i>plu0544</i>                | <i>plu1126</i> | <i>plu1136</i> | <i>notAnno</i> | <i>notAnno</i> | <i>plu3580</i>                    | -              | <i>plu3589</i> | <i>plu3689</i> | <i>plu3697</i> | <i>plu3705</i> | <i>plu3714</i> | -              | -              | -              | -              | -              | DNA_ primas e        | <i>plu0544</i> |   |   |  |
|      |            |     | 2    | <i>plu0544</i>                | <i>plu0544</i> | <i>plu0544</i> | <i>plu0544</i> | <i>plu0544</i> | <i>plu0544</i>                    | -              | <i>plu0544</i> | <i>plu0544</i> | <i>plu0544</i> | <i>plu0544</i> | <i>plu0544</i> | <i>plu0544</i> | -              | -              | -              | -              |                      |                | - |   |  |
|      |            |     | 3    | 3315                          | 3315           | 3315           | 3314           | 2986+341       | 3315                              | -              | 3315           | 3315           | 3315           | 3315           | 3315           | 3318           | -              | -              | -              | -              |                      |                | - |   |  |
|      |            |     | 4    | -                             | -              | -              | -              | Plu9           | -                                 | -              | -              | -              | -              | -              | -              | -              | -              | -              | -              | -              |                      |                | - |   |  |
|      | TT0        | 1m  | core | 1                             | PluTT01m_02775 | PluTT01m_05735 | PluTT01m_05800 | PluTT01m_05840 | PluTT01m_06980+<br>PluTT01m_06990 | PluTT01m_18370 | PluTT01m_18410 | PluTT01m_18450 | PluTT01m_18940 | -              | PluTT01m_18980 | PluTT01m_19030 | -              | -              | -              | -              |                      |                | - |   |  |
|      |            |     |      | 2                             | <i>plu0544</i> | <i>plu0544</i> | <i>plu0544</i> | <i>plu0544</i> | <i>plu0544</i>                    | <i>plu0544</i> | <i>plu0544</i> | <i>plu0544</i> | <i>plu0544</i> | <i>plu0544</i> | -              | <i>plu0544</i> | <i>plu0544</i> | -              | -              | -              |                      |                | - | - |  |
|      |            |     |      | 3                             | 3315           | 3315           | 3315           | 3315           | 2986+341                          | 3315           | 3315           | 3316           | 3315           | -              | 3315           | 3318           | -              | -              | -              | -              |                      |                | - |   |  |
|      |            |     |      | 4                             | -              | -              | -              | -              | Plu9                              | -              | -              | -              | -              | -              | -              | -              | -              | -              | -              | -              |                      |                | - |   |  |
|      | DJC        |     |      | 1                             | PluDJC_02685   | -              | -              | -              | PluDJC_06560                      | -              | -              | -              | PluDJC_18115   | PluDJC_18175   | -              | -              | PluDJC_18220   | PluDJC_18265   | PluDJC_18305   | PluDJC_18340   |                      |                |   |   |  |
|      |            |     |      | 2                             | <i>plu0544</i> | -              | -              | -              | <i>plu0544</i>                    | -              | -              | -              | <i>plu0544</i> | <i>plu0544</i> | -              | -              | <i>plu0544</i> | <i>plu0544</i> | <i>plu0544</i> | <i>plu0544</i> |                      |                |   |   |  |
|      |            |     |      | 3                             | 3315           | -              | -              | -              | 3318                              | -              | -              | -              | 3315           | 3315           | -              | -              | 3315           | 3315           | 3315           | 3315           |                      |                |   |   |  |
|      | intergenic | TT0 | 1    | 1                             | -14            | -14            | -14            | -14            | -14                               | -14            | -              | -14            | -14            | -14            | -14            | -              | -              | -              | -              | -              |                      |                | - |   |  |
| TT0  |            | 1m  | 1    | -14                           | -14            | -14            | -14            | -14            | -14                               | -14            | -14            | -              | -14            | -14            | -              | -              | -              | -              | -              | -              |                      |                |   |   |  |
| DJC  |            | 1   | 1    | -14                           | -              | -              | -              | -14            | -                                 | -              | -              | -14            | -14            | -              | -              | -14            | -14            | -14            | -14            | -              |                      |                |   |   |  |
| gene | TT0        | 1   | 1    | <i>plu0543</i>                | <i>plu1125</i> | <i>plu1135</i> | <i>plu1143</i> | <i>plu1359</i> | <i>plu3579</i>                    | -              | <i>plu3588</i> | <i>plu3688</i> | <i>plu3696</i> | <i>plu3704</i> | <i>plu3713</i> | -              | -              | -              | -              | -              | integra se           | <i>plu0543</i> |   |   |  |
|      |            |     | 2    | <i>plu0543</i>                | <i>plu0543</i> | <i>plu0543</i> | <i>plu0543</i> | <i>plu0543</i> | <i>plu0543</i>                    | -              | <i>plu0543</i> | <i>plu0543</i> | <i>plu0543</i> | <i>plu0543</i> | <i>plu0543</i> | <i>plu0543</i> | -              | -              | -              | -              |                      |                | - |   |  |
|      |            |     | 3    | 1131                          | 1113           | 1131           | 1131           | 1131           | 1131                              | -              | 1131           | 1113           | 1131           | 1131           | 1131           | 1131           | -              | -              | -              | -              |                      |                | - |   |  |
|      | TT0        | 1m  | core | 1                             | PluTT01m_02770 | PluTT01m_05730 | PluTT01m_05795 | PluTT01m_05835 | PluTT01m_06975                    | PluTT01m_18365 | PluTT01m_18405 | PluTT01m_18445 | PluTT01m_18935 | -              | PluTT01m_18975 | PluTT01m_19025 | -              | -              | -              | -              |                      |                | - |   |  |
|      |            |     |      | 2                             | <i>plu0543</i> | <i>plu0543</i> | <i>plu0543</i> | <i>plu0543</i> | <i>plu0543</i>                    | <i>plu0543</i> | <i>plu0543</i> | <i>plu0543</i> | <i>plu0543</i> | <i>plu0543</i> | -              | <i>plu0543</i> | <i>plu0543</i> | -              | -              | -              |                      |                | - | - |  |
|      |            |     |      | 3                             | 1131           | 1113           | 1131           | 1131           | 1131                              | 1131           | 1131           | 1131           | 1113           | -              | 1131           | 1131           | -              | -              | -              | -              |                      |                | - |   |  |
|      | DJC        |     |      | 1                             | PluDJC_02680   | -              | -              | -              | PluDJC_06555                      | -              | -              | -              | PluDJC_18110   | PluDJC_18170   | -              | -              | PluDJC_18215   | PluDJC_18260   | PluDJC_18300   | PluDJC_18335   |                      |                |   |   |  |
|      |            |     |      | 2                             | <i>plu0543</i> | -              | -              | -              | <i>plu0543</i>                    | -              | -              | -              | <i>plu0543</i> | <i>plu0543</i> | -              | -              | <i>plu0543</i> | <i>plu0543</i> | <i>plu0543</i> | <i>plu0543</i> |                      |                |   |   |  |
|      |            |     |      | 3                             | 1131           | -              | -              | -              | 1131                              | -              | -              | -              | 1113           | 1113           | -              | -              | 1131           | 1131           | 1113           | 1113           |                      |                |   |   |  |
|      | intergenic | TT0 | 1    | 2                             | 230            | 248            | 230            | 230            | 230                               | 231            | 231            | 231            | 248            | 248            | 230            | 230            | -              | -              | -              | -              |                      |                | - |   |  |
|      |            | TT0 | 1m   | 2                             | 230            | 248            | 230            | 230            | 230                               | 231            | 231            | 231            | 248            | -              | 230            | 230            | -              | -              | -              | -              |                      |                | - |   |  |
|      |            | DJC | 1    | 2                             | 230            | -              | -              | -              | 230                               | -              | -              | -              | 248            | 248            | -              | -              | 230            | 230            | 248            | 248            |                      |                | - |   |  |
| gene | TT0        | 1   | 1    | <i>notAnno</i>                | <i>notAnno</i> | <i>notAnno</i> | <i>plu1142</i> | <i>notAnno</i> | <i>notAnno</i>                    | -              | <i>notAnno</i> | <i>notAnno</i> | <i>notAnno</i> | <i>notAnno</i> | <i>notAnno</i> |                |                |                |                |                | <i>plu1142</i> -like | <i>plu1142</i> |   |   |  |
|      |            |     | 2    | <i>plu1142</i>                | <i>plu1142</i> | <i>plu1142</i> | <i>plu1142</i> | <i>plu1142</i> | <i>plu1142</i>                    | -              | <i>plu1142</i> | <i>plu1142</i> | <i>plu1142</i> | <i>plu1142</i> | <i>plu1142</i> | <i>plu1142</i> |                |                |                |                |                      |                |   |   |  |
|      |            |     | 3    |                               |                |                |                |                |                                   |                |                |                |                |                |                |                |                |                |                |                |                      |                |   |   |  |
|      | TT0        | 1m  |      | 1                             | PluTT01m_02765 | PluTT01m_05727 | PluTT01m_05790 | PluTT01m_05830 | PluTT01m_06970                    | PluTT01m_18362 | PluTT01m_18402 | PluTT01m_18442 | PluTT01m_18930 | -              | PluTT01m_18970 | PluTT01m_19017 |                |                |                |                |                      |                |   |   |  |
|      |            |     |      | 2                             | <i>plu1142</i> | <i>plu1142</i> | <i>plu1142</i> | <i>plu1142</i> | <i>plu1142</i>                    | <i>plu1142</i> | <i>plu1142</i> | <i>plu1142</i> | <i>plu1142</i> | <i>plu1142</i> | <i>plu1142</i> |                | <i>plu1142</i> | <i>plu1142</i> |                |                |                      |                |   |   |  |
|      |            |     |      | 3                             | 273            | 273            | 273            | 273            | 276                               | 273            | 273            | 273            | 273            | 276            | 276            | 276            | 273            |                |                |                |                      |                |   |   |  |
| DJC  |            |     | 1    | PluDJC_02672+<br>PluDJC_02677 | -              | -              | -              | PluDJC_06550   | -                                 | -              | -              | PluDJC_18105   | PluDJC_18167   | -              | -              | PluDJC_18212   | PluDJC_18257   | PluDJC_18297   | PluDJC_18332   |                |                      |                |   |   |  |

|            |        |   |                |                |                |                |                |                |                |                |                |                |                |                |                |                |                |                |   |                      |                |
|------------|--------|---|----------------|----------------|----------------|----------------|----------------|----------------|----------------|----------------|----------------|----------------|----------------|----------------|----------------|----------------|----------------|----------------|---|----------------------|----------------|
|            |        | 2 | <i>plu1142</i> |                |                |                | <i>plu1142</i> |                |                |                | <i>plu1142</i> | <i>plu1142</i> |                |                | <i>plu1142</i> | <i>plu1142</i> | <i>plu1142</i> | <i>plu1142</i> |   |                      |                |
|            |        | 3 | 72+210         |                |                |                | 276            |                |                |                | 276            | 273            |                |                | 273            | 279            | 273            | 273            |   |                      |                |
|            |        | 4 | Plu9           |                |                |                |                |                |                |                |                |                |                |                |                |                |                |                |   |                      |                |
| intergenic | TTO 1  | 1 | 56             | 51             | 56             | 56             | 56             | 18+42          | 18+42          | 18+42          | 56             | 56             | 56             | 19+47          | -              | -              | -              | -              | - |                      |                |
|            |        | 2 | -              | -              | -              | -              | -              | Plu9           | -              | Plu9           | -              | -              | Plu9           | Plu9           | -              | -              | -              | -              | - |                      |                |
|            | TTO 1m | 1 | 56             | 51             | 56             | 56             | 56             | 18+42          | 18+42          | 18+42          | 56             | -              | 56             | 19+47          | -              | -              | -              | -              | - |                      |                |
|            |        | 2 | -              | -              | -              | -              | -              | Plu9           | Plu9           | Plu9           | -              | -              | -              | Plu9           | -              | -              | -              | -              | - |                      |                |
|            | DJC    | 1 | 51             | -              | -              | -              | 56             | -              | -              | -              | 56             | 51             | -              | -              | 51             | 48             | 51             | 51             | - |                      |                |
|            |        | 2 | -              | -              | -              | -              | -              | -              | -              | -              | -              | -              | -              | -              | -              | -              | -              | -              | - |                      |                |
| gene       | TTO 1  | 1 | <i>plu0542</i> | <i>plu1124</i> | <i>plu1134</i> | <i>plu1141</i> | <i>plu1357</i> | notAnno        | -              | <i>plu3586</i> | notAnno        | notAnno        | notAnno        | <i>plu3711</i> | -              | -              | -              | -              |   |                      |                |
|            |        | 2 | <i>plu0542</i> | <i>plu0542</i> | <i>plu0542</i> | <i>plu0542</i> | <i>plu0542</i> | <i>plu0542</i> | -              | <i>plu0542</i> | <i>plu0542</i> | <i>plu0542</i> | <i>plu0542</i> | <i>plu0542</i> | -              | -              | -              | -              |   |                      |                |
|            |        | 3 | 267            | 267            | 267            | 267            | 267            | 267            | -              | 267            | 267            | 267            | 267            | 267            | -              | -              | -              | -              |   |                      |                |
|            | TTO 1m | 1 | PluTT01m_02757 | PluTT01m_05725 | PluTT01m_05782 | PluTT01m_05822 | PluTT01m_06965 | PluTT01m_18355 | PluTT01m_18395 | PluTT01m_18435 | PluTT01m_18925 | -              | PluTT01m_18965 | PluTT01m_19010 | -              | -              | -              | -              |   |                      |                |
|            |        | 2 | <i>plu0542</i> | <i>plu0542</i> | <i>plu0542</i> | <i>plu0542</i> | <i>plu0542</i> | <i>plu0542</i> | <i>plu0542</i> | <i>plu0542</i> | <i>plu0542</i> | -              | <i>plu0542</i> | <i>plu0542</i> | -              | -              | -              | -              |   |                      |                |
|            |        | 3 | 261            | 261            | 261            | 261            | 261            | 261            | 261            | 261            | 261            | -              | 261            | 261            | -              | -              | -              | -              |   |                      |                |
|            | DJC    | 1 | PluDJC_02670   | -              | -              | -              | PluDJC_06545   | -              | -              | -              | PluDJC_18100   | PluDJC_18165   | -              | -              | PluDJC_18210   | PluDJC_18250   | PluDJC_18295   | PluDJC_18330   |   |                      |                |
|            |        | 2 | <i>plu0542</i> | -              | -              | -              | <i>plu0542</i> | -              | -              | -              | <i>plu0542</i> | <i>plu0542</i> | -              | -              | <i>plu0542</i> | <i>plu0542</i> | <i>plu0542</i> | <i>plu0542</i> |   |                      |                |
|            |        | 3 | 261            | -              | -              | -              | 261            | -              | -              | -              | 261            | 261            | -              | -              | 261            | 261            | 261            | 261            |   |                      |                |
|            |        |   |                |                |                |                |                |                |                |                |                |                |                |                |                |                |                |                |   | <i>plu0542</i> -like | <i>plu0542</i> |
| intergenic | TTO 1  | 1 | 54             | 54             | 54             | 54             | 54             | 54             | -              | 54             | 54             | 54             | 54             | 54             | -              | -              | -              | -              | - |                      |                |
|            | TTO 1m | 1 | 54             | 54             | 54             | 54             | 54             | 54             | 54             | 54             | -              | 54             | 54             | -              | -              | -              | -              | -              | - |                      |                |
|            | DJC    | 1 | 54             | -              | -              | -              | 54             | -              | -              | -              | 54             | 54             | -              | -              | 54             | 54             | 54             | 54             | - |                      |                |

**Supplementary Table S9: Oligonucleotides used for *P. luminescens* strain diagnostics to differentiate between strain TT01 and DJC.**

| <b>Primer name</b> | <b>Sequence 5' → 3'</b>         |
|--------------------|---------------------------------|
| candidate1_fwd     | TTCTGTAGTATTACTTCGCAGTTAAAG     |
| candidate1_rev     | TTGTTATTAATGCTGACGTTTCCTATTTATG |
| candidate2_fwd     | ATATCTTGGGATGGGTCTCTTTAGGTTTTG  |
| candidate2_rev     | GGTAAATGCAAAATATTCACCTACTG      |
| candidate3_fwd     | TTCTTAGAAACTGTTAACGTTTCCTATTG   |
| candidate3_rev     | ATGGCTACTAATACAGAACGTAAAGAGAC   |
| candidate4_fwd     | CAGGAGCTACGCGACAAGACCTTGC       |
| candidate4_rev     | GCGATCGTAAACTTCTATTTG           |
| candidate5_fwd     | TGTCGATGACCGAATTCAGTGAATG       |
| candidate5_rev     | CGTGCCACCTGACTCAATTGTTG         |

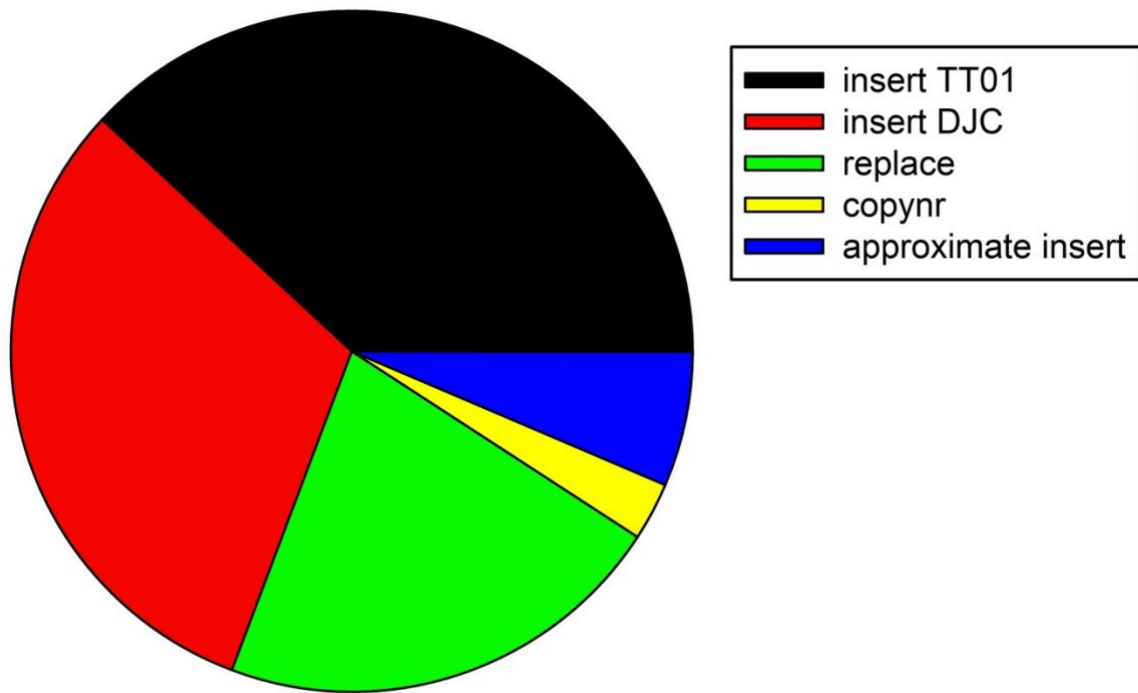

**Figure S1: Relative contribution of divergence region classes between *P. luminescens* TT01 and DJC.** For indels and approximate inserts, strain-specific data are shown. The few approximate inserts (13 total, 8 in DJC, 5 in TT01m) are not graphically separated. All other classes are symmetric between the two strains.

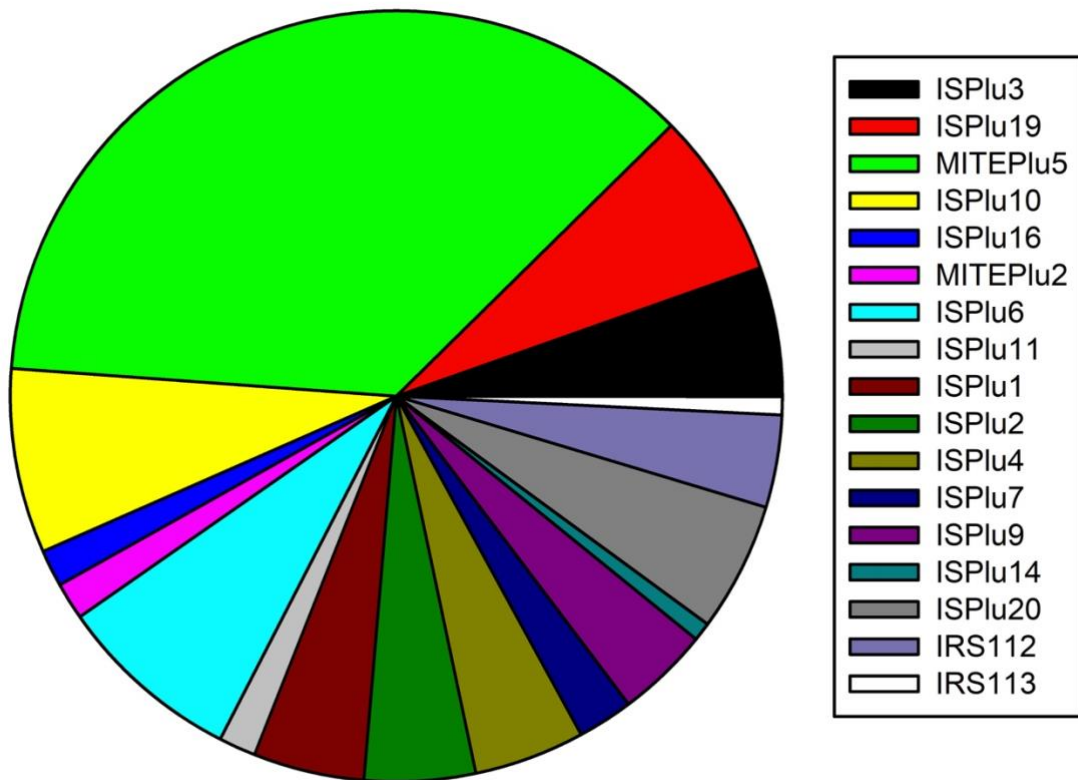

**Figure S2: Relative frequency of transposons and other mobile genetic elements in indels and approximate inserts.** ISPlu3, ISPlu19 and MITEPlu5 correspond to the CCC subtype of IS630-type elements (63 total of which 47 are MITEPlu5), ISPlu10+ISPlu16+MITEPlu2 correspond to the AATAA subtype of IS630-type elements (14 total), and ISPlu6 and ISPlu11 are both IS982-type elements (12 total). All other elements are unrelated to each other.
